# Supplementary material for: Reporting and transparent research practices in sports medicine and orthopaedic clinical trials: a meta-research study
Source: PubMed Central journal article supplement — BMJ Open. 2022 Aug 8;12(8):e059347. doi: 10.1136/bmjopen-2021-059347 (PMC9364413; doi:10.1136/bmjopen-2021-059347), 2022-08-08
Supplement: bmjopen-2021-059347.draft_revisions.pdf [file bmjopen-2021-059347.draft_revisions.pdf]

# BMJ Open

BMJ Open is committed to open peer review. As part of this commitment we make the peer review history of every article we publish publicly available.

When an article is published we post the peer reviewers' comments and the authors' responses online. We also post the versions of the paper that were used during peer review. These are the versions that the peer review comments apply to.

The versions of the paper that follow are the versions that were submitted during the peer review process. They are not the versions of record or the final published versions. They should not be cited or distributed as the published version of this manuscript.

BMJ Open is an open access journal and the full, final, typeset and author-corrected version of record of the manuscript is available on our site with no access controls, subscription charges or pay-per-view fees (<http://bmjopen.bmj.com>).

If you have any questions on BMJ Open's open peer review process please email [info.bmjopen@bmj.com](mailto:info.bmjopen@bmj.com)

# BMJ Open

## The devil is in the details: Reporting and transparent research practices in sports medicine and orthopedic clinical trials

|                               |                                                                                                                                                                                                                                                                                                                                                                                                                                                                                        |
|-------------------------------|----------------------------------------------------------------------------------------------------------------------------------------------------------------------------------------------------------------------------------------------------------------------------------------------------------------------------------------------------------------------------------------------------------------------------------------------------------------------------------------|
| Journal:                      | <i>BMJ Open</i>                                                                                                                                                                                                                                                                                                                                                                                                                                                                        |
| Manuscript ID                 | bmjopen-2021-059347                                                                                                                                                                                                                                                                                                                                                                                                                                                                    |
| Article Type:                 | Original research                                                                                                                                                                                                                                                                                                                                                                                                                                                                      |
| Date Submitted by the Author: | 25-Nov-2021                                                                                                                                                                                                                                                                                                                                                                                                                                                                            |
| Complete List of Authors:     | Schulz, Robert; Berlin Institute of Health (BIH) at Charité, BIH QUEST Center for Responsible Research; University of Potsdam, Department of Sport and Health Sciences Potsdam<br>Langen, Georg; Institute for Applied Training Science<br>Prill, Robert; Brandenburg Medical School Theodor Fontane, Center of Orthopaedics and Traumatology<br>Cassel , Michael; University of Potsdam<br>Weissgerber, Tracey; Berlin Institute of Health, BIH QUEST Center for Responsible Research |
| Keywords:                     | Clinical trials < THERAPEUTICS, STATISTICS & RESEARCH METHODS, SPORTS MEDICINE, REHABILITATION MEDICINE, ORTHOPAEDIC & TRAUMA SURGERY, MEDICAL EDUCATION & TRAINING                                                                                                                                                                                                                                                                                                                    |
|                               |                                                                                                                                                                                                                                                                                                                                                                                                                                                                                        |

SCHOLARONE™  
Manuscripts

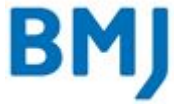

I, the Submitting Author has the right to grant and does grant on behalf of all authors of the Work (as defined in the below author licence), an exclusive licence and/or a non-exclusive licence for contributions from authors who are: i) UK Crown employees; ii) where BMJ has agreed a CC-BY licence shall apply, and/or iii) in accordance with the terms applicable for US Federal Government officers or employees acting as part of their official duties; on a worldwide, perpetual, irrevocable, royalty-free basis to BMJ Publishing Group Ltd ("BMJ") its licensees and where the relevant Journal is co-owned by BMJ to the co-owners of the Journal, to publish the Work in this journal and any other BMJ products and to exploit all rights, as set out in our [licence](#).

The Submitting Author accepts and understands that any supply made under these terms is made by BMJ to the Submitting Author unless you are acting as an employee on behalf of your employer or a postgraduate student of an affiliated institution which is paying any applicable article publishing charge ("APC") for Open Access articles. Where the Submitting Author wishes to make the Work available on an Open Access basis (and intends to pay the relevant APC), the terms of reuse of such Open Access shall be governed by a Creative Commons licence – details of these licences and which [Creative Commons](#) licence will apply to this Work are set out in our licence referred to above.

Other than as permitted in any relevant BMJ Author's Self Archiving Policies, I confirm this Work has not been accepted for publication elsewhere, is not being considered for publication elsewhere and does not duplicate material already published. I confirm all authors consent to publication of this Work and authorise the granting of this licence.

# The devil is in the details: Reporting and transparent research practices in sports medicine and orthopedic clinical trials

Robert Schulz<sup>1,2</sup>, Georg Langen<sup>3</sup>, Robert Prill<sup>4</sup>, Michael Cassel<sup>2</sup>, Tracey Weissgerber<sup>1</sup>

<sup>1</sup> Berlin Institute of Health (BIH) at Charité, QUEST Center for Responsible Research, Berlin, Germany

<sup>2</sup> University of Potsdam, Department of Sport and Health Sciences, Potsdam, Germany

<sup>3</sup> Institute for Applied Training Science, Leipzig, Germany

<sup>4</sup> Brandenburg Medical School Theodor Fontane, Department of Orthopedics and Traumatology, Brandenburg, Germany

## Corresponding author:

Tracey Weissgerber, PhD

Berlin Institute of Health at Charité (BIH)

BIH QUEST Center for Responsible Research

Anna-Louisa-Karsch-Str. 2

10178 Berlin

[tracey.weissgerber@charite.de](mailto:tracey.weissgerber@charite.de)

**Word count:** 4032

## Abstract

**Objectives:** Transparent reporting of clinical trials is essential to assess the risk of bias and translate research findings into clinical practice. While existing studies have shown that deficiencies are common, detailed empirical and field-specific data is scarce. Therefore, this study aimed to examine current clinical trial reporting and transparent research practices in sports medicine and orthopedics.

**Setting:** Exploratory meta-research study on reporting quality and transparent research practices in orthopedics and sports medicine clinical trials.

**Participants:** The sample included clinical trials published in the top 25% of sports medicine and orthopedics journals over nine months.

**Primary and secondary outcome measures:** Two independent reviewers assessed pre-registration, open data, and criteria related to scientific rigor, the study sample, and data analysis.

**Results:** The sample included 163 clinical trials from 27 journals. While the majority of trials mentioned rigor criteria, essential details were often missing. Sixty percent (confidence interval [CI] 53-68%) of trials reported sample size calculations, but only 32% (CI 25-39%) justified the expected effect size. Few trials indicated the blinding status of all main stakeholders (4%; CI 1-7%). Only 18% (CI 12-24%) included information on randomization type, method, and concealed allocation. Most trials reported participants' sex/gender (95%; CI 92-98%) and information on inclusion and exclusion criteria (78%; CI 72-84%). Only 20% (CI 14-26%) of trials were pre-registered. No trials deposited data in open repositories.

**Conclusions:** These results will aid the sports medicine and orthopedics community in developing tailored interventions to improve reporting. While authors typically mention blinding, randomization and other factors, essential details are often missing. Greater acceptance of open science

1  
2  
3 practices, like pre-registration and open data, is needed. These practices have been widely  
4 encouraged, we discuss systemic interventions that may improve clinical trial reporting.  
5  
6  
7

8 **Trial registration:** <https://doi.org/10.17605/OSF.IO/9648H>  
9  
10  
11  
12  
13  
14  
15  
16  
17  
18  
19  
20  
21  
22  
23  
24  
25  
26  
27  
28  
29  
30  
31  
32  
33  
34  
35  
36  
37  
38  
39  
40  
41  
42  
43  
44  
45  
46  
47  
48  
49  
50  
51  
52  
53  
54  
55  
56  
57  
58  
59  
60

## Strengths and limitations of this study

- The present study provides an in-depth assessment of clinical trial reporting quality, and utilization of transparent research practices in a recent sample of published clinical trials on orthopaedics and sports medicine.
- A comprehensive set of outcome parameters was assessed, covering fundamental aspects like scientific rigor, the study sample, and data analysis but also the utilization of pre-registration and open science practices.
- All assessments were performed by two independent reviewers and disagreements were resolved by consensus.
- The cross-sectional design and exploratory nature of the present study cannot provide information about cause-effect relationships. The odds ratios calculated in the present study were exploratory post-hoc calculations.
- The sample consisted of the top 25% of sports medicine and orthopedics journals, hence our findings may not be generalizable to journals that are not indexed by PubMed, lower tier journals, or non-English journals.

## Introduction

The overarching goal of medical research is to improve healthcare for patients, which requires the biomedical community to translate study outcomes into clinical practice (1). Clinical trials are central to this process, as properly conducted trials reduce the risk of bias and increase the likelihood that results about new treatments will be trustworthy, reproducible and generalizable (2,3). Clinical trials must be properly designed, conducted, and reported (4) to facilitate translation. Poorly designed and conducted trials may not be trustworthy or reproducible. This undermines public trust in biomedical research and raises concerns about whether the trial costs and patient risks were justified (5,6). Poor reporting makes it difficult to distinguish between trials with and without a high risk of bias.

To improve clinical trial reporting, the Consolidated Standards of Reporting Trials (CONSORT) guidelines (7,8) have been recommended by the ICMJE and widely disseminated by the EQUATOR network (9,10). While reporting has improved over time, major deficiencies that can impair translation are still common (11,12). Details needed to assess the risk of bias were missing from many published trials. More than half of all trials failed to address allocation concealment, and almost one third of studies did not address blinding of participants and personnel (12). Similarly, among randomized controlled trials published in the top five orthopedics journals, 60% failed to address the blinding status of the participants and 58% did not specify the number of participants included in the final analysis (13).

Orthopedics and sports medicine researchers have joined efforts to improve study design and reporting. Newly formed societies (14,15) and editorial series (16) focus on improving research quality in sports medicine and orthopedics. These efforts are urgently needed, as only 1% of studies in high-impact orthopedic journals reported all ten criteria needed for risk of bias assessment (13). In 42% of papers, risk of bias could not be assessed due to incomplete reporting (13). Incomplete reporting of exercise interventions (17) makes it impossible to implement interventions in clinical practice or to assess the appropriateness of the control intervention (18).



1  
2  
3 In sports medicine related fields, meta-researchers suggested that scientists may be using  
4 questionable research practices (Table 1) after observing overinflated effect sizes (19) and an  
5 unreasonably high number of papers that support the study hypothesis (20). Comprehensive  
6 reporting may prevent these biases or make them easier to detect. However, earlier studies have  
7 shown that reporting deficiencies are still common in orthopedics (13) and general medical  
8 journals (12,21).  
9  
10  
11  
12  
13  
14

15 Therefore, this meta-research study examined reporting among clinical trials published in the top  
16 25% of sports medicine and orthopedics journals. Our objective was to assess the prevalence of  
17 reporting for selected criteria, including pre-registration, open data and reporting of randomization,  
18 blinding, sample size calculations, data analysis and the flow of participants through the study.  
19  
20  
21  
22  
23  
24  
25  
26  
27  
28  
29  
30  
31  
32  
33  
34  
35  
36  
37  
38  
39  
40  
41  
42  
43  
44  
45  
46  
47  
48  
49  
50  
51  
52  
53  
54  
55  
56  
57  
58  
59  
60

Meta-research data on clinical trial design, conduct and reporting will help researchers in sports  
medicine to implement targeted measures to improve trial design and reporting.

**Table 1** Terminology and concepts. Created by the authors.

|                                                   |                                                                                                                                                                                                                                                                                                                                                                                                                                                                 |
|---------------------------------------------------|-----------------------------------------------------------------------------------------------------------------------------------------------------------------------------------------------------------------------------------------------------------------------------------------------------------------------------------------------------------------------------------------------------------------------------------------------------------------|
| <b>Concept</b>                                    |                                                                                                                                                                                                                                                                                                                                                                                                                                                                 |
| <b>Questionable research practices</b>            | Questionable research practices are defined as “Design, analytic, or reporting practices that have been questioned because of the potential for the practice to be employed with the purpose of presenting biased evidence in favor of an assertion” (22)                                                                                                                                                                                                       |
| <b>Selective reporting/ cherry picking</b>        | The decision about whether to publish a study or parts of a study is based on the direction or statistical significance of the results (23,24). Pre-registration and Registered Reports may prevent selective reporting (25,26), which is also known as cherry picking.                                                                                                                                                                                         |
| <b>Publication bias</b>                           | The decision about whether to publish research findings depends on the strength and direction of the findings (27). The odds of publication are nearly four times higher among clinical trials with positive findings, compared to trials with negative or null findings (28).                                                                                                                                                                                  |
| <b>Outcome reporting bias</b>                     | Only particular outcome variables are included in publications and decisions about which variables to include are based on the statistical significance or direction of the results (23). Outcomes that are statistically significant have higher odds of being fully reported than non-significant outcomes (29,30).                                                                                                                                           |
| <b>Attrition bias</b>                             | Attrition refers to reductions in the number of participants throughout the study due to withdrawals, dropouts, or protocol deviations. Attrition bias occurs when there are systematic differences between people who leave the study and those who continue (31).<br><br>For example, a trial shows no differences between two treatments. In one group, however, half the participants dropped out because they underwent surgery due to worsening symptoms. |
| <b>Null hypothesis statistical testing (NHST)</b> | NHST is originally based on theories of Fischer and Neyman-Pearson. The null hypothesis is rejected or accepted depending on the position of an observed value in a test distribution. While NHST is standard practice in many fields, the International Committee of Medical Journal Editors warns against the sole reliance on NHST due to several shortcomings of this approach (32).                                                                        |
| <b>p-Hacking</b>                                  | Describes the process of analyzing the data in multiple ways until statistically significant results are found.                                                                                                                                                                                                                                                                                                                                                 |
| <b>HARKing</b>                                    | HARKing, or hypothesizing after results are known, is defined as presenting a post hoc hypothesis as if it were an a priori hypothesis (33).                                                                                                                                                                                                                                                                                                                    |

## Methods

### Protocol Pre-registration

The study was pre-registered on the Open Science Framework (RRID:SCR\_003238) at <https://doi.org/10.17605/OSF.IO/9648H>. Additional details regarding sample selection and screening, data abstraction, and sample size calculation can be found in the supplemental materials.

### Sample selection and screening

We systematically examined clinical trials published in the top 25% of orthopedics and sports medicine journals over nine months. This sampling strategy provides a broad overview of practices in the field while including high-impact journals, which have the potential to drive change. Journals in the orthopedics and sports medicine category were selected based on the Scimago Journal Rank indicator (34) (supplementary methods). The top 25% of journals (n=65) were entered into the PubMed search with article type (clinical trial) and publication date (2019/12:2020/08) filters. The search was run on September 16, 2020. All articles (n=175 from 27 journals) were uploaded into Rayyan (RRID:SCR\_017584; 35) for screening. Two reviewers (RS, GL) screened titles and abstracts to exclude articles that were obviously not clinical trials, as defined by the ICMJE. The ICMJE defines a clinical trial as any research project that “prospectively assigns people or a group of people to an intervention, with or without concurrent comparison or control groups, to study the relationship between a health-related intervention and a health outcome”(9). Two independent reviewers (RS, GL, RP) then performed full-text screening. All papers meeting the ICMJE clinical trial definition were included, whereas articles that did not meet the definition were excluded. Studies looking at both health-related and non-health-related outcomes were included but data abstraction focused on health-related outcomes only. Disagreements were resolved by consensus.

## Data abstraction

Two independent assessors (RS, GL, RP) reviewed each article and its supplemental files to evaluate the reporting of pre-specified criteria and extracted data using preformatted Excel spreadsheets. Table 2 presents the main criteria that were abstracted and a reason for their selection. The transparency and rigor criteria are based on CONSORT criteria for methods and results reporting (7,8). We also abstracted additional open science criteria, focusing on open access and open data (36,37). The abstraction protocol was deposited on the Open Science Framework (RRID:SCR\_003238) at <https://osf.io/q8b46/>.

## Protocol Deviations

For trials with exercise interventions, we assessed the frequency, intensity, and volume of exercise for experimental and control interventions. The protocol was modified if the control intervention did not involve exercise. Control interventions were rated as fully reported if the frequency, the content, and the duration was described. Control groups that received no intervention (e.g. wait-and-see) were rated as fully reported if the activity status or number of other treatments were monitored.

Trial registration statement assessments were amended to determine whether trials were registered prospectively or retrospectively. Two abstractors (RS, MP) assessed each trial registration. Trials were considered pre-registered if their registration was completed before the first participant was enrolled. Otherwise, the trial was classified as retrospectively registered. If the primary outcome was changed after the study began, the trial was classified as retrospectively registered.

## Statistical Analysis

This exploratory study assessed the prevalence of reporting for selected criteria in sports medicine and orthopedics clinical trials. Results are presented as the percentage of trials reporting each outcome measure, with a 95% confidence interval.

1  
2  
3 Odds ratios and their 95% confidence intervals were calculated to examine the relationship  
4  
5 between the completeness of reporting and pre-registration, the use of flow charts, or the presence  
6  
7 of sample size calculations and the completeness of reporting. Odds ratios were interpreted as  
8  
9 unclear if the confidence interval included 1. These analyses were not pre-registered.  
10

### 11 **Sample Size Calculation**

12  
13  
14 This exploratory study does not require formal sample size calculations. However, we adhered to  
15  
16 conventional sample size recommendations for exploratory designs and performed a precision-  
17  
18 based sample size calculation to obtain rough estimates of relevant sample sizes (supplemental  
19  
20 methods). Depending on different assumptions, a required sample size of 124 to 203 trials was  
21  
22 estimated.  
23  
24  
25  
26  
27  
28  
29  
30  
31  
32  
33  
34  
35  
36  
37  
38  
39  
40  
41  
42  
43  
44  
45  
46  
47  
48  
49  
50  
51  
52  
53  
54  
55  
56  
57  
58  
59  
60

**Table 2** Criteria for reporting and transparent research practices. The table shows specific questions used to assess each outcome criteria and provides a brief justification for why each criteria was selected. Created by the authors.

| Category                                        | Assessment                                                                                                                                                                                                                                                                                                                                                                                              | Rationale and Context                                                                                                                                                                                                                                                                                                                                                                                                                                                                                                                                                                                                           |
|-------------------------------------------------|---------------------------------------------------------------------------------------------------------------------------------------------------------------------------------------------------------------------------------------------------------------------------------------------------------------------------------------------------------------------------------------------------------|---------------------------------------------------------------------------------------------------------------------------------------------------------------------------------------------------------------------------------------------------------------------------------------------------------------------------------------------------------------------------------------------------------------------------------------------------------------------------------------------------------------------------------------------------------------------------------------------------------------------------------|
| <b>Sample Size calculation</b>                  | <p>Was an a priori sample size calculation performed?</p> <p>What type of sample size calculation was performed?</p> <p>Did the authors provide a justification for the expected effect size?</p>                                                                                                                                                                                                       | <ul style="list-style-type: none"> <li>- Low power is associated with high rates of spurious findings and overinflated effect sizes (38), and there is evidence for low median statistical power in rehabilitation research [40].</li> <li>- A priori sample size calculations help to prevent underpowered trials, however, they are regularly performed inadequately. Common problems include failing to justify the expected treatment effect and not stating all values required for calculation (39). The majority of sample size calculations in rehabilitation trials are missing expected effect sizes (40).</li> </ul> |
| <b>Randomization &amp; concealed allocation</b> | <p>Did the authors address whether randomization was used?</p> <p>If so, were the randomization type and method mentioned?</p> <p>Were the following details of the allocation concealment procedure addressed?</p> <ul style="list-style-type: none"> <li>- Who generated the randomization sequence?</li> <li>- Who enrolled participants?</li> <li>- Who assigned participants to groups?</li> </ul> | <ul style="list-style-type: none"> <li>- Inadequate randomization and allocation concealment procedures introduce selection bias and are associated with increased odds of significant but spurious results (41) and overestimated treatment effects (42).</li> </ul>                                                                                                                                                                                                                                                                                                                                                           |
| <b>Blinding</b>                                 | <p>Did the article include a statement on blinding?</p> <p>Was the blinding status of each of the major stakeholders mentioned (participants, healthcare providers, outcome assessors, data analysts)?</p> <p>Was each stakeholder group blinded?</p>                                                                                                                                                   | <ul style="list-style-type: none"> <li>- Blinding prevents ascertainment bias in clinical trials. A lack of blinding is associated with overinflated effect sizes (43). Terms like double-blind are ambiguous, interpreted differently, and don't provide reliable information on blinding of specific stakeholder groups (44). These terms should be abandoned in favor of reporting the blinding status of all relevant stakeholders (8).</li> </ul>                                                                                                                                                                          |
| <b>Flow of participants</b>                     | <p>Were the inclusion and exclusion criteria clearly stated?</p> <p>Did the authors define how many participants were excluded at each phase of the study and list reasons for exclusion?</p> <p>Did the authors present this information in a flow chart?</p>                                                                                                                                          | <ul style="list-style-type: none"> <li>- Detailed inclusion and exclusion criteria help the reader to assess generalizability.</li> <li>- Knowing when and why participants dropped out or were removed from the study is essential to estimate attrition bias.</li> </ul>                                                                                                                                                                                                                                                                                                                                                      |
| <b>Data analysis</b>                            | <p>Was a study hypothesis presented and a primary outcome specified?</p> <p>Was the hypothesis supported or rejected?</p>                                                                                                                                                                                                                                                                               | <ul style="list-style-type: none"> <li>- Specifying the study hypothesis and the primary outcome prospectively safeguards against selective reporting. Discrepancies between the registration</li> </ul>                                                                                                                                                                                                                                                                                                                                                                                                                        |

|                                      |                                                                                                                                                                                                                                                                                                                                                                                                                   |                                                                                                                                                                                                                                                                                                                                                                                                                                                                                                                                                                                                                                                                                                                                                                                                                                  |
|--------------------------------------|-------------------------------------------------------------------------------------------------------------------------------------------------------------------------------------------------------------------------------------------------------------------------------------------------------------------------------------------------------------------------------------------------------------------|----------------------------------------------------------------------------------------------------------------------------------------------------------------------------------------------------------------------------------------------------------------------------------------------------------------------------------------------------------------------------------------------------------------------------------------------------------------------------------------------------------------------------------------------------------------------------------------------------------------------------------------------------------------------------------------------------------------------------------------------------------------------------------------------------------------------------------|
|                                      | <p>If NHST was performed, were exact p-values, degrees of freedom, and the test statistics presented?</p> <p>Were standardized effect sizes and their precision reported?</p>                                                                                                                                                                                                                                     | <p>and the study report may indicate outcome switching, which favors statistically significant results and introduces selective reporting bias (45,46).</p> <ul style="list-style-type: none"> <li>- Reporting the test statistic and degrees of freedom allows readers to identify misreported p-values. In 13% of psychology studies, meta-researchers detected mismatches between p-values and the reported test statistic and degrees of freedom that would affect statistical conclusions (47).</li> <li>- Analyses should take the magnitude, confidence, and likelihood of an effect into account, instead of focusing on whether effects are statistically significant. Effect sizes show the magnitude of effects within a study, while standardized effect sizes allow for comparisons across studies (48).</li> </ul> |
| <p><b>Data visualization</b></p>     | <p>Were bar graphs used to visualize continuous data?</p>                                                                                                                                                                                                                                                                                                                                                         | <ul style="list-style-type: none"> <li>- Using bar graphs to visualize continuous data is problematic because many different data distributions can lead to the same bar graph. The actual data may suggest different conclusions from the summary statistics alone (49,50).</li> </ul>                                                                                                                                                                                                                                                                                                                                                                                                                                                                                                                                          |
| <p><b>Intervention reporting</b></p> | <p>What type of intervention was performed (e.g. exercise, physical therapy, surgery)?</p> <p>For exercise interventions:</p> <ul style="list-style-type: none"> <li>- Was monitoring of adherence to the intervention addressed?</li> <li>- Were essential details needed to replicate the experimental and control interventions (e.g. frequency, intensity, volume, and type of exercise) provided?</li> </ul> | <ul style="list-style-type: none"> <li>- When clinical trials do not report details needed to implement the intervention, findings cannot be translated into clinical practice. The minority of exercise studies provided enough information to allow others to replicate interventions (51). The high prevalence of insufficient reporting led to the establishment of new intervention reporting guidelines (52,53).</li> <li>- Adherence can effect intervention efficacy. Intervention effects can be up to three times larger in fully adherent participants compared to partly adherent participants (54).</li> </ul>                                                                                                                                                                                                      |
| <p><b>Transparency criteria</b></p>  | <p>Was the study registered or pre-registered?</p> <p>Was a data availability statement included? Were the data publically available?</p> <p>Was the study openly accessible?</p>                                                                                                                                                                                                                                 | <ul style="list-style-type: none"> <li>- Half of researchers admit to selectively reporting results and presenting post hoc analyses as if they had been pre-specified (22). Pre-registration protects against this. Pre-registration (since 2005) and data availability statements (since 2018) are mandatory for clinical trials (55).</li> <li>- Open access papers generate more media coverage and citations (56).</li> <li>- Open data facilitates collaboration and benefits society (56). In 2017, 21% of 316 biomedical journals (57) and 28% of funders (58) required open data.</li> </ul>                                                                                                                                                                                                                            |

## Results

175 articles were screened, and 168 articles were reviewed from 27 sports medicine and orthopedics journals (Figure S1, Table S1). Eleven articles were excluded because they did not meet the ICMJE clinical trial criteria. One extended conference abstract was excluded because it was not a full-length research article. Analyses included the remaining 163 papers.

For peer review only



## Rigor and Sample Criteria

**Figure 1** Reporting prevalence for rigor and sample criteria. This plot displays the percentage of trials that addressed each criteria. For information on the actual randomization or blinding status, please refer to the text. The different colored data points are for better visual differentiation of each subcategory. Created by the authors.

**Sample size calculations:** In trials not reporting a priori sample size calculation (Figure 1), 2% (CI 0-5%; n=4) reported that no sample size calculation was performed because the study was an exploratory pilot study. Among trials reporting sample size calculations (n=98), 53% (CI 43-63%; n=52) included a justification for the expected effect size. The remaining trials either presented no justification (39%; CI 23-42; n=32) or used arbitrary effect size thresholds (14%; CI 7-21%; n=14). Almost all sample size calculations were based on statistical power (93%; CI 88-98%; n=96). Two sample size calculations were based on precision (2%; CI 0-5%). No calculations were based on Bayes methods.

**Randomization and allocation concealment:** In trials not addressing randomization (Figure 1), two trials (1%; CI 0-3%) were not randomized, and five trials did not mention randomization (3%; CI 0-6%).

Eight percent (CI 4-12%; n=13) of trials provided complete information on the allocation concealment procedure (defined as reporting who generated the randomization sequence, and who enrolled participants and assigned them to interventions). Some of this information was available 23% (CI 16-29%; n=37) of trials, and 69% (CI 62-76%; n=113) did not report any information. Few studies reported at least some information on all three factors needed to assess randomization and allocation concealment (randomization type, method, and allocation concealment; 18%; CI 12-24%; n=30).

**Blinding:** Two-thirds of trials addressed blinding (Figure 2). Among trials that addressed blinding (Figure 1), 81% (CI 73-88%; n=84) used blinding, while 19% (CI 12-27%; n=20) were not blinded. Only 4% (CI 1-7%; n=7) of all trials addressed the blinding status of all four stakeholder groups

1  
2  
3 (Figure 2). Trials were most likely to address the blinding status of the outcome assessors and the  
4  
5 participants. The blinding status of data analysts is typically unreported.  
6  
7

8 **Figure 2** The blinding status across the main different stakeholder groups across all clinical trials  
9 (n=163). Created by the authors.  
10  
11  
12  
13  
14  
15  
16  
17  
18  
19  
20  
21  
22  
23  
24  
25  
26  
27  
28  
29  
30  
31  
32  
33  
34  
35  
36  
37  
38  
39  
40  
41  
42  
43  
44  
45  
46  
47  
48  
49  
50  
51  
52  
53  
54  
55  
56  
57  
58  
59  
60

For peer review only

## Sample-related Criteria

Approximately three-quarters of trials reported the inclusion and exclusion criteria and provided complete information on the number of participants at enrollment, after enrollment, and included in data analysis (Figure 1). Fewer trials used a flow chart to illustrate the number of included and excluded participants at each stage. Among trials that did not report the reasons for all exclusions after enrollment (Figure 1), 17% (CI 11-22%; n=24/90) reported the reasons for some exclusions and 33% (CI 26-41%; n=41/90) did not report any information.

In trials that stated participants' sex or gender (Figure 1), a median of 51% (interquartile range (IQR) 27-71%) of participants were women in the group with the highest proportion of women, vs. 49% (IQR 22-66%) in the group with the lowest proportion of women.

## Intervention Criteria

The most frequent intervention type was exercise (44%; CI 37-52%; n=72), followed by surgery (26%; CI 19-32%; n=42). Diet (6%; CI 2-9%; n=9), physical therapy (5%; CI 2-8%; n=8), pharmacological interventions (4%; CI 0-2%; n=7) and manual therapy (1%; CI 0-2%; n=1) were uncommon. Fifteen percent (CI 9-20% n=24) of studies used other interventions.

We next examined reporting of details needed to assess or implement exercise interventions. Sixty-two percent (CI 50-73%; n=42) of trials with exercise interventions monitored adherence or compliance, one trial (1%; CI 0-4%) reported that adherence was not monitored, and 37% (CI 25-48%; n=25) of trials did not mention intervention adherence or compliance. All trials reported at least some information about the experimental exercise intervention, and most trials provided complete information (Table 2) (83%; CI 75-92%; n=60). Fewer trials reported complete information for the control interventions (63%; CI 51-74%; n=45). Five trials did not provide any information about the control intervention (7%; CI 1-13%).

## Data analysis and Transparency Criteria

**Figure 3** Reporting prevalence for data analysis and transparency criteria. This plot displays the percentage of trials that addressed each criteria. Abbreviations: NHST, null hypothesis statistical testing; ES, effect size. Created by the authors.

**Hypotheses and outcome measures:** Nearly half of the articles specified a primary outcome and almost two-thirds of articles presented a hypothesis (Figure 3). Among clinical trials that reported a hypothesis (Figure 3), 61% (CI 53-68%; n=62) supported the main hypothesis, while 39% of trials (CI 32-47; n=40) did not support the main hypothesis.

**Statistical Reporting:** Almost all studies used NHST (Figure 3). While most trials reported exact p-values, few reported test statistics and degrees of freedom. Approximately half of the trials reported standardized effect sizes but only 21% included the precision of the effect size estimates. One study reported Bayesian statistics (1%; CI 0-2%).

**Data visualization:** Bar graphs were used to display continuous data in 21% (CI 15-21%; n=34) of trials. These graphs should be replaced with more informative graphics (e.g. dot plots, box plots or violin plots) that show the data distribution(49,50).

### Transparency

Most of the studies with registration statements (Figure 3) were registered in ClinicalTrials.gov (n=52), followed by the Australian New Zealand Clinical Trials Registry (n=9), International Standard Randomized Controlled Trial Number Register (n=4), and other regional clinical trials registries (n=9). Less than half of the registered trials, and 20% of all trials, were pre-registered. The remaining trials with registration statements were registered retrospectively (58%; CI 48-69%; n=49/84). This included six prospectively registered trials where the primary outcome was changed after data collection started. Two studies with registration statements did not provide sufficient information to determine whether the study was registered prospectively or retrospectively (2%; CI 0-6%; n=2/84).

1  
2  
3 Data availability statements were uncommon (Figure 3). No trial with a data availability statement  
4 deposited data publically in an open repository. Twenty-one percent of trials with data availability  
5 statements (15-27%; n=4) noted that data were not publicly available, whereas 74% (67-80%;  
6 n=15) stated that data were available upon request. One study (5%; CI 2-9%) reported that all  
7 data were available in the main text and its supplements, however, raw data was not available in  
8 either location.  
9  
10  
11  
12  
13  
14  
15  
16  
17  
18  
19  
20  
21  
22  
23  
24  
25  
26  
27  
28  
29  
30  
31  
32  
33  
34  
35  
36  
37  
38  
39  
40  
41  
42  
43  
44  
45  
46  
47  
48  
49  
50  
51  
52  
53  
54  
55  
56  
57  
58  
59  
60

## Exploratory analyses

**Pre-registration and reporting:** Compared to unregistered or retrospectively registered studies, pre-registered studies were more likely to report complete information for randomization (type and method) and allocation concealment (OR 4.3; CI 1.9-10.0), whether all stakeholders were blinded (OR 8.6; CI 1.6-46.5), a priori sample size calculations (OR 2.5; CI 1.1-5.8), justifications for expected effect sizes used in power calculations (OR 2.5; CI 1.1-5.8), and specifying the primary outcome measure (OR 3.3; CI 1.5-7.1). The odds of reporting (OR 1.0; CI 0.48-2.1) or rejecting (OR 1.0; CI 0.42-2.6) the study hypothesis were not clearly different between unregistered and pre-registered studies.

**Sample size calculations and reporting:** The odds of rejecting the main hypothesis in trials with a priori sample calculations were unclear (OR 1.3; CI 0.6-2.8). Trials that provided justifications for the expected effect size were more likely to reject the study hypothesis (OR 2.5; CI 1.2-5.2).

**Flow charts and reporting:** The odds of reporting all reasons for dropouts (OR 4.6; CI 2.3-9.3) and explicitly reporting the number of participants in each group that were included in the data analysis (OR 163.3; CI 21.4-1248.5) were higher among studies that used flow charts to track participant flow, compared to those that did not.

## Discussion

Sports medicine and orthopedics researchers have recently emphasized rigorous study design and reporting to make research easier to understand, interpret, and translate into clinical practice (16). Calls for more transparent reporting in orthopedics and sports medicine (19,26,59) followed older studies suggesting that poor clinical trial reporting limits readers ability to assess study quality and risk of bias (13,60,61). Our study shows that while most studies include a general statement about rigor criteria, like blinding or randomization, these statements lack essential details needed to assess the risk of bias. The majority of trials report criteria related to the study sample, such as the sex of participants, inclusion and exclusion criteria, or the number of participants finally included in the analysis. Only 20% of studies were pre-registered. No study shared data in open repositories.

### Opportunities to improve reporting

These results highlight two main opportunities to improve transparency and reproducibility in sports medicine and orthopedics clinical trials; improving reporting for essential details of the main CONSORT elements and increasing uptake of open science practices.

First, our results indicate that most authors are aware that they need to address factors like blinding, randomization and sample size calculations; however, few provide the essential details required to evaluate the trial and interpret the results. Almost all trials addressed blinding, for example, but only 4% reported the blinding status of all main stakeholders. Educational efforts should emphasize the difference between informative and uninformative reporting (see example in Figure 4). CONSORT writing templates may also help (60). Target criteria should include the blinding status of all main stakeholders, randomization type and method, how and by whom concealed allocation was performed, and effect size justifications in sample size calculations.

**Figure 4** A priori sample size calculations are essential for generating meaningful results with clinical trials. Created by the authors.

1  
2  
3 Second, interventions are needed to increase pre-registration and data sharing. Although  
4 the ICJME has required clinical trial pre-registration since 2005 (61), only one-fifth of trials  
5 were pre-registered. Pre-registered studies had higher odds of reporting several rigor  
6 criteria, potentially suggesting that authors who preregister may be more aware of  
7 reporting guidelines. Our results are consistent with previous findings (62) that trial  
8 registrations were among the least reported CONSORT items in sports medicine. Sports  
9 medicine researchers have already noted that pre-registration and registered reports can  
10 prevent questionable research practice (26) (Table 1) or make them easier to detect (63).  
11  
12

13  
14 Data were not shared in public repositories, suggesting that this topic requires special  
15 attention. The benefits of data sharing for authors include more citations (64,65), and  
16 increased opportunities to collaborate with researchers who want to perform secondary  
17 analyses (66). Recent materials have addressed many common concerns about sharing  
18 patient data, including data privacy and confidentiality (67–69). Regulations vary by  
19 country and institution. Some institutions have designated support staff for data sharing.  
20 Researchers should contact their institutions' data privacy, statistics, or ethics offices to  
21 identify local experts. Seventy-four percent of trials with data availability statements noted  
22 that data were available on request. This is problematic, as such data are often  
23 unavailable and the odds of obtaining data decline precipitously with time since publication  
24 (70).  
25  
26  
27  
28  
29  
30  
31  
32  
33  
34  
35  
36  
37  
38  
39  
40  
41  
42  
43  
44  
45  
46  
47

48 Interestingly, our exploratory analysis revealed that the odds of rejecting the study  
49 hypothesis were 2.5 (CI 1.2-5.2) times higher in trials that provided a justification for the  
50 expected effect size in sample size calculations. This might indicate overinflated effect  
51 sizes, as trials that based their sample size calculation on effect sizes published in earlier  
52 studies more often failed to find a similar sized effect. Inflated effect sizes were also  
53  
54  
55  
56  
57  
58  
59



1  
2  
3 observed in the psychological science reproducibility project, where replicated effects  
4 were generally smaller than those in the initial studies (71).  
5

6  
7 Authors should also be encouraged to report the data analysis transparently. Our study  
8 shows that reporting of test statistics and degrees of freedom yields much potential for  
9 improvement, as well as reporting of standardized effect sizes and their precision.  
10 Focusing on the magnitude and precision of differences, instead making decisions based  
11 on p-value thresholds, reduces the likelihood of spurious findings (72,73). Twenty-five to  
12 38% of medical articles (74), and up to 50% in psychology papers (47), contain p-values  
13 that don't match the reported test-statistic and degrees of freedom. These inaccurate p-  
14 values may alter study conclusions in 13% of psychology papers (47). Our study shows  
15 that these assessments are impossible in sports medicine and orthopedics clinical trials,  
16 as test statistics and degrees of freedom are rarely reported.  
17  
18  
19  
20  
21  
22  
23  
24  
25  
26  
27  
28  
29  
30

31 Reporting of criteria related to the study sample and to exercise interventions highlighted  
32 some positive points. Whereas Costello et al. (75) observed that less than 40% of sports  
33 and exercise study participants were females, indicating sex bias, our study, on average,  
34 shows an even distribution of sex/gender. Similarly the number of participants included in  
35 the analysis was reported in 75% of trials in the present study, compared to 42% of  
36 randomized controlled trials in orthopedic journals (13). The introduction of flow charts to  
37 display the participant flow in CONSORT 2010 may improve reporting for sample related  
38 criteria, as trials which included flow charts were more likely to report the number of  
39 participants included in the analysis and reasons for all exclusions. While the majority of  
40 studies reported key details of exercise interventions, reporting was less comprehensive  
41 for the control intervention and for intervention adherence or compliance.  
42  
43  
44  
45  
46  
47  
48  
49  
50  
51  
52  
53  
54  
55  
56  
57  
58  
59  
60

## Options for systemic interventions to improve reporting

Ongoing reporting deficiencies in clinical trials highlight the need for systemic interventions to improve reporting. The 2010 CONSORT guideline has been endorsed by more than 50% of the core medical journals and the ICMJE (76). Persistent reporting deficiencies (12,21) indicate that endorsement without enforcement is insufficient (77,78), and engaging individuals, journals, funders, and institutions is necessary to improve reporting (79,80).

One option to improve reporting is for journals to enforce existing guidelines and policies. All journals in our sample were peer reviewed; yet there were major essential details were often missing from published trials. This suggests that peer review alone is insufficient. Alternatives include rigorous manual review by trained “trial reporting” assessors, automated screening or a combined approach. A journal program that trained early career researchers to check for common data visualization errors was well accepted by authors and increased compliance with data presentation guidelines (81). Implementing similar programs, using paid staff, could improve CONSORT compliance. Alternatively, automated screening tools may efficiently flag missing information for peer reviewers (82,83). Peer review systems at several journals include an automated tool that checks statistical reporting and guideline adherence (84). Tools are available to screen for risk of bias (RobotReviewer;RRID:SCR\_021064 (85)), and CONSORT methodology criteria (CONSORT-TM;RRID:SCR\_021051 (86)). The CONSORT tool performs well for frequently reported criteria, but needs more training data for less often reported criteria (86). New tools may be need to be created to assess details like the specifics of allocation concealment, blinding of specific stakeholders or justifications of expected effect sizes. As 52% of clinical trials in our sample were published in only five journals, systemic efforts to improve reporting on journal level can make a notable difference on clinical trial reporting in the field.

A second option is automated screening of sports medicine and orthopedics preprints. Preprints, which are posted on public servers such as medRxiv and sportRxiv prior to peer review, allow

1  
2  
3 authors to receive feedback and improve their manuscripts before journal submission. Large-scale  
4 automated screening of bioRxiv and medRxiv preprints for rigor and transparency criteria is  
5 feasible and could raise awareness about factors affecting transparency and reproducibility (87).  
6 Automated screening has limitations – the tools make mistakes and cannot always determine  
7 whether a particular item is relevant to a given study. Automated screening may complement peer  
8 review, but is not a replacement. The value of this approach will also depend on the proportion of  
9 trials that are posted as preprints.  
10  
11  
12  
13  
14  
15  
16  
17

18 Dashboards may offer a third option for improving reporting. Dashboards allow researchers to  
19 monitor changes over time and may incentivize transparent practices. Examples include  
20 dashboards on open science (88), and trial results reporting (89). In sports medicine and  
21 orthopedics, clinical trial dashboards could track transparent research practices for journals,  
22 society publishers, or all publications, and should include commonly missed items identified in this  
23 study. Researchers may need to develop new automated tools to track some criteria.  
24  
25  
26  
27  
28  
29  
30  
31

32 The scientific community has long relied on educational resources to improve reporting. On-  
33 demand resources include the CONSORT guideline use webinar by Altman (90), and open  
34 webinars on pre-registration, sample size justification and other topics offered by the Society for  
35 Transparency, Openness, and Replication in Kinesiology (91). Creating a single platform with  
36 field-relevant resources; then collaborating with large journals, publishers, and societies, may help  
37 to disseminate materials to the global orthopedics and sports medicine community.  
38  
39  
40  
41  
42  
43  
44

## 45 **Limitations**

46  
47  
48 Our CONSORT-based evaluation criteria for intervention reporting were not optimized for non-  
49 exercise or wait-and-see control interventions. While the assessments required by guidelines for  
50 intervention reporting (52,53) were beyond the scope of this study, previous studies assessed  
51 intervention reporting in detail (17,51,54,92). Larger, confirmatory studies are needed to examine  
52 relationships between different variables, as odds ratios calculated in the present study were  
53  
54  
55  
56  
57  
58  
59  
60

1  
2  
3 exploratory post-hoc calculations. We examined the top 25% sports medicine and orthopedics  
4 journals; hence our findings may not be generalizable to journals that are not indexed by PubMed,  
5 lower tier journals, or non-English journals.  
6  
7  
8  
9

## 10 Conclusions

11  
12  
13

14 Transparent reporting of clinical trials is essential to assess the risk of bias and translate research  
15 findings into clinical practice. Despite some improvements over time, older studies and studies in  
16 other fields show persisting deficiencies in clinical trial reporting. The present study in recent sports  
17 medicine and orthopedic clinical trials shows that authors often report general information on rigor  
18 criteria but few provide the essential details to assess risk of bias required by existing guidelines.  
19 Examples include the blinding status of all main stakeholders, information on the concealed  
20 assignment, or the justification of expected effect sizes in sample size calculations. Further,  
21 transparent research practices like pre-registration or data sharing are rarely used in sports  
22 medicine and orthopedics.  
23  
24  
25  
26  
27  
28  
29  
30  
31  
32

33  
34 As reporting guidelines for clinical trial reporting are long established and well accepted across  
35 medical fields, the persisting lack of detailed reporting suggests that further interventions and  
36 different approaches are needed to improve clinical trial reporting further. We present different  
37 options for future interventions might investigate rigorous peer-reviewer training, automated  
38 screening of submitted manuscripts and preprints, and field-specific dashboards to monitor  
39 reporting and transparent research practices to increase awareness and track improvements over  
40 time. Our results show which aspects of clinical trial reporting have the greatest need for  
41 improvement. Researchers can use this data to tailor future interventions to improve reporting to  
42 the needs of the sports medicine and orthopedics community.  
43  
44  
45  
46  
47  
48  
49  
50  
51  
52  
53  
54  
55  
56  
57  
58  
59  
60

## Data availability statement

All data are available on the OSF and may be accessed under the Creative Commons Attribution 4.0 International License at the following link: <https://osf.io/q8b46/>

## Contributorship statement

Conceptualization: Robert Schulz and Tracey Weissgerber.

Data curation: Robert Schulz and Georg Langen.

Formal analysis: Robert Schulz.

Investigation: Robert Schulz, Georg Langen, and Robert Prill.

Methodology: Robert Schulz and Tracey Weissgerber.

Project administration: Robert Schulz.

Supervision: Michael Cassel and Tracey Weissgerber.

Validation: Robert Schulz and Georg Langen.

Visualization: Robert Schulz and Tracey Weissgerber.

Writing - original draft: Robert Schulz and Tracey Weissgerber.

Writing - review & editing: Robert Schulz, Georg Langen, Robert Prill, Michael Cassel, and Tracey Weissgerber.

## Patient and public involvement

This meta-research study is not directly related to patients. Therefore, patients or the public were not involved in the design, or conduct, or reporting, or dissemination plans of our research.

## Research Ethics Approval

This is a meta-research study that does not involve human or animal participation and did not require ethical approval.

## Acknowledgements

We would like to acknowledge Mia Pattillo for her valuable contributions to extracting the registration status of trials.

## Funding

This research received no specific grant from any funding agency in the public, commercial, or not-for-profit sectors.

## Competing Interests

All authors declare no competing interests.

**Figure 1** Reporting prevalence for rigor and sample criteria. This plot displays the percentage of trials that addressed each criteria. For information on the actual randomization or blinding status, please refer to the text. The different colored data points are for better visual differentiation of each subcategory. Created by the authors.

**Figure 2** The blinding status across the main different stakeholder groups across all clinical trials (n=163). Created by the authors.

**Figure 3** Reporting prevalence for data analysis and transparency criteria. This plot displays the percentage of trials that addressed each criteria. Abbreviations: NHST, null hypothesis statistical testing; ES, effect size. Created by the authors.

**Figure 4** A priori sample size calculations are essential for generating meaningful results with clinical trials. Created by the authors.

## References

1. Emanuel EJ, Wendler D, Grady C. What makes clinical research ethical? *JAMA*. 2000;283(20):2701–11. doi:10.1001/jama.283.20.2701 Cited in: PubMed; PMID 10819955.
2. Califf RM, DeMets DL. Principles from clinical trials relevant to clinical practice: Part I. *Circulation*. 2002;106(8):1015–21. doi:10.1161/01.CIR.0000023260.78078.BB Cited in: PubMed; PMID 12186809.
3. Gerstein HC, McMurray J, Holman RR. Real-world studies no substitute for RCTs in establishing efficacy. *The Lancet*. 2019;393(10168):210–1. doi:10.1016/S0140-6736(18)32840-X
4. Zarin DA, Goodman SN, Kimmelman J. Harms From Uninformative Clinical Trials. *JAMA*. 2019. doi:10.1001/jama.2019.9892 Cited in: PubMed; PMID 31343666.
5. Feudtner C, Schreiner M, Lantos JD. Risks (and benefits) in comparative effectiveness research trials. *N Engl J Med*. 2013;369(10):892–4. doi:10.1056/NEJMp1309322 Cited in: PubMed; PMID 23964898.
6. van Delden JJM, van der Graaf R. Revised CIOMS International Ethical Guidelines for Health-Related Research Involving Humans. *JAMA*. 2017;317(2):135–6. doi:10.1001/jama.2016.18977 Cited in: PubMed; PMID 27923072.
7. Schulz KF, Altman DG, Moher D. CONSORT 2010 statement: updated guidelines for reporting parallel group randomised trials. *PLoS Med*. 2010;7(3):e1000251. doi:10.1371/journal.pmed.1000251 Cited in: PubMed; PMID 20352064.
8. Moher D, Hopewell S, Schulz KF, Montori V, Gøtzsche PC, Devereaux PJ, Elbourne D, Egger M, Altman DG. CONSORT 2010 explanation and elaboration: updated guidelines for reporting parallel group randomised trials. *BMJ*. 2010;340:c869. doi:10.1136/bmj.c869 Cited in: PubMed; PMID 20332511.
9. ICMJE. Recommendations for the Conduct, Reporting, Editing and Publication of Scholarly Work in Medical Journals [Internet]. 2020 [cited 2020 Aug 4]. Available from: <http://www.ICMJE.org>.
10. Moher D, Simera I, Schulz KF, Hoey J, Altman DG. Helping editors, peer reviewers and authors improve the clarity, completeness and transparency of reporting health research. *BMC Med*. 2008;6:13. doi:10.1186/1741-7015-6-13 Cited in: PubMed; PMID 18558004.
11. Turner L, Shamseer L, Altman DG, Schulz KF, Moher D. Does use of the CONSORT Statement impact the completeness of reporting of randomised controlled trials published in medical journals? A Cochrane review. *Syst Rev*. 2012;160. doi:10.1186/2046-4053-1-60 Cited in: PubMed; PMID 23194585.
12. Dechartres A, Trinquart L, Atal I, Moher D, Dickersin K, Boutron I, Perrodeau E, Altman DG, Ravaud P. Evolution of poor reporting and inadequate methods over time in 20 920 randomised controlled trials included in Cochrane reviews: research on research study. *BMJ*. 2017;357:j2490. doi:10.1136/bmj.j2490 Cited in: PubMed; PMID 28596181.
13. Chess LE, Gagnier J. Risk of bias of randomized controlled trials published in orthopaedic journals. *BMC Med Res Methodol*. 2013;13:76. doi:10.1186/1471-2288-13-76 Cited in: PubMed; PMID 23758875.
14. Nielsen RO, Shrier I, Casals M, Nettel-Aguirre A, Møller M, Bolling C, Bittencourt NFN, Clarsen B, Wedderkopp N, Soligard T, Timpka T, Emery C, Bahr R, Jacobsson J, Whiteley R, Dahlstrom O, van Dyk N, Pluim BM, Stamatakis E, Palacios-Derflinger L, Fagerland

- 1  
2  
3 MW, Khan KM, Ardern CL, Verhagen E. Statement on methods in sport injury research  
4 from the 1st METHODS MATTER Meeting, Copenhagen, 2019. *Br J Sports Med.*  
5 2020;54(15):941. doi:10.1136/bjsports-2019-101323 Cited in: PubMed; PMID 32371524.  
6
- 7 15. Zenko Z, Steele J, Mills J. *Communications in Kinesiology: A new open access journal*  
8 from the Society for Transparency, Openness, and Replication in Kinesiology; 2020. en.  
9
- 10 16. Verhagen E, Stovitz SD, Mansournia MA, Nielsen RO, Shrier I. BJSM educational  
11 editorials: methods matter. *Br J Sports Med.* 2018;52(18):1159–60. doi:10.1136/bjsports-  
12 2017-097998 Cited in: PubMed; PMID 28818955.
- 13 17. Holden S, Rathleff MS, Jensen MB, Barton CJ. How can we implement exercise therapy  
14 for patellofemoral pain if we don't know what was prescribed? A systematic review. *Br J*  
15 *Sports Med.* 2018;52(6):385. doi:10.1136/bjsports-2017-097547 Cited in: PubMed; PMID  
16 29084726.
- 17 18. Losina E. Why past research successes do not translate to clinical reality: gaps in  
18 evidence on exercise program efficacy. *Osteoarthritis Cartilage.* 2019;27(1):1–2.  
19 doi:10.1016/j.joca.2018.09.006 Cited in: PubMed; PMID 30248501.
- 20 19. Knudson D. Confidence crisis of results in biomechanics research. *Sports Biomech.*  
21 2017;16(4):425–33. doi:10.1080/14763141.2016.1246603 Cited in: PubMed; PMID  
22 28632059.
- 23 20. Büttner F, Toomey E, McClean S, Roe M, Delahunt E. Are questionable research  
24 practices facilitating new discoveries in sport and exercise medicine? The proportion of  
25 supported hypotheses is implausibly high. *Br J Sports Med.* 2020. doi:10.1136/bjsports-  
26 2019-101863 Cited in: PubMed; PMID 32699001.
- 27 21. Kane RL, Wang J, Garrard J. Reporting in randomized clinical trials improved after  
28 adoption of the CONSORT statement. *J Clin Epidemiol.* 2007;60(3):241–9.  
29 doi:10.1016/j.jclinepi.2006.06.016 Cited in: PubMed; PMID 17292017.
- 30 22. Banks GC, O'Boyle EH, Pollack JM, White CD, Batchelor JH, Whelpley CE, Abston KA,  
31 Bennett AA, Adkins CL. Questions About Questionable Research Practices in the Field of  
32 Management. *Journal of Management.* 2016;42(1):5–20. doi:10.1177/0149206315619011  
33
- 34 23. Hutton JL, Williamson PR. Bias in meta-analysis due to outcome variable selection within  
35 studies. *Journal of the Royal Statistical Society: Series C (Applied Statistics).*  
36 2000;49(3):359–70. doi:10.1111/1467-9876.00197
- 37 24. Bernard R, Weissgerber TL, Bobrov E, Winham SJ, Dirnagl U, Riedel N. fiddle: a tool to  
38 combat publication bias by getting research out of the file drawer and into the scientific  
39 community. *Clin Sci (Lond).* 2020;134(20):2729–39. doi:10.1042/CS20201125 Cited in:  
40 PubMed; PMID 33111948.
- 41 25. Chambers C. What's next for Registered Reports? *Nature.* 2019;573(7773):187–9.  
42 doi:10.1038/d41586-019-02674-6 Cited in: PubMed; PMID 31506624.
- 43 26. Caldwell AR, Vigotsky AD, Tenan MS, Radel R, Mellor DT, Kreutzer A, Lahart IM, Mills JP,  
44 Boisgontier MP. Moving Sport and Exercise Science Forward: A Call for the Adoption of  
45 More Transparent Research Practices. *Sports Med.* 2020;50(3):449–59.  
46 doi:10.1007/s40279-019-01227-1 Cited in: PubMed; PMID 32020542.
- 47 27. Chalmers I. Underreporting Research Is Scientific Misconduct. *JAMA.* 1990;263(10):1405.  
48 doi:10.1001/jama.1990.03440100121018
- 49 28. Hopewell S, Loudon K, Clarke MJ, Oxman AD, Dickersin K. Publication bias in clinical  
50 trials due to statistical significance or direction of trial results. *Cochrane Database Syst*  
51  
52  
53  
54  
55  
56  
57  
58  
59



- 1  
2  
3 Rev. 2009;(1):MR000006. doi:10.1002/14651858.MR000006.pub3 Cited in: PubMed;  
4 PMID 19160345.
- 5  
6 29. Dwan K, Gamble C, Williamson PR, Kirkham JJ. Systematic review of the empirical  
7 evidence of study publication bias and outcome reporting bias - an updated review. PLoS  
8 ONE. 2013;8(7):e66844. doi:10.1371/journal.pone.0066844 Cited in: PubMed; PMID  
9 23861749.
- 10  
11 30. Kirkham JJ, Altman DG, Chan A-W, Gamble C, Dwan KM, Williamson PR. Outcome  
12 reporting bias in trials: a methodological approach for assessment and adjustment in  
13 systematic reviews. BMJ. 2018;362k3802. doi:10.1136/bmj.k3802 Cited in: PubMed; PMID  
14 30266736.
- 15  
16 31. Nunan D, Aronson J, Bankhead C. Catalogue of bias: attrition bias. BMJ Evid Based Med.  
17 2018;23(1):21–2. doi:10.1136/ebmed-2017-110883 Cited in: PubMed; PMID 29367321.
- 18  
19 32. ICMJE. Recommendations | Preparing a Manuscript for Submission to a Medical Journal:  
20 Methods - statistics [Internet]. 2021 [updated 2021 Apr 14; cited 2021 Apr 14]. Available  
21 from: [http://www.icmje.org/recommendations/browse/manuscript-preparation/preparing-](http://www.icmje.org/recommendations/browse/manuscript-preparation/preparing-for-submission.html)  
22 [for-submission.html](http://www.icmje.org/recommendations/browse/manuscript-preparation/preparing-for-submission.html)
- 23  
24 33. Kerr NL. HARKing: hypothesizing after the results are known. Pers Soc Psychol Rev.  
25 1998;2(3):196–217. doi:10.1207/s15327957pspr0203\_4 Cited in: PubMed; PMID  
26 15647155.
- 27  
28 34. SCImago (nd). SJR — SCImago Journal & Country Rank [Portal] [Internet]. 2020 [cited  
29 2021 Feb 22]. Available from: <https://www.scimagojr.com/journalrank.php?category=2732>
- 30  
31 35. Ouzzani M, Hammady H, Fedorowicz Z, Elmagarmid A. Rayyan-a web and mobile app for  
32 systematic reviews. Syst Rev. 2016;5(1):210. doi:10.1186/s13643-016-0384-4 Cited in:  
33 PubMed; PMID 27919275.
- 34  
35 36. BIH QUEST. Open Science - BIH [Internet]. 2021 [updated 2021 Jan 22; cited  
36 2021 Jan 22]. Available from: [https://www.bihealth.org/en/research/quest-center/mission-](https://www.bihealth.org/en/research/quest-center/mission-approaches/open-science)  
37 [approaches/open-science](https://www.bihealth.org/en/research/quest-center/mission-approaches/open-science)
- 38  
39 37. Nosek BA, Alter G, Banks GC, Borsboom D, Bowman SD, Breckler SJ, Buck S, Chambers  
40 CD, Chin G, Christensen G, Contestabile M, Dafoe A, Eich E, Freese J, Glennerster R,  
41 Goroff D, Green DP, Hesse B, Humphreys M, Ishiyama J, Karlan D, Kraut A, Lupia A,  
42 Mabry P, Madon TA, Malhotra N, Mayo-Wilson E, McNutt M, Miguel E, Paluck EL,  
43 Simonsohn U, Soderberg C, Spellman BA, Turitto J, VandenBos G, Vazire S,  
44 Wagenmakers EJ, Wilson R, Yarkoni T. SCIENTIFIC STANDARDS. Promoting an open  
45 research culture. Science. 2015;348(6242):1422–5. doi:10.1126/science.aab2374 Cited in:  
46 PubMed; PMID 26113702.
- 47  
48 38. Button KS, Ioannidis JPA, Mokrysz C, Nosek BA, Flint J, Robinson ESJ, Munafò MR.  
49 Power failure: why small sample size undermines the reliability of neuroscience. Nat Rev  
50 Neurosci. 2013;14(5):365–76. doi:10.1038/nrn3475 Cited in: PubMed; PMID 23571845.
- 51  
52 39. Charles P, Giraudeau B, Dechartres A, Baron G, Ravaud P. Reporting of sample size  
53 calculation in randomised controlled trials: review. BMJ. 2009;338b1732.  
54 doi:10.1136/bmj.b1732 Cited in: PubMed; PMID 19435763.
- 55  
56 40. Abdul Latif L, Daud Amadera JE, Pimentel D, Pimentel T, Fregni F. Sample size  
57 calculation in physical medicine and rehabilitation: a systematic review of reporting,  
58 characteristics, and results in randomized controlled trials. Arch Phys Med Rehabil.  
59 2011;92(2):306–15. doi:10.1016/j.apmr.2010.10.003 Cited in: PubMed; PMID 21272730.

- 1  
2  
3 41. Hewitt C, Hahn S, Torgerson DJ, Watson J, Bland JM. Adequacy and reporting of  
4 allocation concealment: review of recent trials published in four general medical journals.  
5 BMJ. 2005;330(7499):1057–8. doi:10.1136/bmj.38413.576713.AE Cited in: PubMed;  
6 PMID 15760970.  
7
- 8 42. Armijo-Olivo S, Saltaji H, da Costa BR, Fuentes J, Ha C, Cummings GG. What is the  
9 influence of randomisation sequence generation and allocation concealment on treatment  
10 effects of physical therapy trials? A meta-epidemiological study. BMJ Open.  
11 2015;5(9):e008562. doi:10.1136/bmjopen-2015-008562 Cited in: PubMed; PMID  
12 26338841.  
13
- 14 43. Holman L, Head ML, Lanfear R, Jennions MD. Evidence of Experimental Bias in the Life  
15 Sciences: Why We Need Blind Data Recording. PLoS Biol. 2015;13(7):e1002190.  
16 doi:10.1371/journal.pbio.1002190 Cited in: PubMed; PMID 26154287.  
17
- 18 44. Haahr MT, Hróbjartsson A. Who is blinded in randomized clinical trials? A study of 200  
19 trials and a survey of authors. Clin Trials. 2006;3(4):360–5.  
20 doi:10.1177/1740774506069153 Cited in: PubMed; PMID 17060210.  
21
- 22 45. Mathieu S, Boutron I, Moher D, Altman DG, Ravaud P. Comparison of registered and  
23 published primary outcomes in randomized controlled trials. JAMA. 2009;302(9):977–84.  
24 doi:10.1001/jama.2009.1242 Cited in: PubMed; PMID 19724045.  
25
- 26 46. Chen T, Li C, Qin R, Wang Y, Yu D, Dodd J, Wang D, Cornelius V. Comparison of Clinical  
27 Trial Changes in Primary Outcome and Reported Intervention Effect Size Between Trial  
28 Registration and Publication. JAMA Netw Open. 2019;2(7):e197242.  
29 doi:10.1001/jamanetworkopen.2019.7242 Cited in: PubMed; PMID 31322690.  
30
- 31 47. Nuijten MB, Hartgerink CHJ, van Assen MALM, Epskamp S, Wicherts JM. The prevalence  
32 of statistical reporting errors in psychology (1985-2013). Behav Res Methods.  
33 2016;48(4):1205–26. doi:10.3758/s13428-015-0664-2 Cited in: PubMed; PMID 26497820.  
34
- 35 48. Lakens D. Calculating and reporting effect sizes to facilitate cumulative science: a practical  
36 primer for t-tests and ANOVAs. Front Psychol. 2013;4:863. doi:10.3389/fpsyg.2013.00863  
37 Cited in: PubMed; PMID 24324449.  
38
- 39 49. Weissgerber TL, Milic NM, Winham SJ, Garovic VD. Beyond bar and line graphs: time for  
40 a new data presentation paradigm. PLoS Biol. 2015;13(4):e1002128.  
41 doi:10.1371/journal.pbio.1002128 Cited in: PubMed; PMID 25901488.  
42
- 43 50. Weissgerber TL, Winham SJ, Heinzen EP, Milin-Lazovic JS, Garcia-Valencia O, Bukumiric  
44 Z, Savic MD, Garovic VD, Milic NM. Reveal, Don't Conceal: Transforming Data  
45 Visualization to Improve Transparency. Circulation. 2019;140(18):1506–18.  
46 doi:10.1161/CIRCULATIONAHA.118.037777 Cited in: PubMed; PMID 31657957.  
47
- 48 51. Slade SC, Keating JL. Exercise prescription: a case for standardised reporting. Br J Sports  
49 Med. 2012;46(16):1110–3. doi:10.1136/bjsports-2011-090290 Cited in: PubMed; PMID  
50 22089077.  
51
- 52 52. Hoffmann TC, Glasziou PP, Boutron I, Milne R, Perera R, Moher D, Altman DG, Barbour  
53 V, Macdonald H, Johnston M, Lamb SE, Dixon-Woods M, McCulloch P, Wyatt JC, Chan  
54 A-W, Michie S. Better reporting of interventions: template for intervention description and  
55 replication (TIDieR) checklist and guide. BMJ. 2014;348:g1687. doi:10.1136/bmj.g1687  
56 Cited in: PubMed; PMID 24609605.  
57
- 58 53. Slade SC, Dionne CE, Underwood M, Buchbinder R, Beck B, Bennell K, Brosseau L,  
59 Costa L, Cramp F, Cup E, Feehan L, Ferreira M, Forbes S, Glasziou P, Habets B, Harris  
60 S, Hay-Smith J, Hillier S, Hinman R, Holland A, Hondras M, Kelly G, Kent P, Lauret G-J,

- 1  
2  
3 Long A, Maher C, Morso L, Osteras N, Peterson T, Quinlivan R, Rees K, Regnaud J-P,  
4 Rietberg M, Saunders D, Skoetz N, Sogaard K, Takken T, van Tulder M, Voet N, Ward L,  
5 White C. Consensus on Exercise Reporting Template (CERT): Modified Delphi Study.  
6 *Phys Ther*. 2016;96(10):1514–24. doi:10.2522/ptj.20150668 Cited in: PubMed; PMID  
7 27149962.  
8
- 9 54. Verhagen EALM, Hupperets MDW, Finch CF, van Mechelen W. The impact of adherence  
10 on sports injury prevention effect estimates in randomised controlled trials: looking beyond  
11 the CONSORT statement. *J Sci Med Sport*. 2011;14(4):287–92.  
12 doi:10.1016/j.jsams.2011.02.007 Cited in: PubMed; PMID 21429793.  
13
- 14 55. ICMJE. Recommendations | Clinical Trials [Internet]. 2021 [updated 2021 Jan 19; cited  
15 2021 Jan 19]. Available from: [http://www.icmje.org/recommendations/browse/publishing-](http://www.icmje.org/recommendations/browse/publishing-and-editorial-issues/clinical-trial-registration.html)  
16 [and-editorial-issues/clinical-trial-registration.html](http://www.icmje.org/recommendations/browse/publishing-and-editorial-issues/clinical-trial-registration.html)  
17
- 18 56. McKiernan EC, Bourne PE, Brown CT, Buck S, Kenall A, Lin J, McDougall D, Nosek BA,  
19 Ram K, Soderberg CK, Spies JR, Thaney K, Updegrove A, Woo KH, Yarkoni T. How open  
20 science helps researchers succeed. *Elife*. 2016;5. doi:10.7554/eLife.16800 Cited in:  
21 PubMed; PMID 27387362.
- 22 57. Vasilevsky NA, Minnier J, Haendel MA, Champieux RE. Reproducible and reusable  
23 research: are journal data sharing policies meeting the mark? *PeerJ*. 2017;5e3208.  
24 doi:10.7717/peerj.3208 Cited in: PubMed; PMID 28462024.  
25
- 26 58. European Commission. Facts and Figures for open research data: Figures and case studies  
27 related to accessing and reusing the data produced in the course of scientific production.  
28 [Internet]. 2019 [updated 2019 Nov 5; cited 2021 Apr 8]. Available from:  
29 [https://ec.europa.eu/info/research-and-innovation/strategy/goals-research-and-innovation-](https://ec.europa.eu/info/research-and-innovation/strategy/goals-research-and-innovation-policy/open-science/open-science-monitor/facts-and-figures-open-research-data_en#funderspolicies)  
30 [policy/open-science/open-science-monitor/facts-and-figures-open-research-](https://ec.europa.eu/info/research-and-innovation/strategy/goals-research-and-innovation-policy/open-science/open-science-monitor/facts-and-figures-open-research-data_en#funderspolicies)  
31 [data\\_en#funderspolicies](https://ec.europa.eu/info/research-and-innovation/strategy/goals-research-and-innovation-policy/open-science/open-science-monitor/facts-and-figures-open-research-data_en#funderspolicies)  
32
- 33 59. Halperin I, Vigotsky AD, Foster C, Pyne DB. Strengthening the Practice of Exercise and  
34 Sport-Science Research. *Int J Sports Physiol Perform*. 2018;13(2):127–34.  
35 doi:10.1123/ijsp.2017-0322 Cited in: PubMed; PMID 28787228.  
36
- 37 60. Barnes C, Boutron I, Giraudeau B, Porcher R, Altman DG, Ravaud P. Impact of an online  
38 writing aid tool for writing a randomized trial report: the COBWEB (Consort-based WEB  
39 tool) randomized controlled trial. *BMC Med*. 2015;13(1):221. doi:10.1186/s12916-015-  
40 0460-y Cited in: PubMed; PMID 26370288.
- 41 61. Angelis C de, Drazen JM, Frizelle FA, Haug C, Hoey J, Horton R, Kotzin S, Laine C,  
42 Marusic A, Overbeke AJPM, Schroeder TV, Sox HC, van der Weyden MB. Clinical trial  
43 registration: a statement from the International Committee of Medical Journal Editors. *Ann*  
44 *Intern Med*. 2004;141(6):477–8. doi:10.7326/0003-4819-141-6-200409210-00109 Cited in:  
45 PubMed; PMID 15355883.  
46
- 47 62. Harris JD, Cvetanovich G, Erickson BJ, Abrams GD, Chahal J, Gupta AK, McCormick FM,  
48 Bach BR. Current status of evidence-based sports medicine. *Arthroscopy*.  
49 2014;30(3):362–71. doi:10.1016/j.arthro.2013.11.015 Cited in: PubMed; PMID 24581261.  
50
- 51 63. Warren M. First analysis of 'pre-registered' studies shows sharp rise in null findings.  
52 *Nature*. 2018. doi:10.1038/d41586-018-07118-1  
53
- 54 64. Christensen G, Dafoe A, Miguel E, Moore DA, Rose AK. A study of the impact of data  
55 sharing on article citations using journal policies as a natural experiment. *PLOS ONE*.  
56 2019;14(12):e0225883. doi:10.1371/journal.pone.0225883 Cited in: PubMed; PMID  
57 31851689.  
58  
59

- 1  
2  
3 65. Colavizza G, Hrynaskiewicz I, Staden I, Whitaker K, McGillivray B. The citation  
4 advantage of linking publications to research data. *PLOS ONE*. 2020;15(4):e0230416.  
5 doi:10.1371/journal.pone.0230416 Cited in: PubMed; PMID 32320428.  
6
- 7 66. Lo B, DeMets DL. Incentives for Clinical Trialists to Share Data. *N Engl J Med*.  
8 2016;375(12):1112–5. doi:10.1056/NEJMp1608351 Cited in: PubMed; PMID 27653562.  
9
- 10 67. Mello MM, Francer JK, Wilenzick M, Teden P, Bierer BE, Barnes M. Preparing for  
11 responsible sharing of clinical trial data. *N Engl J Med*. 2013;369(17):1651–8.  
12 doi:10.1056/NEJMHle1309073 Cited in: PubMed; PMID 24144394.
- 13 68. Taichman DB, Sahni P, Pinborg A, Peiperl L, Laine C, James A, Hong S-T, Haileamlak A,  
14 Gollogly L, Godlee F, Frizelle FA, Florenzano F, Drazen JM, Bauchner H, Baethge C,  
15 Backus J. Data Sharing Statements for Clinical Trials - A Requirement of the International  
16 Committee of Medical Journal Editors. *N Engl J Med*. 2017;376(23):2277–9.  
17 doi:10.1056/NEJMe1705439 Cited in: PubMed; PMID 28581902.  
18
- 19 69. Keerie C, Tuck C, Milne G, Eldridge S, Wright N, Lewis SC. Data sharing in clinical trials -  
20 practical guidance on anonymising trial datasets. *Trials*. 2018;19(1):25.  
21 doi:10.1186/s13063-017-2382-9 Cited in: PubMed; PMID 29321053.  
22
- 23 70. Vines TH, Albert AYK, Andrew RL, Débarre F, Bock DG, Franklin MT, Gilbert KJ, Moore J-  
24 S, Renaut S, Rennison DJ. The availability of research data declines rapidly with article  
25 age. *Curr Biol*. 2014;24(1):94–7. doi:10.1016/j.cub.2013.11.014 Cited in: PubMed; PMID  
26 24361065.
- 27 71. Nosek B. Estimating the reproducibility of psychological science. *Science*.  
28 2015;349(6251):aac4716. doi:10.1126/science.aac4716 Cited in: PubMed; PMID  
29 26315443.  
30
- 31 72. Bernards JR, Sato K, Haff GG, Bazylar CD. Current Research and Statistical Practices in  
32 Sport Science and a Need for Change. *Sports (Basel)*. 2017;5(4).  
33 doi:10.3390/sports5040087 Cited in: PubMed; PMID 29910447.  
34
- 35 73. Riemann BL, Lininger MR. Principles of Statistics: What the Sports Medicine Professional  
36 Needs to Know. *Clin Sports Med*. 2018;37(3):375–86. doi:10.1016/j.csm.2018.03.004  
37 Cited in: PubMed; PMID 29903380.
- 38 74. García-Berthou E, Alcaraz C. Incongruence between test statistics and P values in  
39 medical papers. *BMC Med Res Methodol*. 2004;4(1):13. doi:10.1186/1471-2288-4-13  
40 Cited in: PubMed; PMID 15169550.  
41
- 42 75. Costello JT, Bieuzen F, Bleakley CM. Where are all the female participants in Sports and  
43 Exercise Medicine research? *Eur J Sport Sci*. 2014;14(8):847–51.  
44 doi:10.1080/17461391.2014.911354 Cited in: PubMed; PMID 24766579.  
45
- 46 76. CONSORT. Consort - Endorsers [Internet]. 2021 [updated 2021 Mar 19; cited  
47 2021 Mar 19]. Available from: <http://www.consort-statement.org/about-consort/endorsers1>
- 48 77. Hirst A, Altman DG. Are peer reviewers encouraged to use reporting guidelines? A survey  
49 of 116 health research journals. *PLoS ONE*. 2012;7(4):e35621.  
50 doi:10.1371/journal.pone.0035621 Cited in: PubMed; PMID 22558178.  
51
- 52 78. Shamseer L, Hopewell S, Altman DG, Moher D, Schulz KF. Update on the endorsement of  
53 CONSORT by high impact factor journals: a survey of journal "Instructions to Authors" in  
54 2014. *Trials*. 2016;17(1):301. doi:10.1186/s13063-016-1408-z Cited in: PubMed; PMID  
55 27343072.  
56  
57  
58  
59  
60

- 1  
2  
3 79. MacLeod MR, Michie S, Roberts I, Dirnagl U, Chalmers I, Ioannidis JPA, Salman RA-S, Chan A-W, Glasziou P. Biomedical research: increasing value, reducing waste. *The Lancet*. 2014;383(9912):101–4. doi:10.1016/S0140-6736(13)62329-6
- 4  
5  
6  
7 80. Moher D. Reporting guidelines: doing better for readers. *BMC Med*. 2018;16(1):233. doi:10.1186/s12916-018-1226-0 Cited in: PubMed; PMID 30545364.
- 8  
9  
10 81. Keehan KH, Gaffney MC, Zucker IH. CORP: Assessing author compliance with data presentation guidelines for manuscript figures. *Am J Physiol Heart Circ Physiol*. 2020;318(5):H1051-H1058. doi:10.1152/ajpheart.00071.2020 Cited in: PubMed; PMID 32196356.
- 11  
12  
13  
14 82. Halffman W, Horbach SPJM. What are innovations in peer review and editorial assessment for? *Genome Biol*. 2020;21(1):87. doi:10.1186/s13059-020-02004-4 Cited in: PubMed; PMID 32362286.
- 15  
16  
17  
18 83. Checco A, Bracciale L, Loreti P, Pinfield S, Bianchi G. AI-assisted peer review. *Humanit Soc Sci Commun*. 2021;8(1):1–11. En;en. doi:10.1057/s41599-020-00703-8
- 19  
20  
21 84. BMC. Advancing peer review at BMC [Internet]. 2021 [updated 2021 Apr 8; cited 2021 Apr 8]. Available from: <https://www.biomedcentral.com/about/advancing-peer-review>
- 22  
23  
24 85. Soboczenski F, Trikalinos TA, Kuiper J, Bias RG, Wallace BC, Marshall IJ. Machine learning to help researchers evaluate biases in clinical trials: a prospective, randomized user study. *BMC Med Inform Decis Mak*. 2019;19(1):96. doi:10.1186/s12911-019-0814-z Cited in: PubMed; PMID 31068178.
- 25  
26  
27  
28 86. Kilicoglu H, Rosemblat G, Hoang L, Wadhwa S, Peng Z, Malički M, Schneider J, Ter Riet G. Toward assessing clinical trial publications for reporting transparency. *J Biomed Inform*. 2021;116:103717. doi:10.1016/j.jbi.2021.103717 Cited in: PubMed; PMID 33647518.
- 29  
30  
31 87. Weissgerber T, Riedel N, Kilicoglu H, Labbé C, Eckmann P, Ter Riet G, Byrne J, Cabanac G, Capes-Davis A, Favier B, Saladi S, Grabitz P, Bannach-Brown A, Schulz R, McCann S, Bernard R, Bandrowski A. Automated screening of COVID-19 preprints: can we help authors to improve transparency and reproducibility? *Nat Med*. 2021;27(1):6–7. doi:10.1038/s41591-020-01203-7 Cited in: PubMed; PMID 33432174.
- 32  
33  
34  
35  
36  
37 88. European Commission. Open science monitor [Internet]. 2018 [updated 2018 Nov 7; cited 2021 Apr 10]. Available from: [https://ec.europa.eu/info/research-and-innovation/strategy/goals-research-and-innovation-policy/open-science/open-science-monitor\\_en](https://ec.europa.eu/info/research-and-innovation/strategy/goals-research-and-innovation-policy/open-science/open-science-monitor_en)
- 38  
39  
40  
41  
42 89. EU Trials Tracker. EU Trials Tracker — Who's not sharing clinical trial results? [Internet]: Evidence-Based Medicine Data Lab; University of Oxford. 2021 [updated 2021 Apr 12; cited 2021 Apr 12]. Available from: <https://eu.trialstracker.net/>
- 43  
44  
45  
46 90. Altman DG. WEBINAR: Doug Altman – CONSORT Statement guidance for reporting randomised trials | The EQUATOR Network [Internet]: EQUATOR. 2013 [updated 2021 Apr 8; cited 2021 Apr 8]. Available from: <https://www.equator-network.org/2013/06/24/webinar-doug-altman-consort-statement-guidance-for-reporting-randomised-trials/>
- 47  
48  
49  
50  
51 91. Society for Transparency, Openness, and Replication in Kinesiology. Stork - Resources [Internet]. 2021 [updated 2021 Apr 8; cited 2021 Apr 8]. Available from: <https://storkinesiology.org/resources/>
- 52  
53  
54  
55 92. Hoffmann TC, Eructi C, Glasziou PP. Poor description of non-pharmacological interventions: analysis of consecutive sample of randomised trials. *BMJ*. 2013;347:f3755. doi:10.1136/bmj.f3755 Cited in: PubMed; PMID 24021722.
- 56  
57  
58  
59  
60

1  
2  
3  
4  
5  
6  
7  
8  
9  
10  
11  
12  
13  
14  
15  
16  
17  
18  
19  
20  
21  
22  
23  
24  
25  
26  
27  
28  
29  
30  
31  
32  
33  
34  
35  
36  
37  
38  
39  
40  
41  
42  
43  
44  
45  
46  
47  
48  
49  
50  
51  
52  
53  
54  
55  
56  
57  
58  
59  
60

For peer review only

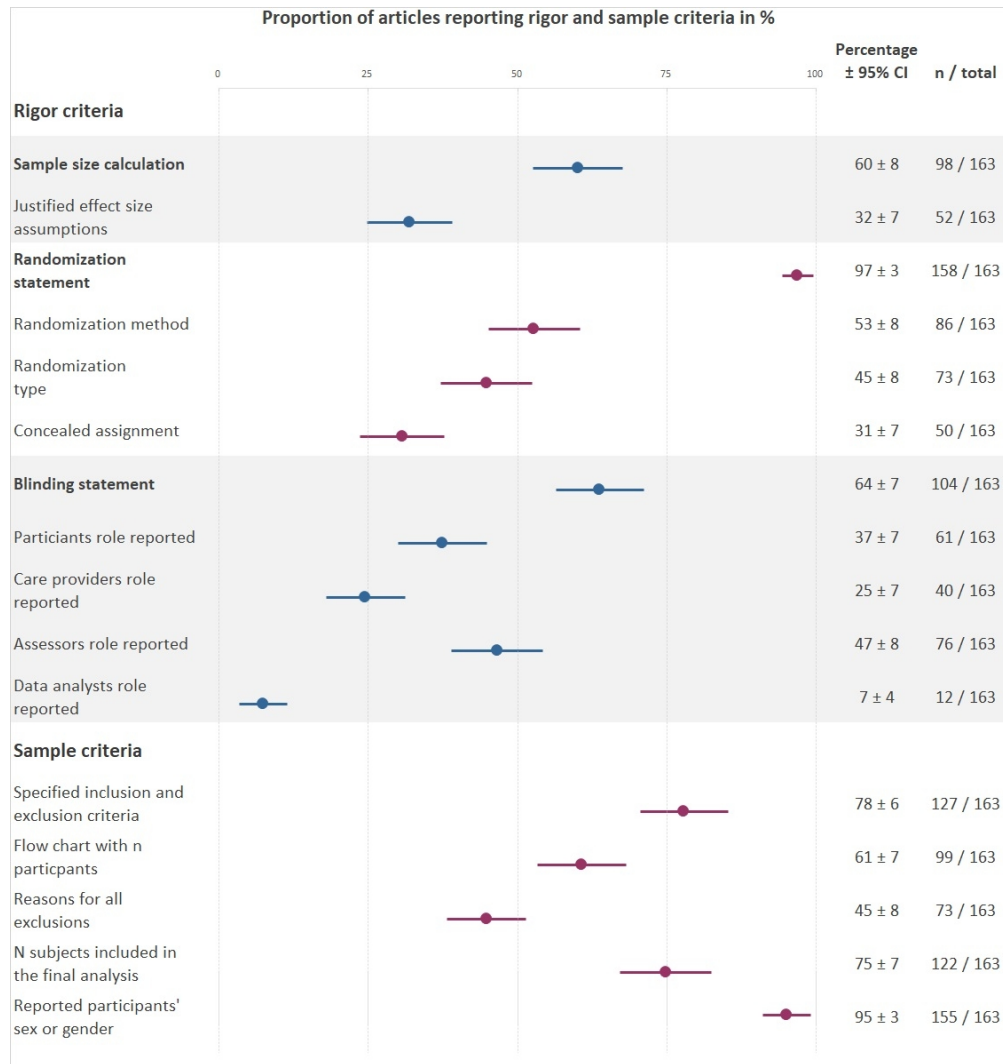

Figure 1 Reporting prevalence for rigor and sample criteria. This plot displays the percentage of trials that addressed each criteria. For information on the actual randomization or blinding status, please refer to the text. The different colored data points are for better visual differentiation of each subcategory. Created by the authors.

298x315mm (96 x 96 DPI)

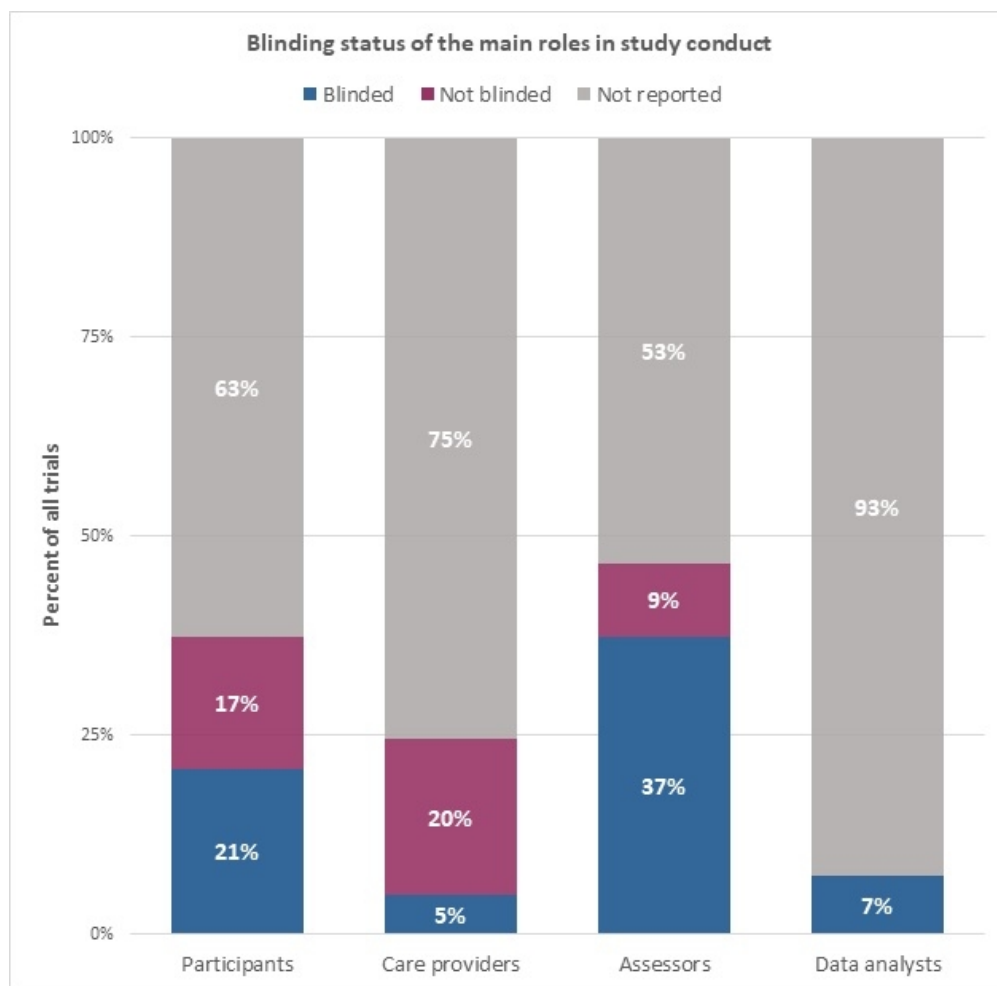

Figure 2 The blinding status across the main different stakeholder groups across all clinical trials (n=163).  
Created by the authors.

110x108mm (144 x 144 DPI)



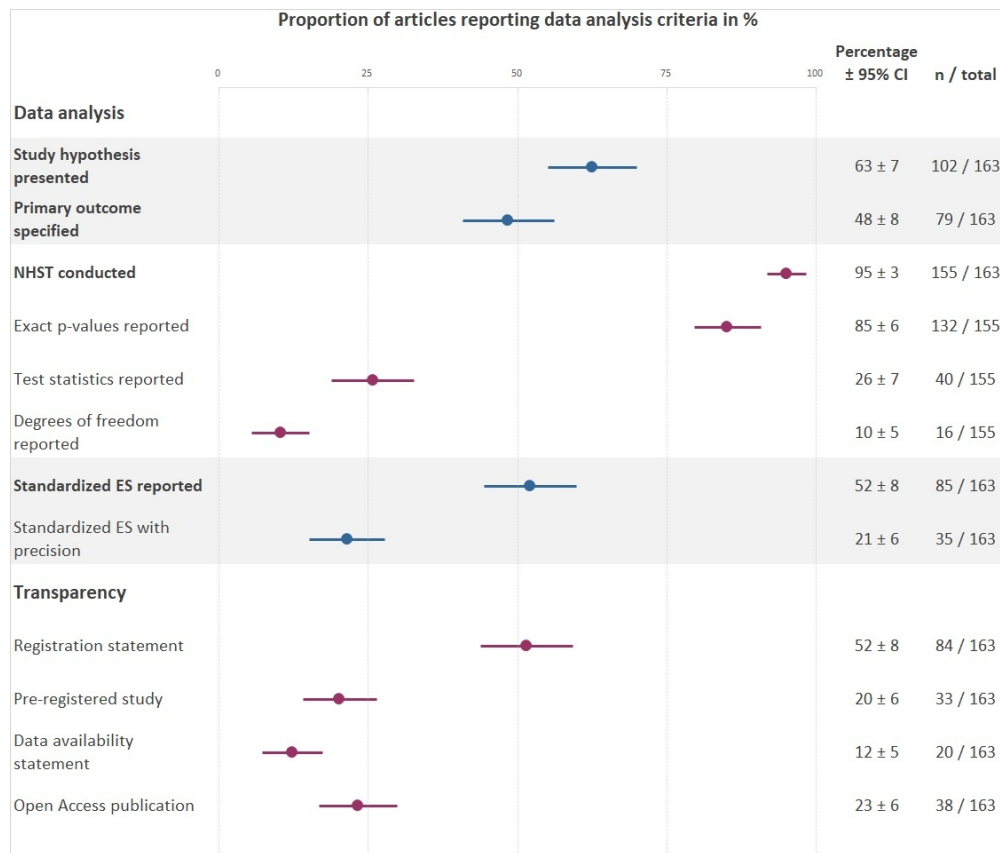

Figure 3 Reporting prevalence for data analysis and transparency criteria. This plot displays the percentage of trials that addressed each criteria. Abbreviations: NHST, null hypothesis statistical testing; ES, effect size. Created by the authors.

298x252mm (96 x 96 DPI)

1  
2  
3  
4  
5  
6  
7  
8  
9  
10  
11  
12  
13  
14  
15  
16  
17  
18  
19  
20  
21  
22  
23  
24  
25  
26  
27  
28  
29  
30  
31  
32  
33  
34  
35  
36  
37  
38  
39  
40  
41  
42  
43  
44  
45  
46  
47  
48  
49  
50  
51  
52  
53  
54  
55  
56  
57  
58  
59  
60

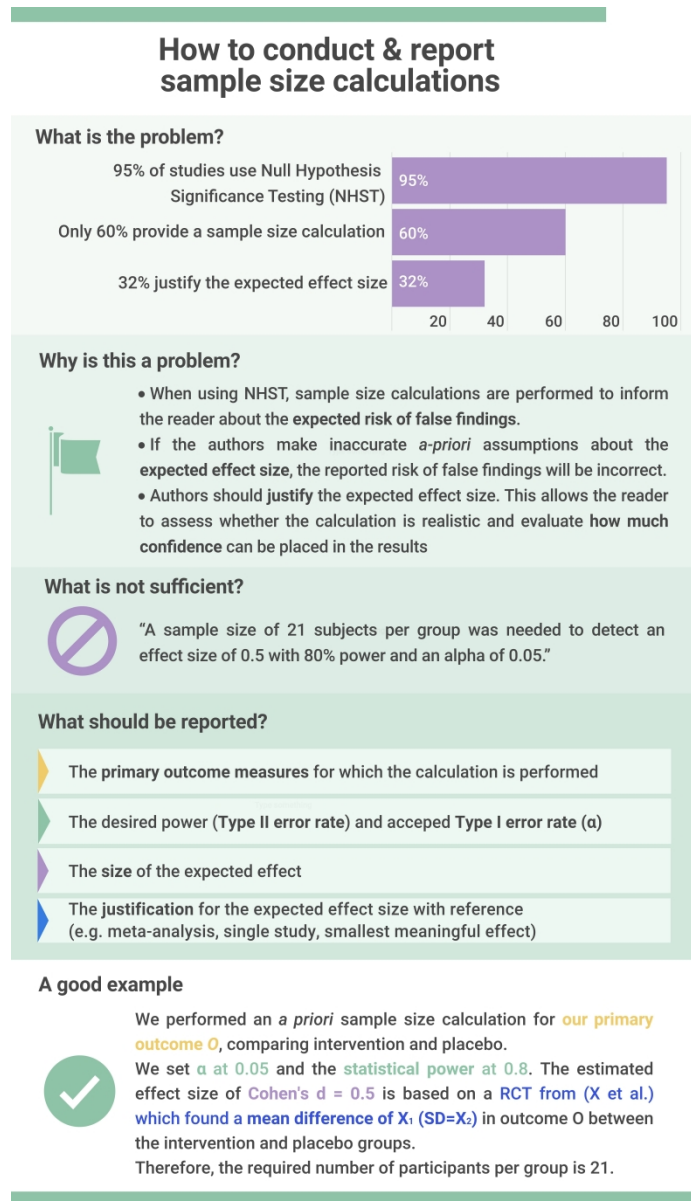

Figure 4 A priori sample size calculations are essential for generating meaningful results with clinical trials. Created by the authors.

1100x1903mm (96 x 96 DPI)

# The devil is in the details: Reporting and transparent research practices in orthopedic and sports medicine clinical trials

## Supplemental material

### Methods

#### Sample Size Calculation

This exploratory study does not require formal sample size calculations. However, conventionally, sample sizes between 30 and 150 subjects or items are recommended for exploratory study designs with non-probability sampling (1).

For information purposes only, a precision-based sample size estimation was performed to obtain rough estimates of relevant sample sizes. We assumed that three-quarters of articles would report the criteria (0.75), the margin of error would be 0.05, and a level of confidence of 0.8. These assumptions result in a calculated sample size of 124 articles. The estimated proportion was based on previous investigations in general medical journals (2–5). While the reporting prevalence varied substantially depending on the criterion, we chose an estimated reporting proportion of 75%, as the proportion of trials reporting information for risk of bias assessment was between 60 and 80% for most rigor criteria, and the latest large analysis of reporting in RCTs suggested that reporting was improving over time (5).

As the values chosen were estimates, additional sample size calculations were performed by varying the basic assumptions. The first alternative was to reduce the expected proportion from 75% to 66% (resulting in  $n=148$ ) or 50% (resulting in  $n=165$ ). Increasing the level of confidence from 0.8 to 0.9, with an expected proportion of 75%, would require an  $n$  of 203. After reviewing these estimates, the target sample size was set at

1  
2  
3 approximately n=175 clinical trials. Sample size calculations were performed with the web-  
4  
5 based application Statulator (RRID:SCR\_021003; 6).  
6

7 We searched for clinical trials published in August 2020; then went backward in time  
8  
9 adding additional months until the target sample size was reached. The final search  
10  
11 dates included clinical trials published between January and August 2020.  
12  
13

## 14 15 **Sample selection and screening process**

16  
17 Journals were selected on basis of the Scimago journal ranking list from 2019 in the  
18  
19 subject category orthopedics and sports medicine as determined by 2019 by Scimago  
20  
21 Journal Rank indicator (7). The Scimago journal-ranking list was sorted by the Scientific  
22  
23 Journal Ranking. The top 25% of journals (n=65) were then entered into the PubMed  
24  
25 search with filters for article type (clinical trial) and publication date (2019/12:2020/08).  
26  
27 The search was run on September 16, 2020.  
28  
29  
30  
31

32  
33 The search string was:

34  
35  
36 (((((((((((((((((((((((((((((((((((((((((((((((((((((((((((((((((((((((((((((((("British journal of sports medicine"[Journal])  
37 OR ("Sports Med"[jour])) OR ("The American journal of sports medicine"[Journal])) OR ("The  
38 bone & joint journal"[Journal])) OR ("The Journal of arthroplasty"[Journal])) OR ("The Journal of  
39 bone and joint surgery. American volume"[Journal])) OR ("Arthroscopy : the journal of  
40 arthroscopic & related surgery : official publication of the Arthroscopy Association of North  
41 America and the International Arthroscopy Association"[Journal])) OR ("Journal of bone and  
42 mineral research : the official journal of the American Society for Bone and Mineral  
43 Research"[Journal])) OR ("J Cachexia Sarcopenia Muscle"[jour])) OR ("Journal of shoulder and  
44 elbow surgery"[Journal])) OR ("Medicine and science in sports and exercise"[Journal])) OR  
45 ("Osteoarthritis and cartilage"[Journal])) OR ("International journal of sports physiology and  
46  
47  
48  
49  
50  
51  
52  
53  
54  
55  
56  
57  
58  
59  
60

1  
2  
3 performance"[Journal])) OR ("Knee surgery, sports traumatology, arthroscopy : official journal  
4 of the ESSKA"[Journal])) OR ("Skeletal muscle"[Journal])) OR ("Exercise and sport sciences  
5 reviews"[Journal])) OR ("Acta orthopaedica"[Journal])) OR ("Spine"[Journal])) OR  
6 ("International orthopaedics"[Journal])) OR ("Clinical orthopaedics and related  
7 research"[Journal])) OR ("Foot & ankle international"[Journal])) OR ("Therapeutic advances in  
8 musculoskeletal disease"[Journal])) OR ("Journal of science and medicine in sport"[Journal]))  
9 OR ("Orthopaedic journal of sports medicine"[Journal])) OR ("European spine journal : official  
10 publication of the European Spine Society, the European Spinal Deformity Society, and the  
11 European Section of the Cervical Spine Research Society"[Journal])) OR ("Scandinavian  
12 journal of medicine & science in sports"[Journal])) OR ("Bone & joint research"[Journal])) OR  
13 ("Current reviews in musculoskeletal medicine"[Journal])) OR ("Global spine journal"[Journal]))  
14 OR ("The Journal of the American Academy of Orthopaedic Surgeons"[Journal])) OR ("The  
15 Journal of hand surgery"[Journal])) OR ("Journal of teaching in physical education :  
16 JTPE"[Journal])) OR ("International journal of sport nutrition and exercise  
17 metabolism"[Journal])) OR ("Journal of strength and conditioning research"[Journal])) OR  
18 ("Journal of sports sciences"[Journal])) OR ("Journal of pediatric orthopedics"[Journal])) OR  
19 ("Annals of physical and rehabilitation medicine"[Journal])) OR ("Sports health"[Journal])) OR  
20 ("Archives of orthopaedic and trauma surgery"[Journal])) OR ("Journal of sport and health  
21 science"[Journal]) ) OR ("European journal of applied physiology"[Journal])) OR ("European  
22 journal of sport science"[Journal])) OR ("The spine journal : official journal of the North American  
23 Spine Society"[Journal])) OR ("International journal of sports medicine"[Journal])) OR ("The  
24 Knee"[Journal])) OR ("The Orthopedic clinics of North America"[Journal])) OR ("Physical  
25 education and sport pedagogy"[Journal])) OR ("Journal of athletic training"[Journal])) OR  
26 ("Calcified tissue international"[Journal]) ) OR ("Sport, education and society"[Journal])) OR  
27 ("Journal of orthopaedics and traumatology : official journal of the Italian Society of  
28 Orthopaedics and Traumatology"[Journal])) OR ("Journal of orthopaedic trauma"[Journal])) OR  
29  
30  
31  
32  
33  
34  
35  
36  
37  
38  
39  
40  
41  
42  
43  
44  
45  
46  
47  
48  
49  
50  
51  
52  
53  
54  
55  
56  
57  
58  
59  
60

("Journal of orthopaedic research : official publication of the Orthopaedic Research Society"[Journal]) OR ("Journal of biomechanics"[Journal]) OR ("Clinical journal of sport medicine : official journal of the Canadian Academy of Sport Medicine"[Journal]) OR ("EFORT open reviews"[Journal] ) OR ("Orthopaedics & traumatology, surgery & research : OTSR"[Journal]) OR ("Sports medicine - open"[Journal]) OR ("Clinics in sports medicine"[Journal]) OR ("European physical education review"[Journal]) OR ("The journal of knee surgery"[Journal]) OR ("Injury"[Journal]) OR ("Gait & posture"[Journal]) OR ("Research in sports medicine (Print)"[Journal]) AND ((clinicaltrial[Filter]) AND (2019/12:2020/08[pdat]))

## Data Abstraction

All reviewers completed training on a minimum of 10 articles to ensure that responses were consistent before starting data abstraction. Data from all included studies were extracted using preformatted Excel spreadsheets.

## Results

The search retrieved 175 articles from 27 journals Table S1. All articles were then uploaded into Rayyan (RRID:SCR\_017584; 8) for title and abstract screening. Two reviewers (RS, GL) performed title and abstract screening to exclude articles that were obviously not clinical trials, as defined by the ICMJE. The ICMJE defines a clinical trial as any research project that prospectively assigns people or a group of people to an intervention, with or without concurrent comparison or control groups, to study the relationship between a health-related intervention and a health outcome (9). After the title and abstract screening, two independent abstractors (RS, GL, RP) reviewed each full-length, original research article and any available supplemental files. All papers meeting

the ICMJE definition of a clinical trial were included. Disagreements were resolved by consensus.

Table S1 Identified top 25% journals that published clinical trials in the time period of interest, the number of identified published articles, and the number of included articles

| <b>Title</b>                                               | <b>Number of articles identified in search</b> | <b>Number of included articles</b> |
|------------------------------------------------------------|------------------------------------------------|------------------------------------|
| Medicine and Science in Sports and Exercise                | 22                                             | 21                                 |
| Journal of Strength and Conditioning Research              | 22                                             | 21                                 |
| Bone and Joint Journal                                     | 21                                             | 18                                 |
| Journal of Sports Sciences                                 | 13                                             | 12                                 |
| British Journal of Sports Medicine                         | 12                                             | 12                                 |
| Knee Surgery, Sports Traumatology, Arthroscopy             | 9                                              | 6                                  |
| Journal of Bone and Joint Surgery - Series A               | 8                                              | 5                                  |
| Acta Orthopaedica                                          | 8                                              | 8                                  |
| Scandinavian Journal of Medicine and Science in Sports     | 8                                              | 8                                  |
| American Journal of Sports Medicine                        | 7                                              | 7                                  |
| Journal of Shoulder and Elbow Surgery                      | 7                                              | 7                                  |
| Spine                                                      | 6                                              | 6                                  |
| Journal of Science and Medicine in Sport                   | 6                                              | 6                                  |
| International Journal of Sports Medicine                   | 6                                              | 6                                  |
| Sports Health                                              | 5                                              | 5                                  |
| International Journal of Sports Physiology and Performance | 4                                              | 4                                  |
| European Journal of Sport Science                          | 3                                              | 3                                  |
| Journal of Sport and Health Science                        | 2                                              | 2                                  |
| Clinical Orthopaedics and Related Research                 | 1                                              | 1                                  |
| Foot and Ankle International                               | 1                                              | 1                                  |
| Archives of Orthopaedic and Trauma Surgery                 | 1                                              | 1                                  |
| Spine Journal                                              | 1                                              | 1                                  |
| Knee                                                       | 1                                              | 1                                  |
| Journal of Athletic Training                               | 1                                              | 1                                  |
|                                                            | <b>175</b>                                     | <b>163</b>                         |

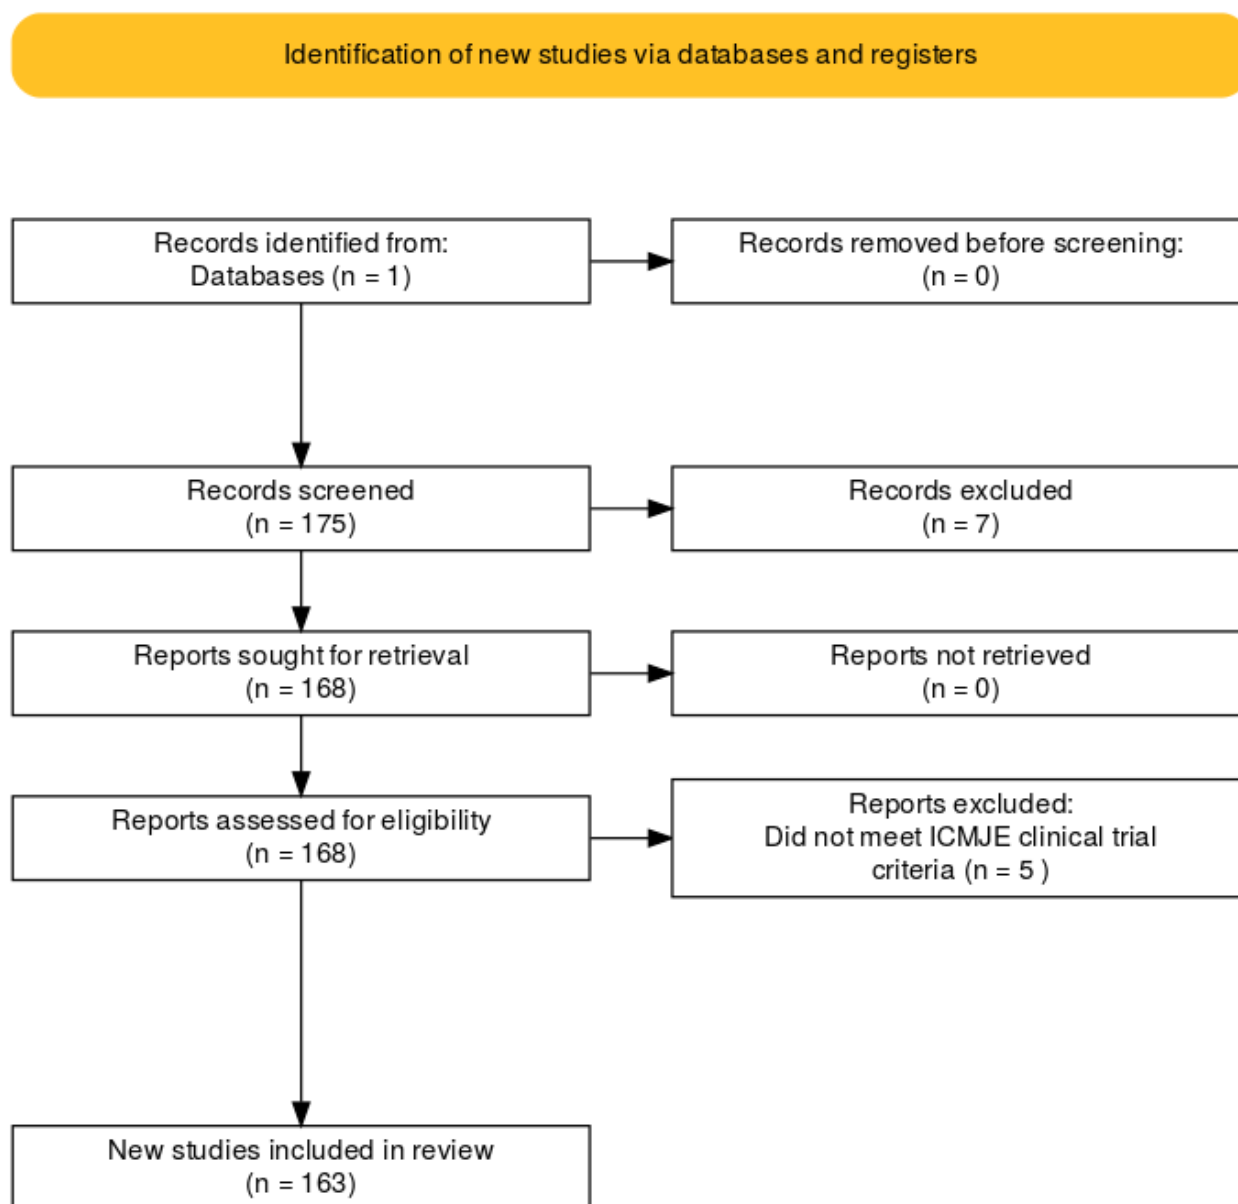

41 **Figure S1** Flow chart of the study selection process. Seven studies were excluded during the  
42 abstract screening because they did not meet the ICMJE clinical trial criteria (n=6) or were the  
43 wrong publication type (extended conference abstract; n=1). The flow diagram was created with  
44 the ShinyApp for PRISMA 2020 (RRID: 10,11).  
45  
46  
47  
48  
49  
50  
51  
52  
53  
54  
55  
56  
57  
58  
59  
60



## References

1. Daniel J, editor. *Sampling essentials: Practical guidelines for making sampling choices*. Los Angeles, Calif.: SAGE Publ; 2012. 291 p. eng.
2. Ghimire S, Kyung E, Kang W, Kim E. Assessment of adherence to the CONSORT statement for quality of reports on randomized controlled trial abstracts from four high-impact general medical journals. *Trials*. 2012;1377. doi:10.1186/1745-6215-13-77 Cited in: PubMed; PMID 22676267.
3. Turner L, Shamseer L, Altman DG, Schulz KF, Moher D. Does use of the CONSORT Statement impact the completeness of reporting of randomised controlled trials published in medical journals? A Cochrane review. *Syst Rev*. 2012;160. doi:10.1186/2046-4053-1-60 Cited in: PubMed; PMID 23194585.
4. Chess LE, Gagnier J. Risk of bias of randomized controlled trials published in orthopaedic journals. *BMC Med Res Methodol*. 2013;1376. doi:10.1186/1471-2288-13-76 Cited in: PubMed; PMID 23758875.
5. Dechartres A, Trinquart L, Atal I, Moher D, Dickersin K, Boutron I, Perrodeau E, Altman DG, Ravaut P. Evolution of poor reporting and inadequate methods over time in 20 920 randomised controlled trials included in Cochrane reviews: research on research study. *BMJ*. 2017;357j2490. doi:10.1136/bmj.j2490 Cited in: PubMed; PMID 28596181.
6. Khatkar M, Dhand N. *Statulator*; 2014.
7. SCImago (nd). SJR — SCImago Journal & Country Rank [Portal] [Internet]. 2020 [cited 2021 Feb 22]. Available from: <https://www.scimagojr.com/journalrank.php?category=2732>
8. Ouzzani M, Hammady H, Fedorowicz Z, Elmagarmid A. Rayyan-a web and mobile app for systematic reviews. *Syst Rev*. 2016;5(1):210. doi:10.1186/s13643-016-0384-4 Cited in: PubMed; PMID 27919275.
9. ICMJE. Recommendations for the Conduct, Reporting, Editing and Publication of Scholarly Work in Medical Journals [Internet]. 2020 [cited 2020 Aug 4]. Available from: <http://www.ICMJE.org>.
10. Haddaway NR, McGuinness L. PRISMA2020: R package and ShinyApp for producing PRISMA 2020 compliant flow diagrams: Zenodo; 2020.
11. Page MJ, McKenzie JE, Bossuyt PM, Boutron I, Hoffmann TC, Mulrow CD, Shamseer L, Tetzlaff JM, Akl EA, Brennan SE, Chou R, Glanville J, Grimshaw JM, Hróbjartsson A, Lalu MM, Li T, Loder EW, Mayo-Wilson E, McDonald S, McGuinness LA, Stewart LA, Thomas J, Tricco AC, Welch VA, Whiting P, Moher D. The PRISMA 2020 statement: an updated guideline for reporting systematic reviews. *BMJ*. 2021;372n71. doi:10.1136/bmj.n71 Cited in: PubMed; PMID 33782057.

# BMJ Open

## Reporting and transparent research practices in sports medicine and orthopedic clinical trials: A meta-research study

|                                 |                                                                                                                                                                                                                                                                                                                                                                                                                                                                                                                              |
|---------------------------------|------------------------------------------------------------------------------------------------------------------------------------------------------------------------------------------------------------------------------------------------------------------------------------------------------------------------------------------------------------------------------------------------------------------------------------------------------------------------------------------------------------------------------|
| Journal:                        | <i>BMJ Open</i>                                                                                                                                                                                                                                                                                                                                                                                                                                                                                                              |
| Manuscript ID                   | bmjopen-2021-059347.R1                                                                                                                                                                                                                                                                                                                                                                                                                                                                                                       |
| Article Type:                   | Original research                                                                                                                                                                                                                                                                                                                                                                                                                                                                                                            |
| Date Submitted by the Author:   | 16-Jun-2022                                                                                                                                                                                                                                                                                                                                                                                                                                                                                                                  |
| Complete List of Authors:       | Schulz, Robert; Berlin Institute of Health at Charité, BIH QUEST Center for Responsible Research; University of Potsdam, Department of Sport and Health Sciences<br>Langen, Georg; Institute for Applied Training Science<br>Prill, Robert; Brandenburg Medical School Theodor Fontane, Center of Orthopaedics and Traumatology<br>Cassel , Michael; University of Potsdam, Department of Sport and Health Sciences<br>Weissgerber, Tracey; Berlin Institute of Health at Charité, BIH QUEST Center for Responsible Research |
| <b>Primary Subject Heading</b>: | Research methods                                                                                                                                                                                                                                                                                                                                                                                                                                                                                                             |
| Secondary Subject Heading:      | Medical education and training, Medical publishing and peer review, Rehabilitation medicine, Research methods, Sports and exercise medicine                                                                                                                                                                                                                                                                                                                                                                                  |
| Keywords:                       | Clinical trials < THERAPEUTICS, STATISTICS & RESEARCH METHODS, SPORTS MEDICINE, REHABILITATION MEDICINE, ORTHOPAEDIC & TRAUMA SURGERY, MEDICAL EDUCATION & TRAINING                                                                                                                                                                                                                                                                                                                                                          |
|                                 |                                                                                                                                                                                                                                                                                                                                                                                                                                                                                                                              |

SCHOLARONE™  
Manuscripts

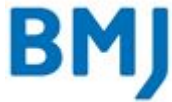

I, the Submitting Author has the right to grant and does grant on behalf of all authors of the Work (as defined in the below author licence), an exclusive licence and/or a non-exclusive licence for contributions from authors who are: i) UK Crown employees; ii) where BMJ has agreed a CC-BY licence shall apply, and/or iii) in accordance with the terms applicable for US Federal Government officers or employees acting as part of their official duties; on a worldwide, perpetual, irrevocable, royalty-free basis to BMJ Publishing Group Ltd ("BMJ") its licensees and where the relevant Journal is co-owned by BMJ to the co-owners of the Journal, to publish the Work in this journal and any other BMJ products and to exploit all rights, as set out in our [licence](#).

The Submitting Author accepts and understands that any supply made under these terms is made by BMJ to the Submitting Author unless you are acting as an employee on behalf of your employer or a postgraduate student of an affiliated institution which is paying any applicable article publishing charge ("APC") for Open Access articles. Where the Submitting Author wishes to make the Work available on an Open Access basis (and intends to pay the relevant APC), the terms of reuse of such Open Access shall be governed by a Creative Commons licence – details of these licences and which [Creative Commons](#) licence will apply to this Work are set out in our licence referred to above.

Other than as permitted in any relevant BMJ Author's Self Archiving Policies, I confirm this Work has not been accepted for publication elsewhere, is not being considered for publication elsewhere and does not duplicate material already published. I confirm all authors consent to publication of this Work and authorise the granting of this licence.

# Reporting and transparent research practices in sports medicine and orthopedic clinical trials: A meta-research study

Robert Schulz<sup>1,2</sup>, Georg Langen<sup>3</sup>, Robert Prill<sup>4</sup>, Michael Cassel<sup>2</sup>, Tracey Weissgerber<sup>1</sup>

<sup>1</sup> Berlin Institute of Health at Charité – Universitätsmedizin Berlin, QUEST Center for Responsible Research, Berlin, Germany

<sup>2</sup> University of Potsdam, Department of Sport and Health Sciences, Potsdam, Germany

<sup>3</sup> Institute for Applied Training Science, Leipzig, Germany

<sup>4</sup> Brandenburg Medical School Theodor Fontane, Department of Orthopedics and Traumatology, Brandenburg, Germany

## Corresponding author:

Tracey Weissgerber, PhD

Berlin Institute of Health at Charité - Universitätsmedizin Berlin

BIH QUEST Center for Responsible Research

Anna-Louisa-Karsch-Str. 2

10178 Berlin

[tracey.weissgerber@bih-charite.de](mailto:tracey.weissgerber@bih-charite.de)

**Word count:** 4459

## Abstract

**Objectives:** Transparent reporting of clinical trials is essential to assess the risk of bias and translate research findings into clinical practice. While existing studies have shown that deficiencies are common, detailed empirical and field-specific data is scarce. Therefore, this study aimed to examine current clinical trial reporting and transparent research practices in sports medicine and orthopedics.

**Setting:** Exploratory meta-research study on reporting quality and transparent research practices in orthopedics and sports medicine clinical trials.

**Participants:** The sample included clinical trials published in the top 25% of sports medicine and orthopedics journals over nine months.

**Primary and secondary outcome measures:** Two independent reviewers assessed pre-registration, open data, and criteria related to scientific rigor, like randomization, blinding, and sample size calculation, as well as the study sample, and data analysis.

**Results:** The sample included 163 clinical trials from 27 journals. While the majority of trials mentioned rigor criteria, essential details were often missing. Sixty percent (confidence interval [CI] 53-68%) of trials reported sample size calculations, but only 32% (CI 25-39%) justified the expected effect size. Few trials indicated the blinding status of all main stakeholders (4%; CI 1-7%). Only 18% (CI 12-24%) included information on randomization type, method, and concealed allocation. Most trials reported participants' sex/gender (95%; CI 92-98%) and information on inclusion and exclusion criteria (78%; CI 72-84%). Only 20% (CI 14-26%) of trials were pre-registered. No trials deposited data in open repositories.

**Conclusions:** These results will aid the sports medicine and orthopedics community in developing tailored interventions to improve reporting. While authors typically mention blinding, randomization and other factors, essential details are often missing. Greater acceptance of open science

1  
2  
3 practices, like pre-registration and open data, is needed. As these practices have been widely  
4 encouraged, we discuss systemic interventions that may improve clinical trial reporting.  
5  
6  
7

8 **Trial registration:** <https://doi.org/10.17605/OSF.IO/9648H>  
9  
10  
11  
12  
13  
14  
15  
16  
17  
18  
19  
20  
21  
22  
23  
24  
25  
26  
27  
28  
29  
30  
31  
32  
33  
34  
35  
36  
37  
38  
39  
40  
41  
42  
43  
44  
45  
46  
47  
48  
49  
50  
51  
52  
53  
54  
55  
56  
57  
58  
59  
60

## Strengths and limitations of this study

- The present study provides an in-depth assessment of clinical trial reporting quality, and utilization of transparent research practices in a recent sample of published clinical trials on orthopaedics and sports medicine.
- A comprehensive set of outcome parameters was assessed, covering fundamental aspects like scientific rigor, the study sample, and data analysis but also the utilization of pre-registration and open science practices.
- All assessments were performed by two independent reviewers and disagreements were resolved by consensus.
- The cross-sectional design and exploratory nature of the present study cannot provide information about cause-effect relationships. The odds ratios calculated in the present study were exploratory post-hoc calculations.
- The sample consisted of the top 25% of sports medicine and orthopedics journals, hence our findings may not be generalizable to journals that are not indexed by PubMed, lower tier journals, or non-English journals.

## Introduction

The overarching goal of medical research is to improve healthcare for patients, which requires the biomedical community to translate study outcomes into clinical practice (1). Clinical trials are central to this process, as properly conducted trials reduce the risk of bias and increase the likelihood that results about new treatments will be trustworthy, reproducible and generalizable (2,3). Clinical trials must be properly designed, conducted, and reported (4) to facilitate translation. Poorly designed and conducted trials may not be trustworthy or reproducible. This undermines public trust in biomedical research and raises concerns about whether the trial costs and patient risks were justified (5,6). Poor reporting makes it difficult to distinguish between trials with and without a high risk of bias.

To improve clinical trial reporting, the Consolidated Standards of Reporting Trials (CONSORT) guidelines (7,8) have been recommended by the ICMJE and widely disseminated by the EQUATOR network (9,10). While reporting has improved over time, major deficiencies that can impair translation are still common (11,12). Details needed to assess the risk of bias were missing from many published trials. More than half of all trials failed to address allocation concealment, and almost one third of studies did not address blinding of participants and personnel (12). Similarly, among randomized controlled trials published in the top five orthopedics journals, 60% failed to address the blinding status of the participants and 58% did not specify the number of participants included in the final analysis (13).

Orthopedics and sports medicine researchers have joined efforts to improve study design and reporting. Newly formed societies (14,15) and editorial series (16) focus on improving research quality in sports medicine and orthopedics. These efforts are urgently needed, as only 1% of studies in high-impact orthopedic journals reported all ten criteria needed for risk of bias assessment (13). In 42% of papers, risk of bias could not be assessed due to incomplete reporting (13). Incomplete reporting of exercise interventions (17) makes it impossible to implement interventions in clinical practice or to assess the appropriateness of the control intervention (18).



1  
2  
3 In sports medicine related fields, meta-researchers suggested that scientists may be using  
4 questionable research practices, such as those described in Table 1, after observing overinflated  
5 effect sizes (19) and an unreasonably high number of papers that support the study hypothesis  
6 (20). Comprehensive reporting may prevent biases like selective reporting, selection bias, attrition  
7 bias, outcome switching or wrong sample size bias, or make them easier to detect (see table 1 for  
8 selected definitions). However, earlier studies have shown that reporting deficiencies are still  
9 common in orthopedics (13) and general medical journals (12,21).

10  
11  
12 Therefore, this meta-research study examined reporting among clinical trials published in the top  
13 25% of sports medicine and orthopedics journals as determined by Scientific Journal Rank. Our  
14 objective was to assess the prevalence of reporting for selected criteria, including pre-registration,  
15 open data and reporting of randomization, blinding, sample size calculations, data analysis and  
16 the flow of participants through the study. Meta-research data on clinical trial design, conduct and  
17 reporting will help researchers in sports medicine to implement targeted measures to improve trial  
18 design and reporting.  
19  
20  
21  
22  
23  
24  
25  
26  
27  
28  
29  
30  
31  
32  
33  
34  
35  
36  
37  
38  
39  
40  
41  
42  
43  
44  
45  
46  
47  
48  
49  
50  
51  
52  
53  
54  
55  
56  
57  
58  
59  
60

**Table 1** Terminology and concepts. Created by the authors.

|                                                   |                                                                                                                                                                                                                                                                                                                                                                                                                                                                 |
|---------------------------------------------------|-----------------------------------------------------------------------------------------------------------------------------------------------------------------------------------------------------------------------------------------------------------------------------------------------------------------------------------------------------------------------------------------------------------------------------------------------------------------|
| <b>Concept</b>                                    |                                                                                                                                                                                                                                                                                                                                                                                                                                                                 |
| <b>Questionable research practices</b>            | Questionable research practices are defined as “Design, analytic, or reporting practices that have been questioned because of the potential for the practice to be employed with the purpose of presenting biased evidence in favor of an assertion” (22)                                                                                                                                                                                                       |
| <b>Selective reporting/ cherry picking</b>        | The decision about whether to publish a study or parts of a study is based on the direction or statistical significance of the results (23,24). Pre-registration and Registered Reports may prevent selective reporting (25,26), which is also known as cherry picking.                                                                                                                                                                                         |
| <b>Publication bias</b>                           | The decision about whether to publish research findings depends on the strength and direction of the findings (27). The odds of publication are nearly four times higher among clinical trials with positive findings, compared to trials with negative or null findings (28).                                                                                                                                                                                  |
| <b>Outcome reporting bias</b>                     | Only particular outcome variables are included in publications and decisions about which variables to include are based on the statistical significance or direction of the results (23). Outcomes that are statistically significant have higher odds of being fully reported than non-significant outcomes (29,30).                                                                                                                                           |
| <b>Attrition bias</b>                             | Attrition refers to reductions in the number of participants throughout the study due to withdrawals, dropouts, or protocol deviations. Attrition bias occurs when there are systematic differences between people who leave the study and those who continue (31).<br><br>For example, a trial shows no differences between two treatments. In one group, however, half the participants dropped out because they underwent surgery due to worsening symptoms. |
| <b>Null hypothesis statistical testing (NHST)</b> | NHST is originally based on theories of Fischer and Neyman-Pearson. The null hypothesis is rejected or accepted depending on the position of an observed value in a test distribution. While NHST is standard practice in many fields, the International Committee of Medical Journal Editors warns against the inappropriate use and sole reliance on NHST due to several shortcomings of using this approach inappropriately (32).                            |
| <b>p-Hacking</b>                                  | Describes the process of analyzing the data in multiple ways until statistically significant results are found.                                                                                                                                                                                                                                                                                                                                                 |
| <b>HARKing</b>                                    | HARKing, or hypothesizing after results are known, is defined as presenting a post hoc hypothesis as if it were an a priori hypothesis (33).                                                                                                                                                                                                                                                                                                                    |

## Methods

### Protocol Pre-registration

The study was pre-registered on the Open Science Framework (RRID:SCR\_003238) at <https://doi.org/10.17605/OSF.IO/9648H>. Additional details regarding sample selection and screening, data abstraction, a sample size calculation, and data for each included study can be found in the supplemental materials.

### Sample selection and screening

We systematically examined clinical trials published in the top 25% of orthopedics and sports medicine journals over nine months. This sampling strategy provides an overview of practices in the field, particularly among journals whose articles receive the most attention. The large number of journals included ensures that findings are not driven by practices or policies of individual journals. Journals in the orthopedics and sports medicine category were selected based on the Scimago Journal Rank indicator (34) (supplementary methods). The top 25% of journals (n=65) were entered into the PubMed search with article type (clinical trial) and publication date (2019/12:2020/08) filters. The search was run on September 16, 2020. All articles (n=175 from 27 journals) were uploaded into Rayyan (RRID:SCR\_017584; 35) to screen titles and abstracts.

### Inclusion and exclusion criteria

Two reviewers (RS, GL) screened titles and abstracts to exclude articles that were obviously not clinical trials, as defined by the ICMJE. The ICMJE defines a clinical trial as any research project that “prospectively assigns people or a group of people to an intervention, with or without concurrent comparison or control groups, to study the relationship between a health-related intervention and a health outcome”(9). Two independent reviewers (RS, GL, RP) then performed full-text screening. All papers meeting the ICMJE clinical trial definition were included, whereas articles that did not meet the definition were excluded. Studies looking at both health-related and

1  
2  
3 non-health-related outcomes were included but data abstraction focused on health-related  
4  
5 outcomes only. Disagreements were resolved by consensus.  
6  
7

## 8 **Data abstraction**

9  
10 Two independent assessors (RS, GL, RP) reviewed each article and its supplemental files to  
11  
12 evaluate the reporting of pre-specified criteria and extracted data using preformatted Excel  
13  
14 spreadsheets. Table 2 presents the main criteria that were abstracted and a reason for their  
15  
16 selection. The transparency and rigor criteria are based on CONSORT criteria for methods and  
17  
18 results reporting (7,8). We also abstracted additional open science criteria, focusing on the open  
19  
20 access status of the trial publication, whether a data availability statement was included and  
21  
22 whether data were deposited in a public repository (36,37). The abstraction protocol was deposited  
23  
24 on the Open Science Framework (RRID:SCR\_003238) at <https://osf.io/q8b46/>.  
25  
26  
27

## 28 **Protocol Deviations**

29  
30 For trials with exercise interventions, we assessed the frequency, intensity, and volume of exercise  
31  
32 for experimental and control interventions. The protocol was modified if the control intervention  
33  
34 did not involve exercise. Control interventions were rated as fully reported if the frequency, the  
35  
36 content, and the duration was described. Control groups that received no intervention (e.g. wait-  
37  
38 and-see) were rated as fully reported if the activity status or number of other treatments were  
39  
40 monitored.  
41  
42

43  
44 Trial registration statement assessments were amended to determine whether trials were  
45  
46 registered prospectively or retrospectively. Two abstractors (RS, MP) assessed each trial  
47  
48 registration. Trials were considered pre-registered if their registration was completed before  
49  
50 the first participant was enrolled. Otherwise, the trial was classified as retrospectively registered. If  
51  
52 the primary outcome was changed after the study began, the trial was classified as retrospectively  
53  
54 registered.  
55  
56

## 57 **Statistical Analysis**

1  
2  
3 This exploratory study assessed the prevalence of reporting for selected criteria in sports medicine  
4 and orthopedics clinical trials. Results are presented as the percentage of trials reporting each  
5 outcome measure, with a 95% confidence interval.  
6  
7

8  
9 Odds ratios and their 95% confidence intervals were calculated to examine the relationship  
10 between the completeness of reporting and pre-registration, the use of flow charts, or the presence  
11 of sample size calculations and the completeness of reporting. Odds ratios were interpreted as  
12 unclear if the confidence interval included 1. These analyses were not pre-registered.  
13  
14  
15  
16  
17

### 18 **Sample Size Calculation**

19  
20 This exploratory study does not require formal sample size calculations. However, we adhered to  
21 conventional sample size recommendations for exploratory designs and performed a precision-  
22 based sample size calculation to obtain rough estimates of relevant sample sizes (supplemental  
23 methods). Depending on different assumptions, a required sample size of 124 to 203 trials was  
24 estimated.  
25  
26  
27  
28  
29  
30  
31

### 32 **Patient and public involvement**

33  
34 Patients or the public were not involved in the design, or conduct, or reporting, or dissemination  
35 plans of our research.  
36  
37  
38  
39  
40  
41  
42  
43  
44  
45  
46  
47  
48  
49  
50  
51  
52  
53  
54  
55  
56  
57  
58  
59  
60

**Table 2** Criteria for reporting and transparent research practices. The table shows specific questions used to assess each outcome criteria and provides a brief justification for why each criteria was selected. Created by the authors.

| Category                                        | Assessment                                                                                                                                                                                                                                                                                                                                                                                              | Rationale and Context                                                                                                                                                                                                                                                                                                                                                                                                                                                                                                                                                                                                           |
|-------------------------------------------------|---------------------------------------------------------------------------------------------------------------------------------------------------------------------------------------------------------------------------------------------------------------------------------------------------------------------------------------------------------------------------------------------------------|---------------------------------------------------------------------------------------------------------------------------------------------------------------------------------------------------------------------------------------------------------------------------------------------------------------------------------------------------------------------------------------------------------------------------------------------------------------------------------------------------------------------------------------------------------------------------------------------------------------------------------|
| <b>Sample Size calculation</b>                  | <p>Was an a priori sample size calculation performed?</p> <p>What type of sample size calculation was performed?</p> <p>Did the authors provide a justification for the expected effect size?</p>                                                                                                                                                                                                       | <ul style="list-style-type: none"> <li>- Low power is associated with high rates of spurious findings and overinflated effect sizes (38), and there is evidence for low median statistical power in rehabilitation research [40].</li> <li>- A priori sample size calculations help to prevent underpowered trials, however, they are regularly performed inadequately. Common problems include failing to justify the expected treatment effect and not stating all values required for calculation (39). The majority of sample size calculations in rehabilitation trials are missing expected effect sizes (40).</li> </ul> |
| <b>Randomization &amp; concealed allocation</b> | <p>Did the authors address whether randomization was used?</p> <p>If so, were the randomization type and method mentioned?</p> <p>Were the following details of the allocation concealment procedure addressed?</p> <ul style="list-style-type: none"> <li>- Who generated the randomization sequence?</li> <li>- Who enrolled participants?</li> <li>- Who assigned participants to groups?</li> </ul> | <ul style="list-style-type: none"> <li>- Inadequate randomization and allocation concealment procedures introduce selection bias and are associated with increased odds of significant but spurious results (41) and overestimated treatment effects (42).</li> </ul>                                                                                                                                                                                                                                                                                                                                                           |
| <b>Blinding</b>                                 | <p>Did the article include a statement on blinding?</p> <p>Was the blinding status of each of the major stakeholders mentioned (participants, healthcare providers, outcome assessors, data analysts)?</p> <p>Was each stakeholder group blinded?</p>                                                                                                                                                   | <ul style="list-style-type: none"> <li>- Blinding prevents ascertainment bias in clinical trials. A lack of blinding is associated with overinflated effect sizes (43). Terms like double-blind are ambiguous, interpreted differently, and don't provide reliable information on blinding of specific stakeholder groups (44). These terms should be abandoned in favor of reporting the blinding status of all relevant stakeholders (8).</li> </ul>                                                                                                                                                                          |
| <b>Flow of participants</b>                     | <p>Were the inclusion and exclusion criteria clearly stated?</p> <p>Did the authors define how many participants were excluded at each phase of the study and list reasons for exclusion?</p> <p>Did the authors present this information in a flow chart?</p>                                                                                                                                          | <ul style="list-style-type: none"> <li>- Detailed inclusion and exclusion criteria help the reader to assess generalizability.</li> <li>- Knowing when and why participants dropped out or were removed from the study is essential to estimate attrition bias.</li> </ul>                                                                                                                                                                                                                                                                                                                                                      |
| <b>Data analysis</b>                            | <p>Was a study hypothesis presented and a primary outcome specified?</p> <p>Was the hypothesis supported or rejected?</p>                                                                                                                                                                                                                                                                               | <ul style="list-style-type: none"> <li>- Specifying the study hypothesis and the primary outcome prospectively safeguards against selective reporting. Discrepancies between the registration</li> </ul>                                                                                                                                                                                                                                                                                                                                                                                                                        |

|                                                                                        |                                                                                                                                                                                                                                                                                                                                                                                               |                                                                                                                                                                                                                                                                                                                                                                                                                                                                                                                                                                                                                                                                                                                                                                                                                                  |
|----------------------------------------------------------------------------------------|-----------------------------------------------------------------------------------------------------------------------------------------------------------------------------------------------------------------------------------------------------------------------------------------------------------------------------------------------------------------------------------------------|----------------------------------------------------------------------------------------------------------------------------------------------------------------------------------------------------------------------------------------------------------------------------------------------------------------------------------------------------------------------------------------------------------------------------------------------------------------------------------------------------------------------------------------------------------------------------------------------------------------------------------------------------------------------------------------------------------------------------------------------------------------------------------------------------------------------------------|
| <p>1<br/>2<br/>3<br/>4<br/>5<br/>6<br/>7<br/>8<br/>9<br/>10<br/>11<br/>12<br/>13</p>   | <p>If NHST was performed, were exact p-values, degrees of freedom, and the test statistics presented?<br/>Were standardized effect sizes and their precision reported?</p>                                                                                                                                                                                                                    | <p>and the study report may indicate outcome switching, which favors statistically significant results and introduces selective reporting bias (45,46).</p> <ul style="list-style-type: none"> <li>- Reporting the test statistic and degrees of freedom allows readers to identify misreported p-values. In 13% of psychology studies, meta-researchers detected mismatches between p-values and the reported test statistic and degrees of freedom that would affect statistical conclusions (47).</li> <li>- Analyses should take the magnitude, confidence, and likelihood of an effect into account, instead of focusing on whether effects are statistically significant. Effect sizes show the magnitude of effects within a study, while standardized effect sizes allow for comparisons across studies (48).</li> </ul> |
| <p>14<br/>15<br/>16<br/>17</p>                                                         | <p><b>Data visualization</b><br/>Were bar graphs used to visualize continuous data?</p>                                                                                                                                                                                                                                                                                                       | <ul style="list-style-type: none"> <li>- Using bar graphs to visualize continuous data is problematic because many different data distributions can lead to the same bar graph. The actual data may suggest different conclusions from the summary statistics alone (49,50).</li> </ul>                                                                                                                                                                                                                                                                                                                                                                                                                                                                                                                                          |
| <p>18<br/>19<br/>20<br/>21<br/>22<br/>23<br/>24<br/>25<br/>26<br/>27<br/>28<br/>29</p> | <p><b>Intervention reporting</b><br/>What type of intervention was performed (e.g. exercise, physical therapy, surgery)?<br/>For exercise interventions:<br/>- Was monitoring of adherence to the intervention addressed?<br/>- Were essential details needed to replicate the experimental and control interventions (e.g. frequency, intensity, volume, and type of exercise) provided?</p> | <ul style="list-style-type: none"> <li>- When clinical trials do not report details needed to implement the intervention, findings cannot be translated into clinical practice. The minority of exercise studies provided enough information to allow others to replicate interventions (51). The high prevalence of insufficient reporting led to the establishment of new intervention reporting guidelines (52,53).</li> <li>- Adherence can effect intervention efficacy. Intervention effects can be up to three times larger in fully adherent participants compared to partly adherent participants (54).</li> </ul>                                                                                                                                                                                                      |
| <p>30<br/>31<br/>32<br/>33<br/>34<br/>35<br/>36<br/>37<br/>38<br/>39</p>               | <p><b>Transparency criteria</b><br/>Was the study registered or pre-registered?<br/>Was a data availability statement included? Were the data publically available?<br/>Was the study openly accessible?</p>                                                                                                                                                                                  | <ul style="list-style-type: none"> <li>- Half of researchers admit to selectively reporting results and presenting post hoc analyses as if they had been pre-specified (22). Pre-registration protects against this. Pre-registration (since 2005) and data availability statements (since 2018) are mandatory for clinical trials (55).</li> <li>- Open access papers generate more media coverage and citations (56).</li> <li>- Open data facilitates collaboration and benefits society (56). In 2017, 21% of 316 biomedical journals (57) and 28% of funders (58) required open data.</li> </ul>                                                                                                                                                                                                                            |

## Results

175 articles were screened, and 168 articles were reviewed from 27 sports medicine and orthopedics journals (Figure S1, Table S1). Eleven articles were excluded because they did not meet the ICMJE clinical trial criteria. One extended conference abstract was excluded because it was not a full-length research article. Analyses included the remaining 163 papers.

For peer review only



## Rigor and Sample Criteria

**Figure 1** Reporting prevalence for rigor and sample criteria. This plot displays the percentage of trials that addressed each criteria. For information on the actual randomization or blinding status, please refer to the text. The different colored data points are for better visual differentiation of each subcategory. Created by the authors.

**Sample size calculations:** The reporting prevalence of sample size calculations and related results can be found in Figure 1. In trials not reporting a priori sample size calculation (Figure 1), 2% (CI 0-5%; n=4) reported that no sample size calculation was performed because the study was an exploratory pilot study. Among trials reporting sample size calculations (n=98), 53% (CI 43-63%; n=52) included a justification for the expected effect size. The remaining trials either presented no justification (39%; CI 23-42; n=32) or used arbitrary effect size thresholds (14%; CI 7-21%; n=14). Almost all sample size calculations were based on statistical power (93%; CI 88-98%; n=96). Two sample size calculations were based on precision (2%; CI 0-5%). No calculations were based on Bayes methods.

**Randomization and allocation concealment:** The reporting prevalence of randomization, allocation concealment and related results can be found in Figure 1. In trials not addressing randomization (Figure 1), two trials (1%; CI 0-3%) were not randomized, and five trials did not mention randomization (3%; CI 0-6%).

Eight percent (CI 4-12%; n=13) of trials provided complete information on the allocation concealment procedure (defined as reporting who generated the randomization sequence, and who enrolled participants and assigned them to interventions). Some of this information was available 23% (CI 16-29%; n=37) of trials, and 69% (CI 62-76%; n=113) did not report any information. Few studies reported at least some information on all three factors needed to assess randomization and allocation concealment (randomization type, method, and allocation concealment; 18%; CI 12-24%; n=30).

**Blinding:** The reporting prevalence of statements on blinding of different stakeholders can be found in Figure 1. The actual blinding status of included trials is visualized in Figure 2. Two-thirds

1  
2  
3 of trials addressed blinding (Figure 2). Among trials that addressed blinding (Figure 1), 81% (CI  
4 73-88%; n=84) used blinding, while 19% (CI 12-27%; n=20) were not blinded. Only 4% (CI 1-7%;  
5 n=7) of all trials addressed the blinding status of all four stakeholder groups (Figure 2). Trials were  
6 most likely to address the blinding status of the outcome assessors and the participants. The  
7 blinding status of data analysts is typically unreported.  
8  
9  
10  
11  
12

13  
14  
15 **Figure 2** The blinding status across the main different stakeholder groups across all clinical trials  
16 (n=163). Created by the authors.  
17  
18  
19  
20  
21  
22  
23  
24  
25  
26  
27  
28  
29  
30  
31  
32  
33  
34  
35  
36  
37  
38  
39  
40  
41  
42  
43  
44  
45  
46  
47  
48  
49  
50  
51  
52  
53  
54  
55  
56  
57  
58  
59  
60

## Sample-related Criteria

The reporting prevalence of criteria related to the study sample can be found in Figure 1. Approximately three-quarters of trials reported the inclusion and exclusion criteria and provided complete information on the number of participants at enrollment, after enrollment, and included in data analysis (Figure 1). Fewer trials used a flow chart to illustrate the number of included and excluded participants at each stage. Among trials that did not report the reasons for all exclusions after enrollment (Figure 1), 17% (CI 11-22%; n=24/90) reported the reasons for some exclusions and 33% (CI 26-41%; n=41/90) did not report any information.

In trials that stated participants' sex or gender (Figure 1), a median of 51% (interquartile range (IQR) 27-71%) of participants were women in the group with the highest proportion of women, vs. 49% (IQR 22-66%) in the group with the lowest proportion of women.

## Intervention Criteria

The most frequent intervention type was exercise (44%; CI 37-52%; n=72), followed by surgery (26%; CI 19-32%; n=42). Diet (6%; CI 2-9%; n=9), physical therapy (5%; CI 2-8%; n=8), pharmacological interventions (4%; CI 0-2%; n=7) and manual therapy (1%; CI 0-2%; n=1) were uncommon. Fifteen percent (CI 9-20% n=24) of studies used other interventions.

We next examined reporting of details needed to assess or implement exercise interventions. Sixty-two percent (CI 50-73%; n=42) of trials with exercise interventions monitored adherence or compliance, one trial (1%; CI 0-4%) reported that adherence was not monitored, and 37% (CI 25-48%; n=25) of trials did not mention intervention adherence or compliance. All trials reported at least some information about the experimental exercise intervention, and most trials provided complete information (Table 2) (83%; CI 75-92%; n=60). Fewer trials reported complete information for the control interventions (63%; CI 51-74%; n=45). Five trials did not provide any information about the control intervention (7%; CI 1-13%).

## Data analysis and Transparency Criteria

**Figure 3** Reporting prevalence for data analysis and transparency criteria. This plot displays the percentage of trials that addressed each criteria. Abbreviations: NHST, null hypothesis statistical testing; ES, effect size. Created by the authors.

**Hypotheses and outcome measures:** The reporting prevalence of the study hypotheses and outcome measures can be found in Figure 3. Nearly half of the articles specified a primary outcome and almost two-thirds of articles presented a hypothesis (Figure 3). Among clinical trials that reported a hypothesis (Figure 3), 61% (CI 53-68%; n=62) supported the main hypothesis, while 39% of trials (CI 32-47; n=40) did not support the main hypothesis.

**Statistical Reporting:** Figure 3 shows the reporting prevalence of criteria related to statistical reporting and data visualization. Almost all studies used NHST (Figure 3). While most trials reported exact p-values, few reported test statistics and degrees of freedom. Approximately half of the trials reported standardized effect sizes but only 21% included the precision of the effect size estimates. One study reported Bayesian statistics (1%; CI 0-2%).

**Data visualization:** Bar graphs were used to display continuous data in 21% (CI 15-21%; n=34) of trials. These graphs should be replaced with more informative graphics (e.g. dot plots, box plots or violin plots) that show the data distribution (49,50).

### Transparency

The reporting prevalence of transparency criteria are shown in Figure 3. Most of the studies with registration statements (Figure 3) were registered in ClinicalTrials.gov (n=52), followed by the Australian New Zealand Clinical Trials Registry (n=9), International Standard Randomized Controlled Trial Number Register (n=4), and other regional clinical trials registries (n=9). Less than half of the registered trials, and 20% of all trials, were pre-registered. The remaining trials with registration statements were registered retrospectively (58%; CI 48-69%; n=49/84). This included six prospectively registered trials where the primary outcome was changed after data collection

1  
2  
3 started. Two studies with registration statements did not provide sufficient information to determine  
4 whether the study was registered prospectively or retrospectively (2%; CI 0-6%; n=2/84).  
5  
6

7  
8 Data availability statements were uncommon (Figure 3). No trial with a data availability statement  
9 deposited data publically in an open repository. Twenty-one percent of trials with data availability  
10 statements (15-27%; n=4) noted that data were not publicly available, whereas 74% (67-80%;  
11 n=15) stated that data were available upon request. One study (5%; CI 2-9%) reported that all  
12 data were available in the main text and its supplements, however, raw data was not available in  
13 either location.  
14  
15  
16  
17  
18  
19  
20  
21  
22  
23  
24  
25  
26  
27  
28  
29  
30  
31  
32  
33  
34  
35  
36  
37  
38  
39  
40  
41  
42  
43  
44  
45  
46  
47  
48  
49  
50  
51  
52  
53  
54  
55  
56  
57  
58  
59  
60

## Exploratory analyses

**Pre-registration and reporting:** Compared to unregistered or retrospectively registered studies, pre-registered studies were more likely to report complete information for randomization (type and method) and allocation concealment (OR 4.3; CI 1.9-10.0), whether all stakeholders were blinded (OR 8.6; CI 1.6-46.5), a priori sample size calculations (OR 2.5; CI 1.1-5.8), justifications for expected effect sizes used in power calculations (OR 2.5; CI 1.1-5.8), and specifying the primary outcome measure (OR 3.3; CI 1.5-7.1). The odds of reporting (OR 1.0; CI 0.48-2.1) or rejecting (OR 1.0; CI 0.42-2.6) the study hypothesis were not clearly different between unregistered and pre-registered studies.

**Sample size calculations and reporting:** The odds of rejecting the main hypothesis in trials with a priori sample calculations were unclear (OR 1.3; CI 0.6-2.8). Trials that provided justifications for the expected effect size were more likely to reject the study hypothesis (OR 2.5; CI 1.2-5.2).

**Flow charts and reporting:** The odds of reporting all reasons for dropouts (OR 4.6; CI 2.3-9.3) and explicitly reporting the number of participants in each group that were included in the data analysis (OR 163.3; CI 21.4-1248.5) were higher among studies that used flow charts to track participant flow, compared to those that did not.

## Discussion

Sports medicine and orthopedics researchers have recently emphasized rigorous study design and reporting to make research easier to understand, interpret, and translate into clinical practice (16). Calls for more transparent reporting in orthopedics and sports medicine (19,26,59) followed older studies suggesting that poor clinical trial reporting limits readers ability to assess study quality and risk of bias (13,60,61). Our study shows that while most studies include a general statement about rigor criteria, like blinding or randomization, these statements lack essential details needed to assess the risk of bias. The majority of trials report criteria related to the study sample, such as the sex of participants, inclusion and exclusion criteria, or the number of participants finally included in the analysis. Only 20% of studies were pre-registered. No study shared data in open repositories.

### Opportunities to improve reporting

These results highlight two main opportunities to improve transparency and reproducibility in sports medicine and orthopedics clinical trials; improving reporting for essential details of the main CONSORT elements and increasing uptake of open science practices.

First, our results indicate that most authors are aware that they need to address factors like blinding, randomization and sample size calculations; however, few provide the essential details required to evaluate the trial and interpret the results. Almost all trials addressed blinding, for example, but only 4% reported the blinding status of all main stakeholders. Educational efforts should emphasize the difference between informative and uninformative reporting (see example

Figure 4 A priori sample size calculations are essential for generating meaningful results with clinical trials. Created by the authors. This infographic focusses on key elements a priori sample size calculations that should be reported in clinical trial publication. However, it is important to note that each element should be justified individually including the thresholds for type 1 and type 2 errors, and the expected effect size. Daniel Lakens free article on sample size justification provides an excellent overview of aspects to consider when planning empirical research studies (62).

1  
2  
3 in Figure 4). CONSORT writing templates may also help (60). Target criteria should include the  
4 blinding status of all main stakeholders, randomization type and method, how and by whom  
5 concealed allocation was performed, and effect size justifications in sample size calculations.  
6  
7

8  
9  
10 Second, interventions are needed to increase pre-registration and data sharing. Although the  
11 ICJME has required clinical trial pre-registration since 2005 (61), only one-fifth of trials were pre-  
12 registered. Pre-registered studies had higher odds of reporting several rigor criteria, potentially  
13 suggesting that authors who preregister may be more aware of reporting guidelines. Our results  
14 are consistent with previous findings (63) that trial registrations were among the least reported  
15 CONSORT items in sports medicine. A recent study in kinesiology shows even lower rates of pre-  
16 registration, data-availability statements, and data sharing in open repositories (64). Sports  
17 medicine researchers have already noted that pre-registration and registered reports can prevent  
18 questionable research practices (26) (Table 1) or make them easier to detect (65).  
19  
20  
21  
22  
23  
24  
25  
26  
27  
28  
29

30 Data were not shared in public repositories, suggesting that this topic requires special attention.  
31 The benefits of data sharing for authors include more citations (66,67), likely increased  
32 trustworthiness (68), and increased opportunities to collaborate with researchers who want to  
33 perform secondary analyses (69). Recent materials have addressed many common concerns  
34 about sharing patient data, including data privacy and confidentiality (70–72). Regulations vary  
35 by country and institution. Some institutions have designated support staff for data sharing.  
36 Researchers should contact their institutions' data privacy, statistics, or ethics offices to identify  
37 local experts. Seventy-four percent of trials with data availability statements noted that data were  
38 available on request. This is problematic, as such data are often unavailable and the odds of  
39 obtaining data decline precipitously with time since publication (73).  
40  
41  
42  
43  
44  
45  
46  
47  
48  
49  
50

51 Interestingly, our exploratory analysis revealed that the odds of rejecting the study hypothesis  
52 were 2.5 (CI 1.2-5.2) times higher in trials that provided a justification for the expected effect size  
53 in sample size calculations. This might indicate overinflated effect sizes, as trials that based their  
54  
55  
56  
57  
58  
59  
60



1  
2  
3 sample size calculation on effect sizes published in earlier studies more often failed to find a similar  
4 sized effect. Inflated effect sizes were also observed in the psychological science reproducibility  
5 project, where replicated effects were generally smaller than those in the initial studies (74).  
6  
7

8  
9 Authors should also be encouraged to report the data analysis transparently. Our study shows  
10 that more than one-fifth of the included trials used bar graphs to visualize continuous data. While  
11 this practice is common in many fields (75), these figures are problematic because many different  
12 data distributions can lead to the same summary statistics shown in bar graphs. Researchers  
13 should use data visualisations that show the data distribution, such as dot plots, box plots, or violin  
14 plots (49,50). Reporting of test statistics and degrees of freedom yields much potential for  
15 improvement, as well as reporting of standardized effect sizes and their precision. Instead of  
16 making decisions based on p-values alone, reporting the size and precision of effects in  
17 combination with the p-value provides a more complete representation of the results and reduces  
18 the likelihood of spurious findings. Twenty-five to 38% of medical articles (76), and up to 50% in  
19 psychology papers (47), contain p-values that don't match the reported test-statistic and degrees  
20 of freedom. These inaccurate p-values may alter study conclusions in 13% of psychology papers  
21 (47). Our study shows that these assessments are impossible in sports medicine and orthopedics  
22 clinical trials, as test statistics and degrees of freedom are rarely reported.  
23  
24  
25  
26  
27  
28  
29  
30  
31  
32  
33  
34  
35  
36  
37  
38

39 Reporting of criteria related to the study sample and to exercise interventions highlighted some  
40 positive points. Whereas Costello et al. (77) observed that less than 40% of sports and exercise  
41 study participants were females, indicating sex bias, our study, on average, shows an even  
42 distribution of sex/gender. Similarly the number of participants included in the analysis was  
43 reported in 75% of trials in the present study, compared to 42% of randomized controlled trials in  
44 orthopedic journals (13). The introduction of flow charts to display the participant flow in  
45 CONSORT 2010 may improve reporting for sample related criteria, as trials which included flow  
46 charts were more likely to report the number of participants included in the analysis and reasons  
47 for all exclusions. While the majority of studies reported key details of exercise interventions,  
48  
49  
50  
51  
52  
53  
54  
55  
56  
57  
58  
59

1  
2  
3 reporting was less comprehensive for the control intervention and for intervention adherence or  
4  
5 compliance.  
6  
7  
8  
9  
10  
11  
12  
13  
14  
15  
16  
17  
18  
19  
20  
21  
22  
23  
24  
25  
26  
27  
28  
29  
30  
31  
32  
33  
34  
35  
36  
37  
38  
39  
40  
41  
42  
43  
44  
45  
46  
47  
48  
49  
50  
51  
52  
53  
54  
55  
56  
57  
58  
59  
60

For peer review only

## Options for systemic interventions to improve reporting

Ongoing reporting deficiencies in clinical trials highlight the need for systemic interventions to improve reporting. The 2010 CONSORT guideline has been endorsed by more than 50% of the core medical journals and the ICMJE (78). Transparent research practices and reporting need to be incentivized on different levels and by different stakeholders in the academic research lifecycle (79,80). Persistent reporting deficiencies (12,21) indicate that endorsement without enforcement is insufficient (81,82), and engaging individuals, journals, funders, and institutions is necessary to improve reporting (79,83).

One option to improve reporting is for journals to enforce existing guidelines and policies. All journals in our sample were peer reviewed; yet there were major essential details were often missing from published trials. This suggests that peer review alone is insufficient. Alternatives include rigorous manual review by trained “trial reporting” assessors, automated screening or a combined approach. A journal program that trained early career researchers to check for common data visualization errors was well accepted by authors and increased compliance with data presentation guidelines (84). Implementing similar programs, using paid staff, could improve CONSORT compliance. Alternatively, automated screening tools may efficiently flag missing information for peer reviewers (85,86). Peer review systems at several journals include an automated tool that checks statistical reporting and guideline adherence (87). Tools are available to screen for risk of bias (RobotReviewer;RRID:SCR\_021064 (88)), and CONSORT methodology criteria (CONSORT-TM;RRID:SCR\_021051 (89)). The CONSORT tool performs well for frequently reported criteria, but needs more training data for less often reported criteria (89). New tools may need to be created to assess details like the specifics of allocation concealment, blinding of specific stakeholders, or justifications of expected effect sizes. As 52% of clinical trials in our sample were published in only five journals, systemic efforts to improve reporting on journal level can make a noticeable difference on clinical trial reporting in the field.

1  
2  
3 A second option is automated screening of sports medicine and orthopedics preprints. Preprints,  
4 which are posted on public servers such as medRxiv and sportRxiv prior to peer review, allow  
5 authors to receive feedback and improve their manuscripts before journal submission. Large-scale  
6 automated screening of bioRxiv and medRxiv preprints for rigor and transparency criteria is  
7 feasible and could raise awareness about factors affecting transparency and reproducibility (90).  
8 Automated screening has limitations – the tools make mistakes and cannot always determine  
9 whether a particular item is relevant to a given study. Automated screening may complement peer  
10 review, but is not a replacement. The value of this approach will also depend on the proportion of  
11 trials that are posted as preprints.  
12  
13  
14  
15  
16  
17  
18  
19  
20  
21

22 Dashboards may offer a third option for monitoring changes in practice over time, and raising  
23 awareness about the importance of specific reporting practices among researchers, policymakers  
24 and the public. When used to inform incentives systems, dashboards may potentially contribute  
25 to improved reporting. Dashboards may work best in combination with other measures, like policy  
26 changes, incorporating practices described in dashboards into researcher assessments, or  
27 rewarding researchers for improving reporting.. Policymakers and the scientific community can  
28 use dashboards to evaluate the effectiveness of interventions to improve scientific practice.  
29 Dashboards can show if interventions fail to make an impact on scientific practice or that further  
30 incentives are needed to drive the desired change. Examples include dashboards on open science  
31 (91), and trial results reporting (92). In sports medicine and orthopedics, clinical trial dashboards  
32 could track transparent research practices for journals, society publishers, or all publications, and  
33 should include commonly missed items identified in this study. Researchers may need to develop  
34 new automated tools to track some criteria.  
35  
36  
37  
38  
39  
40  
41  
42  
43  
44  
45  
46  
47  
48  
49

50 The scientific community has long relied on educational resources to improve reporting. On-  
51 demand resources include the CONSORT guideline use webinar by Altman (93), and open  
52 webinars on pre-registration, sample size justification and other topics offered by the Society for  
53 Transparency, Openness, and Replication in Kinesiology (94). Creating a single platform with  
54  
55  
56  
57  
58  
59

1  
2  
3 field-relevant resources; then collaborating with large journals, publishers, and societies, may help  
4  
5 to disseminate materials to the global orthopedics and sports medicine community.  
6  
7

## 8 **Limitations**

9

10  
11 Our CONSORT-based evaluation criteria for intervention reporting were not optimized for non-  
12  
13 exercise or wait-and-see control interventions. While the assessments required by guidelines for  
14  
15 intervention reporting (52,53) were beyond the scope of this study, previous studies assessed  
16  
17 intervention reporting in detail (17,51,54,95). Larger, confirmatory studies are needed to examine  
18  
19 relationships between different variables, as odds ratios calculated in the present study were  
20  
21 exploratory post-hoc calculations. We examined the top 25% sports medicine and orthopedics  
22  
23 journals; hence our findings may not be generalizable to journals that are not indexed by PubMed,  
24  
25 lower tier journals, non-English journals, or unpublished trials. The use of the clinical trial filter may  
26  
27 have led to the exclusion of a small number of trials that were incorrectly classified upon indexing.  
28  
29  
30

## 31 **Conclusions**

32  
33  
34

35 The present study in recent sports medicine and orthopedic clinical trials shows that authors often  
36  
37 report general information on rigor criteria but few provide the essential details to assess risk of  
38  
39 bias required by existing guidelines. Examples include the blinding status of all main stakeholders,  
40  
41 information on the concealed assignment, or the justification of expected effect sizes in sample  
42  
43 size calculations. Further, transparent research practices like pre-registration or data sharing are  
44  
45 rarely used in sports medicine and orthopedics.  
46  
47

48 As reporting guidelines for clinical trial reporting are long established and well accepted across  
49  
50 medical fields, the persistent lack of detailed reporting suggests that education and existing  
51  
52 guidelines alone are not working. Better incentives, further interventions, and other innovative  
53  
54 approaches are needed to improve clinical trial reporting further. We present different options for  
55  
56 future interventions might investigate rigorous peer-reviewer training, automated screening of  
57  
58  
59

1  
2  
3 submitted manuscripts and preprints, and field-specific dashboards to monitor reporting and  
4 transparent research practices to increase awareness and track improvements over time. Our  
5 results show which aspects of clinical trial reporting have the greatest need for improvement.  
6  
7 Researchers can use this data to tailor future interventions to improve reporting to the needs of  
8  
9 the sports medicine and orthopedics community.  
10  
11  
12  
13  
14  
15  
16  
17  
18  
19  
20  
21  
22  
23  
24  
25  
26  
27  
28  
29  
30  
31  
32  
33  
34  
35  
36  
37  
38  
39  
40  
41  
42  
43  
44  
45  
46  
47  
48  
49  
50  
51  
52  
53  
54  
55  
56  
57  
58  
59  
60

For peer review only

## Data availability statement

All data are available on the OSF (96) and may be accessed under the Creative Commons Attribution 4.0 International License at the following link: <https://osf.io/q8b46/>

## Contributorship statement

Conceptualization: Robert Schulz and Tracey Weissgerber.

Data curation: Robert Schulz and Georg Langen.

Formal analysis: Robert Schulz.

Investigation: Robert Schulz, Georg Langen, and Robert Prill.

Methodology: Robert Schulz and Tracey Weissgerber.

Project administration: Robert Schulz.

Supervision: Michael Cassel and Tracey Weissgerber.

Validation: Robert Schulz and Georg Langen.

Visualization: Robert Schulz and Tracey Weissgerber.

Writing - original draft: Robert Schulz and Tracey Weissgerber.

Writing - review & editing: Robert Schulz, Georg Langen, Robert Prill, Michael Cassel, and Tracey Weissgerber.

## Patient and public involvement

This meta-research study is not directly related to patients. Therefore, patients or the public were not involved in the design, or conduct, or reporting, or dissemination plans of our research.

## Research Ethics Approval

This is a meta-research study that does not involve human or animal participation and did not require ethical approval.

## Acknowledgements

We would like to acknowledge Mia Pattillo for her valuable contributions to extracting the registration status of trials.

## Funding

This research received no specific grant from any funding agency in the public, commercial, or not-for-profit sectors.

## Competing Interests

All authors declare no competing interests.

**Figure 1** Reporting prevalence for rigor and sample criteria. This plot displays the percentage of trials that addressed each criteria. For information on the actual randomization or blinding status, please refer to the text. The different colored data points are for better visual differentiation of each subcategory. Created by the authors.

**Figure 2** The blinding status across the main different stakeholder groups across all clinical trials (n=163). Created by the authors.

**Figure 3** Reporting prevalence for data analysis and transparency criteria. This plot displays the percentage of trials that addressed each criteria. Abbreviations: NHST, null hypothesis statistical testing; ES, effect size. Created by the authors.

**Figure 4** A priori sample size calculations are essential for generating meaningful results with clinical trials. Created by the authors.



## References

1. Emanuel EJ, Wendler D, Grady C. What makes clinical research ethical? *JAMA*. 2000;283(20):2701–11. doi:10.1001/jama.283.20.2701 Cited in: PubMed; PMID 10819955.
2. Califf RM, DeMets DL. Principles from clinical trials relevant to clinical practice: Part I. *Circulation*. 2002;106(8):1015–21. doi:10.1161/01.CIR.0000023260.78078.BB Cited in: PubMed; PMID 12186809.
3. Gerstein HC, McMurray J, Holman RR. Real-world studies no substitute for RCTs in establishing efficacy. *The Lancet*. 2019;393(10168):210–1. doi:10.1016/S0140-6736(18)32840-X
4. Zarin DA, Goodman SN, Kimmelman J. Harms From Uninformative Clinical Trials. *JAMA*. 2019. doi:10.1001/jama.2019.9892 Cited in: PubMed; PMID 31343666.
5. Feudtner C, Schreiner M, Lantos JD. Risks (and benefits) in comparative effectiveness research trials. *N Engl J Med*. 2013;369(10):892–4. doi:10.1056/NEJMp1309322 Cited in: PubMed; PMID 23964898.
6. van Delden JJM, van der Graaf R. Revised CIOMS International Ethical Guidelines for Health-Related Research Involving Humans. *JAMA*. 2017;317(2):135–6. doi:10.1001/jama.2016.18977 Cited in: PubMed; PMID 27923072.
7. Schulz KF, Altman DG, Moher D. CONSORT 2010 statement: updated guidelines for reporting parallel group randomised trials. *PLoS Med*. 2010;7(3):e1000251. doi:10.1371/journal.pmed.1000251 Cited in: PubMed; PMID 20352064.
8. Moher D, Hopewell S, Schulz KF, Montori V, Gøtzsche PC, Devereaux PJ, Elbourne D, Egger M, Altman DG. CONSORT 2010 explanation and elaboration: updated guidelines for reporting parallel group randomised trials. *BMJ*. 2010;340c869. doi:10.1136/bmj.c869 Cited in: PubMed; PMID 20332511.
9. ICMJE. Recommendations for the Conduct, Reporting, Editing and Publication of Scholarly Work in Medical Journals [Internet]. 2020 [cited 2020 Aug 4]. Available from: <http://www.ICMJE.org>.
10. Moher D, Simera I, Schulz KF, Hoey J, Altman DG. Helping editors, peer reviewers and authors improve the clarity, completeness and transparency of reporting health research. *BMC Med*. 2008;6:13. doi:10.1186/1741-7015-6-13 Cited in: PubMed; PMID 18558004.
11. Turner L, Shamseer L, Altman DG, Schulz KF, Moher D. Does use of the CONSORT Statement impact the completeness of reporting of randomised controlled trials published in medical journals? A Cochrane review. *Syst Rev*. 2012;160. doi:10.1186/2046-4053-1-60 Cited in: PubMed; PMID 23194585.
12. Dechartres A, Trinquart L, Atal I, Moher D, Dickersin K, Boutron I, Perrodeau E, Altman DG, Ravaud P. Evolution of poor reporting and inadequate methods over time in 20 920 randomised controlled trials included in Cochrane reviews: research on research study. *BMJ*. 2017;357j2490. doi:10.1136/bmj.j2490 Cited in: PubMed; PMID 28596181.
13. Chess LE, Gagnier J. Risk of bias of randomized controlled trials published in orthopaedic journals. *BMC Med Res Methodol*. 2013;13:76. doi:10.1186/1471-2288-13-76 Cited in: PubMed; PMID 23758875.
14. Nielsen RO, Shrier I, Casals M, Nettel-Aguirre A, Møller M, Bolling C, Bittencourt NFN, Clarsen B, Wedderkopp N, Soligard T, Timpka T, Emery C, Bahr R, Jacobsson J, Whiteley R, Dahlstrom O, van Dyk N, Pluim BM, Stamatakis E, Palacios-Derflingher L, Fagerland MW, Khan KM, Ardern CL, Verhagen E. Statement on methods in sport injury research from the 1st METHODS MATTER

- 1  
2  
3 Meeting, Copenhagen, 2019. *Br J Sports Med.* 2020;54(15):941. doi:10.1136/bjsports-2019-  
4 101323 Cited in: PubMed; PMID 32371524.
- 5  
6 15. Zenko Z, Steele J, Mills J. *Communications in Kinesiology: A new open access journal from the*  
7 *Society for Transparency, Openness, and Replication in Kinesiology*; 2020. en.
- 8  
9 16. Verhagen E, Stovitz SD, Mansournia MA, Nielsen RO, Shrier I. *BJSM educational editorials:*  
10 *methods matter.* *Br J Sports Med.* 2018;52(18):1159–60. doi:10.1136/bjsports-2017-097998 Cited  
11 in: PubMed; PMID 28818955.
- 12  
13 17. Holden S, Rathleff MS, Jensen MB, Barton CJ. How can we implement exercise therapy for  
14 patellofemoral pain if we don't know what was prescribed? A systematic review. *Br J Sports Med.*  
15 2018;52(6):385. doi:10.1136/bjsports-2017-097547 Cited in: PubMed; PMID 29084726.
- 16  
17 18. Losina E. Why past research successes do not translate to clinical reality: gaps in evidence on  
18 exercise program efficacy. *Osteoarthritis Cartilage.* 2019;27(1):1–2.  
19 doi:10.1016/j.joca.2018.09.006 Cited in: PubMed; PMID 30248501.
- 20  
21 19. Knudson D. Confidence crisis of results in biomechanics research. *Sports Biomech.*  
22 2017;16(4):425–33. doi:10.1080/14763141.2016.1246603 Cited in: PubMed; PMID 28632059.
- 23  
24 20. Büttner F, Toomey E, McClean S, Roe M, Delahunt E. Are questionable research practices  
25 facilitating new discoveries in sport and exercise medicine? The proportion of supported  
26 hypotheses is implausibly high. *Br J Sports Med.* 2020. doi:10.1136/bjsports-2019-101863 Cited in:  
27 PubMed; PMID 32699001.
- 28  
29 21. Kane RL, Wang J, Garrard J. Reporting in randomized clinical trials improved after adoption of the  
30 CONSORT statement. *J Clin Epidemiol.* 2007;60(3):241–9. doi:10.1016/j.jclinepi.2006.06.016 Cited  
31 in: PubMed; PMID 17292017.
- 32  
33 22. Banks GC, O'Boyle EH, Pollack JM, White CD, Batchelor JH, Whelpley CE, Abston KA, Bennett AA,  
34 Adkins CL. Questions About Questionable Research Practices in the Field of Management. *Journal*  
35 *of Management.* 2016;42(1):5–20. doi:10.1177/0149206315619011
- 36  
37 23. Hutton JL, Williamson PR. Bias in meta-analysis due to outcome variable selection within studies.  
38 *Journal of the Royal Statistical Society: Series C (Applied Statistics).* 2000;49(3):359–70.  
39 doi:10.1111/1467-9876.00197
- 40  
41 24. Bernard R, Weissgerber TL, Bobrov E, Winham SJ, Dirnagl U, Riedel N. fiddle: a tool to combat  
42 publication bias by getting research out of the file drawer and into the scientific community. *Clin*  
43 *Sci (Lond).* 2020;134(20):2729–39. doi:10.1042/CS20201125 Cited in: PubMed; PMID 33111948.
- 44  
45 25. Chambers C. What's next for Registered Reports? *Nature.* 2019;573(7773):187–9.  
46 doi:10.1038/d41586-019-02674-6 Cited in: PubMed; PMID 31506624.
- 47  
48 26. Caldwell AR, Vigotsky AD, Tenan MS, Radel R, Mellor DT, Kreutzer A, Lahart IM, Mills JP,  
49 Boisgontier MP. Moving Sport and Exercise Science Forward: A Call for the Adoption of More  
50 Transparent Research Practices. *Sports Med.* 2020;50(3):449–59. doi:10.1007/s40279-019-01227-  
51 1 Cited in: PubMed; PMID 32020542.
- 52  
53 27. Chalmers I. Underreporting Research Is Scientific Misconduct. *JAMA.* 1990;263(10):1405.  
54 doi:10.1001/jama.1990.03440100121018
- 55  
56 28. Hopewell S, Loudon K, Clarke MJ, Oxman AD, Dickersin K. Publication bias in clinical trials due to  
57 statistical significance or direction of trial results. *Cochrane Database Syst Rev.*  
58 2009;(1):MR000006. doi:10.1002/14651858.MR000006.pub3 Cited in: PubMed; PMID 19160345.
- 59

- 1
  - 2
  - 3
  - 4
  - 5
  - 6
  - 7
  - 8
  - 9
  - 10
  - 11
  - 12
  - 13
  - 14
  - 15
  - 16
  - 17
  - 18
  - 19
  - 20
  - 21
  - 22
  - 23
  - 24
  - 25
  - 26
  - 27
  - 28
  - 29
  - 30
  - 31
  - 32
  - 33
  - 34
  - 35
  - 36
  - 37
  - 38
  - 39
  - 40
  - 41
  - 42
  - 43
  - 44
  - 45
  - 46
  - 47
  - 48
  - 49
  - 50
  - 51
  - 52
  - 53
  - 54
  - 55
  - 56
  - 57
  - 58
  - 59
  - 60
29. Dwan K, Gamble C, Williamson PR, Kirkham JJ. Systematic review of the empirical evidence of study publication bias and outcome reporting bias - an updated review. *PLoS ONE*. 2013;8(7):e66844. doi:10.1371/journal.pone.0066844 Cited in: PubMed; PMID 23861749.
30. Kirkham JJ, Altman DG, Chan A-W, Gamble C, Dwan KM, Williamson PR. Outcome reporting bias in trials: a methodological approach for assessment and adjustment in systematic reviews. *BMJ*. 2018;362k3802. doi:10.1136/bmj.k3802 Cited in: PubMed; PMID 30266736.
31. Nunan D, Aronson J, Bankhead C. Catalogue of bias: attrition bias. *BMJ Evid Based Med*. 2018;23(1):21–2. doi:10.1136/ebmed-2017-110883 Cited in: PubMed; PMID 29367321.
32. ICMJE. Recommendations | Preparing a Manuscript for Submission to a Medical Journal: Methods - statistics [Internet]. 2021 [updated 2021 Apr 14; cited 2021 Apr 14]. Available from: <http://www.icmje.org/recommendations/browse/manuscript-preparation/preparing-for-submission.html>
33. Kerr NL. HARKing: hypothesizing after the results are known. *Pers Soc Psychol Rev*. 1998;2(3):196–217. doi:10.1207/s15327957pspr0203\_4 Cited in: PubMed; PMID 15647155.
34. SCImago (SJR — SCImago Journal & Country Rank [Portal] [Internet]. 2020 [cited 2021 Feb 22]. Available from: <https://www.scimagojr.com/journalrank.php?category=2732>
35. Ouzzani M, Hammady H, Fedorowicz Z, Elmagarmid A. Rayyan-a web and mobile app for systematic reviews. *Syst Rev*. 2016;5(1):210. doi:10.1186/s13643-016-0384-4 Cited in: PubMed; PMID 27919275.
36. BIH QUEST. Open Science - BIH [Internet]. 2021 [updated 2021 Jan 22; cited 2021 Jan 22]. Available from: <https://www.bihealth.org/en/research/quest-center/mission-approaches/open-science>
37. Nosek BA, Alter G, Banks GC, Borsboom D, Bowman SD, Breckler SJ, Buck S, Chambers CD, Chin G, Christensen G, Contestabile M, Dafoe A, Eich E, Freese J, Glennerster R, Goroff D, Green DP, Hesse B, Humphreys M, Ishiyama J, Karlan D, Kraut A, Lupia A, Mabry P, Madon TA, Malhotra N, Mayo-Wilson E, McNutt M, Miguel E, Paluck EL, Simonsohn U, Soderberg C, Spellman BA, Turitto J, VandenBos G, Vazire S, Wagenmakers EJ, Wilson R, Yarkoni T. SCIENTIFIC STANDARDS. Promoting an open research culture. *Science*. 2015;348(6242):1422–5. doi:10.1126/science.aab2374 Cited in: PubMed; PMID 26113702.
38. Button KS, Ioannidis JPA, Mokrysz C, Nosek BA, Flint J, Robinson ESJ, Munafò MR. Power failure: why small sample size undermines the reliability of neuroscience. *Nat Rev Neurosci*. 2013;14(5):365–76. doi:10.1038/nrn3475 Cited in: PubMed; PMID 23571845.
39. Charles P, Giraudeau B, Dechartres A, Baron G, Ravaud P. Reporting of sample size calculation in randomised controlled trials: review. *BMJ*. 2009;338b1732. doi:10.1136/bmj.b1732 Cited in: PubMed; PMID 19435763.
40. Abdul Latif L, Daud Amadera JE, Pimentel D, Pimentel T, Fregni F. Sample size calculation in physical medicine and rehabilitation: a systematic review of reporting, characteristics, and results in randomized controlled trials. *Arch Phys Med Rehabil*. 2011;92(2):306–15. doi:10.1016/j.apmr.2010.10.003 Cited in: PubMed; PMID 21272730.
41. Hewitt C, Hahn S, Torgerson DJ, Watson J, Bland JM. Adequacy and reporting of allocation concealment: review of recent trials published in four general medical journals. *BMJ*. 2005;330(7499):1057–8. doi:10.1136/bmj.38413.576713.AE Cited in: PubMed; PMID 15760970.

- 1
  - 2
  - 3
  - 4
  - 5
  - 6
  - 7
  - 8
  - 9
  - 10
  - 11
  - 12
  - 13
  - 14
  - 15
  - 16
  - 17
  - 18
  - 19
  - 20
  - 21
  - 22
  - 23
  - 24
  - 25
  - 26
  - 27
  - 28
  - 29
  - 30
  - 31
  - 32
  - 33
  - 34
  - 35
  - 36
  - 37
  - 38
  - 39
  - 40
  - 41
  - 42
  - 43
  - 44
  - 45
  - 46
  - 47
  - 48
  - 49
  - 50
  - 51
  - 52
  - 53
  - 54
  - 55
  - 56
  - 57
  - 58
  - 59
  - 60
42. Armijo-Olivo S, Saltaji H, da Costa BR, Fuentes J, Ha C, Cummings GG. What is the influence of randomisation sequence generation and allocation concealment on treatment effects of physical therapy trials? A meta-epidemiological study. *BMJ Open*. 2015;5(9):e008562. doi:10.1136/bmjopen-2015-008562 Cited in: PubMed; PMID 26338841.
43. Holman L, Head ML, Lanfear R, Jennions MD. Evidence of Experimental Bias in the Life Sciences: Why We Need Blind Data Recording. *PLoS Biol*. 2015;13(7):e1002190. doi:10.1371/journal.pbio.1002190 Cited in: PubMed; PMID 26154287.
44. Haahr MT, Hróbjartsson A. Who is blinded in randomized clinical trials? A study of 200 trials and a survey of authors. *Clin Trials*. 2006;3(4):360–5. doi:10.1177/1740774506069153 Cited in: PubMed; PMID 17060210.
45. Mathieu S, Boutron I, Moher D, Altman DG, Ravaud P. Comparison of registered and published primary outcomes in randomized controlled trials. *JAMA*. 2009;302(9):977–84. doi:10.1001/jama.2009.1242 Cited in: PubMed; PMID 19724045.
46. Chen T, Li C, Qin R, Wang Y, Yu D, Dodd J, Wang D, Cornelius V. Comparison of Clinical Trial Changes in Primary Outcome and Reported Intervention Effect Size Between Trial Registration and Publication. *JAMA Netw Open*. 2019;2(7):e197242. doi:10.1001/jamanetworkopen.2019.7242 Cited in: PubMed; PMID 31322690.
47. Nuijten MB, Hartgerink CHJ, van Assen MALM, Epskamp S, Wicherts JM. The prevalence of statistical reporting errors in psychology (1985–2013). *Behav Res Methods*. 2016;48(4):1205–26. doi:10.3758/s13428-015-0664-2 Cited in: PubMed; PMID 26497820.
48. Lakens D. Calculating and reporting effect sizes to facilitate cumulative science: a practical primer for t-tests and ANOVAs. *Front Psychol*. 2013;4:863. doi:10.3389/fpsyg.2013.00863 Cited in: PubMed; PMID 24324449.
49. Weissgerber TL, Milic NM, Winham SJ, Garovic VD. Beyond bar and line graphs: time for a new data presentation paradigm. *PLoS Biol*. 2015;13(4):e1002128. doi:10.1371/journal.pbio.1002128 Cited in: PubMed; PMID 25901488.
50. Weissgerber TL, Winham SJ, Heinzen EP, Milin-Lazovic JS, Garcia-Valencia O, Bukumiric Z, Savic MD, Garovic VD, Milic NM. Reveal, Don't Conceal: Transforming Data Visualization to Improve Transparency. *Circulation*. 2019;140(18):1506–18. doi:10.1161/CIRCULATIONAHA.118.037777 Cited in: PubMed; PMID 31657957.
51. Slade SC, Keating JL. Exercise prescription: a case for standardised reporting. *Br J Sports Med*. 2012;46(16):1110–3. doi:10.1136/bjsports-2011-090290 Cited in: PubMed; PMID 22089077.
52. Hoffmann TC, Glasziou PP, Boutron I, Milne R, Perera R, Moher D, Altman DG, Barbour V, Macdonald H, Johnston M, Lamb SE, Dixon-Woods M, McCulloch P, Wyatt JC, Chan A-W, Michie S. Better reporting of interventions: template for intervention description and replication (TIDieR) checklist and guide. *BMJ*. 2014;348:g1687. doi:10.1136/bmj.g1687 Cited in: PubMed; PMID 24609605.
53. Slade SC, Dionne CE, Underwood M, Buchbinder R, Beck B, Bennell K, Brosseau L, Costa L, Cramp F, Cup E, Feehan L, Ferreira M, Forbes S, Glasziou P, Habets B, Harris S, Hay-Smith J, Hillier S, Hinman R, Holland A, Hondras M, Kelly G, Kent P, Lauret G-J, Long A, Maher C, Morso L, Osteras N, Peterson T, Quinlivan R, Rees K, Regnaud J-P, Rietberg M, Saunders D, Skoetz N, Sogaard K, Takken T, van Tulder M, Voet N, Ward L, White C. Consensus on Exercise Reporting Template (CERT):

- 1  
2  
3 Modified Delphi Study. *Phys Ther*. 2016;96(10):1514–24. doi:10.2522/ptj.20150668 Cited in:  
4 PubMed; PMID 27149962.  
5  
6 54. Verhagen EALM, Hupperets MDW, Finch CF, van Mechelen W. The impact of adherence on sports  
7 injury prevention effect estimates in randomised controlled trials: looking beyond the CONSORT  
8 statement. *J Sci Med Sport*. 2011;14(4):287–92. doi:10.1016/j.jsams.2011.02.007 Cited in:  
9 PubMed; PMID 21429793.  
10  
11 55. ICMJE. Recommendations | Clinical Trials [Internet]. 2021 [updated 2021 Jan 19; cited  
12 2021 Jan 19]. Available from: [http://www.icmje.org/recommendations/browse/publishing-and-](http://www.icmje.org/recommendations/browse/publishing-and-editorial-issues/clinical-trial-registration.html)  
13 [editorial-issues/clinical-trial-registration.html](http://www.icmje.org/recommendations/browse/publishing-and-editorial-issues/clinical-trial-registration.html)  
14  
15 56. McKiernan EC, Bourne PE, Brown CT, Buck S, Kenall A, Lin J, McDougall D, Nosek BA, Ram K,  
16 Soderberg CK, Spies JR, Thaney K, Updegrave A, Woo KH, Yarkoni T. How open science helps  
17 researchers succeed. *Elife*. 2016;5. doi:10.7554/eLife.16800 Cited in: PubMed; PMID 27387362.  
18  
19 57. Vasilevsky NA, Minnier J, Haendel MA, Champieux RE. Reproducible and reusable research: are  
20 journal data sharing policies meeting the mark? *PeerJ*. 2017;5e3208. doi:10.7717/peerj.3208 Cited  
21 in: PubMed; PMID 28462024.  
22  
23 58. European Commission. Facts and Figures for open research data: Figures and case studies related to  
24 accessing and reusing the data produced in the course of scientific production. [Internet]. 2019  
25 [updated 2019 Nov 5; cited 2021 Apr 8]. Available from: [https://ec.europa.eu/info/research-and-](https://ec.europa.eu/info/research-and-innovation/strategy/goals-research-and-innovation-policy/open-science/open-science-monitor/facts-and-figures-open-research-data_en#funderspolicies)  
26 [innovation/strategy/goals-research-and-innovation-policy/open-science/open-science-](https://ec.europa.eu/info/research-and-innovation/strategy/goals-research-and-innovation-policy/open-science/open-science-monitor/facts-and-figures-open-research-data_en#funderspolicies)  
27 [monitor/facts-and-figures-open-research-data\\_en#funderspolicies](https://ec.europa.eu/info/research-and-innovation/strategy/goals-research-and-innovation-policy/open-science/open-science-monitor/facts-and-figures-open-research-data_en#funderspolicies)  
28  
29 59. Halperin I, Vigotsky AD, Foster C, Pyne DB. Strengthening the Practice of Exercise and Sport-  
30 Science Research. *Int J Sports Physiol Perform*. 2018;13(2):127–34. doi:10.1123/ijsspp.2017-0322  
31 Cited in: PubMed; PMID 28787228.  
32  
33 60. Barnes C, Boutron I, Giraudeau B, Porcher R, Altman DG, Ravaud P. Impact of an online writing aid  
34 tool for writing a randomized trial report: the COBWEB (Consort-based WEB tool) randomized  
35 controlled trial. *BMC Med*. 2015;13(1):221. doi:10.1186/s12916-015-0460-y Cited in: PubMed;  
36 PMID 26370288.  
37  
38 61. Angelis C de, Drazen JM, Frizelle FA, Haug C, Hoey J, Horton R, Kotzin S, Laine C, Marusic A,  
39 Overbeke AJPM, Schroeder TV, Sox HC, van der Weyden MB. Clinical trial registration: a statement  
40 from the International Committee of Medical Journal Editors. *Ann Intern Med*. 2004;141(6):477–8.  
41 doi:10.7326/0003-4819-141-6-200409210-00109 Cited in: PubMed; PMID 15355883.  
42  
43 62. Lakens D. Sample Size Justification; 2021.  
44  
45 63. Harris JD, Cvetanovich G, Erickson BJ, Abrams GD, Chahal J, Gupta AK, McCormick FM, Bach BR.  
46 Current status of evidence-based sports medicine. *Arthroscopy*. 2014;30(3):362–71.  
47 doi:10.1016/j.arthro.2013.11.015 Cited in: PubMed; PMID 24581261.  
48  
49 64. Twomey R, Yingling V, Warne J, Schneider C, McCrum C, Atkins W, Murphy J, Romero Medina C,  
50 Harlley S, Caldwell A. Nature of Our Literature. *Commun in Kinesiology*. 2021;1(3).  
51 doi:10.51224/cik.v1i3.43  
52  
53 65. Warren M. First analysis of ‘pre-registered’ studies shows sharp rise in null findings. *Nature*. 2018.  
54 doi:10.1038/d41586-018-07118-1  
55  
56 66. Christensen G, Dafoe A, Miguel E, Moore DA, Rose AK. A study of the impact of data sharing on  
57 article citations using journal policies as a natural experiment. *PLOS ONE*. 2019;14(12):e0225883.  
58 doi:10.1371/journal.pone.0225883 Cited in: PubMed; PMID 31851689.  
59

- 1  
2  
3 67. Colavizza G, Hrynaszkiewicz I, Staden I, Whitaker K, McGillivray B. The citation advantage of linking  
4 publications to research data. *PLOS ONE*. 2020;15(4):e0230416.  
5 doi:10.1371/journal.pone.0230416 Cited in: PubMed; PMID 32320428.  
6
- 7 68. Lesk M, Mattern JB, Moulaison Sandy H. Are Papers with Open Data More Credible? An Analysis of  
8 Open Data Availability in Retracted PLoS Articles. In: Taylor NG, Christian-Lamb C, Martin MH,  
9 Nardi B, editors. *Information in Contemporary Society*. Cham: Springer International Publishing;  
10 2019. p. 154–61. (Lecture Notes in Computer Science; vol. 11420).  
11
- 12 69. Lo B, DeMets DL. Incentives for Clinical Trialists to Share Data. *N Engl J Med*. 2016;375(12):1112–5.  
13 doi:10.1056/NEJMp1608351 Cited in: PubMed; PMID 27653562.  
14
- 15 70. Mello MM, Francer JK, Wilenzick M, Teden P, Bierer BE, Barnes M. Preparing for responsible  
16 sharing of clinical trial data. *N Engl J Med*. 2013;369(17):1651–8. doi:10.1056/NEJMhle1309073  
17 Cited in: PubMed; PMID 24144394.  
18
- 19 71. Taichman DB, Sahni P, Pinborg A, Peiperl L, Laine C, James A, Hong S-T, Haileamlak A, Gollogly L,  
20 Godlee F, Frizelle FA, Florenzano F, Drazen JM, Bauchner H, Baethge C, Backus J. Data Sharing  
21 Statements for Clinical Trials - A Requirement of the International Committee of Medical Journal  
22 Editors. *N Engl J Med*. 2017;376(23):2277–9. doi:10.1056/NEJMe1705439 Cited in: PubMed; PMID  
23 28581902.  
24
- 25 72. Keerie C, Tuck C, Milne G, Eldridge S, Wright N, Lewis SC. Data sharing in clinical trials - practical  
26 guidance on anonymising trial datasets. *Trials*. 2018;19(1):25. doi:10.1186/s13063-017-2382-9  
27 Cited in: PubMed; PMID 29321053.  
28
- 29 73. Vines TH, Albert AYK, Andrew RL, Débarre F, Bock DG, Franklin MT, Gilbert KJ, Moore J-S, Renaut S,  
30 Rennison DJ. The availability of research data declines rapidly with article age. *Curr Biol*.  
31 2014;24(1):94–7. doi:10.1016/j.cub.2013.11.014 Cited in: PubMed; PMID 24361065.  
32
- 33 74. Nosek B. Estimating the reproducibility of psychological science. *Science*. 2015;349(6251):aac4716.  
34 doi:10.1126/science.aac4716 Cited in: PubMed; PMID 26315443.  
35
- 36 75. Riedel N, Schulz R, Kazezian V, Weissgerber T. Replacing bar graphs of continuous data with more  
37 informative graphics: Are we making progress?; 2022.
- 38 76. García-Berthou E, Alcaraz C. Incongruence between test statistics and P values in medical papers.  
39 *BMC Med Res Methodol*. 2004;4(1):13. doi:10.1186/1471-2288-4-13 Cited in: PubMed; PMID  
40 15169550.  
41
- 42 77. Costello JT, Bieuzen F, Bleakley CM. Where are all the female participants in Sports and Exercise  
43 Medicine research? *Eur J Sport Sci*. 2014;14(8):847–51. doi:10.1080/17461391.2014.911354 Cited  
44 in: PubMed; PMID 24766579.  
45
- 46 78. CONSORT. Consort - Endorsers [Internet]. 2021 [updated 2021 Mar 19; cited 2021 Mar 19].  
47 Available from: <http://www.consort-statement.org/about-consort/endorsers1>  
48
- 49 79. MacLeod MR, Michie S, Roberts I, Dirnagl U, Chalmers I, Ioannidis JPA, Salman RA-S, Chan A-W,  
50 Glasziou P. Biomedical research: increasing value, reducing waste. *The Lancet*.  
51 2014;383(9912):101–4. doi:10.1016/S0140-6736(13)62329-6  
52
- 53 80. Mellor D. Improving norms in research culture to incentivize transparency and rigor. *Educational*  
54 *Psychologist*. 2021;56(2):122–31. doi:10.1080/00461520.2021.1902329  
55
- 56 81. Hirst A, Altman DG. Are peer reviewers encouraged to use reporting guidelines? A survey of 116  
57 health research journals. *PLoS ONE*. 2012;7(4):e35621. doi:10.1371/journal.pone.0035621 Cited  
58 in: PubMed; PMID 22558178.  
59  
60

- 1  
2  
3 82. Shamseer L, Hopewell S, Altman DG, Moher D, Schulz KF. Update on the endorsement of  
4 CONSORT by high impact factor journals: a survey of journal "Instructions to Authors" in 2014.  
5 *Trials*. 2016;17(1):301. doi:10.1186/s13063-016-1408-z Cited in: PubMed; PMID 27343072.  
6  
7 83. Moher D. Reporting guidelines: doing better for readers. *BMC Med*. 2018;16(1):233.  
8 doi:10.1186/s12916-018-1226-0 Cited in: PubMed; PMID 30545364.  
9  
10 84. Keehan KH, Gaffney MC, Zucker IH. CORP: Assessing author compliance with data presentation  
11 guidelines for manuscript figures. *Am J Physiol Heart Circ Physiol*. 2020;318(5):H1051-H1058.  
12 doi:10.1152/ajpheart.00071.2020 Cited in: PubMed; PMID 32196356.  
13  
14 85. Halfman W, Horbach SPJM. What are innovations in peer review and editorial assessment for?  
15 *Genome Biol*. 2020;21(1):87. doi:10.1186/s13059-020-02004-4 Cited in: PubMed; PMID 32362286.  
16  
17 86. Checco A, Bracciale L, Loreti P, Pinfield S, Bianchi G. AI-assisted peer review. *Humanit Soc Sci*  
18 *Commun*. 2021;8(1):1–11. En;en. doi:10.1057/s41599-020-00703-8  
19  
20 87. BMC. Advancing peer review at BMC [Internet]. 2021 [updated 2021 Apr 8; cited 2021 Apr 8].  
21 Available from: <https://www.biomedcentral.com/about/advancing-peer-review>  
22  
23 88. Soboczenski F, Trikalinos TA, Kuiper J, Bias RG, Wallace BC, Marshall IJ. Machine learning to help  
24 researchers evaluate biases in clinical trials: a prospective, randomized user study. *BMC Med*  
25 *Inform Decis Mak*. 2019;19(1):96. doi:10.1186/s12911-019-0814-z Cited in: PubMed; PMID  
26 31068178.  
27  
28 89. Kilicoglu H, Rosemblat G, Hoang L, Wadhwa S, Peng Z, Malički M, Schneider J, Ter Riet G. Toward  
29 assessing clinical trial publications for reporting transparency. *J Biomed Inform*. 2021;116:103717.  
30 doi:10.1016/j.jbi.2021.103717 Cited in: PubMed; PMID 33647518.  
31  
32 90. Weissgerber T, Riedel N, Kilicoglu H, Labbé C, Eckmann P, Ter Riet G, Byrne J, Cabanac G, Capes-  
33 Davis A, Favier B, Saladi S, Grabitz P, Bannach-Brown A, Schulz R, McCann S, Bernard R,  
34 Bandrowski A. Automated screening of COVID-19 preprints: can we help authors to improve  
35 transparency and reproducibility? *Nat Med*. 2021;27(1):6–7. doi:10.1038/s41591-020-01203-7  
36 Cited in: PubMed; PMID 33432174.  
37  
38 91. European Commission. Open science monitor [Internet]. 2018 [updated 2018 Nov 7; cited  
39 2021 Apr 10]. Available from: [https://ec.europa.eu/info/research-and-innovation/strategy/goals-](https://ec.europa.eu/info/research-and-innovation/strategy/goals-research-and-innovation-policy/open-science/open-science-monitor_en)  
40 [research-and-innovation-policy/open-science/open-science-monitor\\_en](https://ec.europa.eu/info/research-and-innovation/strategy/goals-research-and-innovation-policy/open-science/open-science-monitor_en)  
41  
42 92. EU Trials Tracker. EU Trials Tracker — Who's not sharing clinical trial results? [Internet]: Evidence-  
43 Based Medicine Data Lab; University of Oxford. 2021 [updated 2021 Apr 12; cited 2021 Apr 12].  
44 Available from: <https://eu.trialstracker.net/>  
45  
46 93. Altman DG. WEBINAR: Doug Altman – CONSORT Statement guidance for reporting randomised  
47 trials | The EQUATOR Network [Internet]: EQUATOR. 2013 [updated 2021 Apr 8; cited 2021 Apr 8].  
48 Available from: [https://www.equator-network.org/2013/06/24/webinar-doug-altman-consort-](https://www.equator-network.org/2013/06/24/webinar-doug-altman-consort-statement-guidance-for-reporting-randomised-trials/)  
49 [statement-guidance-for-reporting-randomised-trials/](https://www.equator-network.org/2013/06/24/webinar-doug-altman-consort-statement-guidance-for-reporting-randomised-trials/)  
50  
51 94. Society for Transparency, Openness, and Replication in Kinesiology. Stork - Resources [Internet].  
52 2021 [updated 2021 Apr 8; cited 2021 Apr 8]. Available from:  
53 <https://storkinesiology.org/resources/>  
54  
55 95. Hoffmann TC, Eructi C, Glasziou PP. Poor description of non-pharmacological interventions:  
56 analysis of consecutive sample of randomised trials. *BMJ*. 2013;347:f3755. doi:10.1136/bmj.f3755  
57 Cited in: PubMed; PMID 24021722.  
58  
59  
60

1  
2  
3 [dataset] 96. Schulz R, Langen G, Prill R, Weissgerber T. Adherence to reporting standards and  
4 transparent research practices in orthopedics and sports medicine literature; 2020.  
5  
6  
7  
8  
9  
10  
11  
12  
13  
14  
15  
16  
17  
18  
19  
20  
21  
22  
23  
24  
25  
26  
27  
28  
29  
30  
31  
32  
33  
34  
35  
36  
37  
38  
39  
40  
41  
42  
43  
44  
45  
46  
47  
48  
49  
50  
51  
52  
53  
54  
55  
56  
57  
58  
59  
60

For peer review only



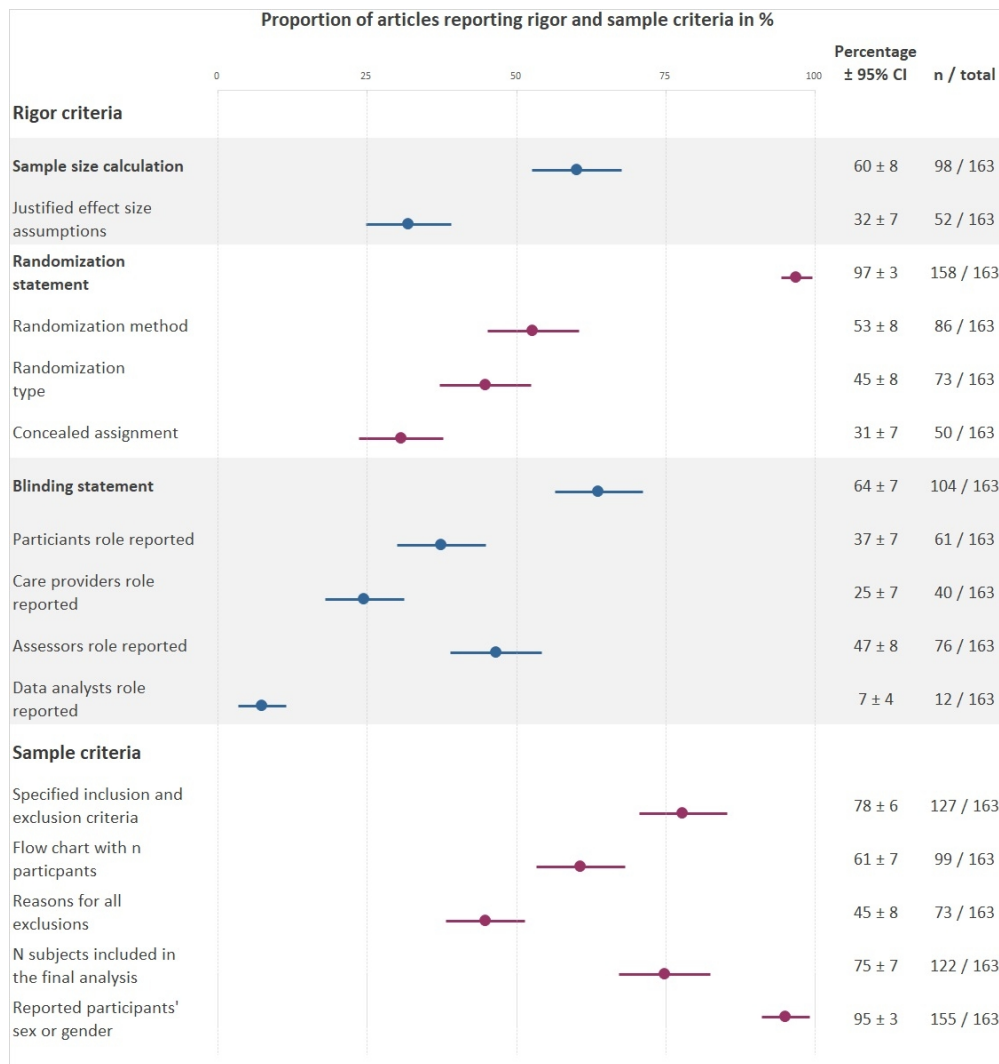

Figure 1 Reporting prevalence for rigor and sample criteria. This plot displays the percentage of trials that addressed each criteria. For information on the actual randomization or blinding status, please refer to the text. The different colored data points are for better visual differentiation of each subcategory. Created by the authors.

298x315mm (96 x 96 DPI)

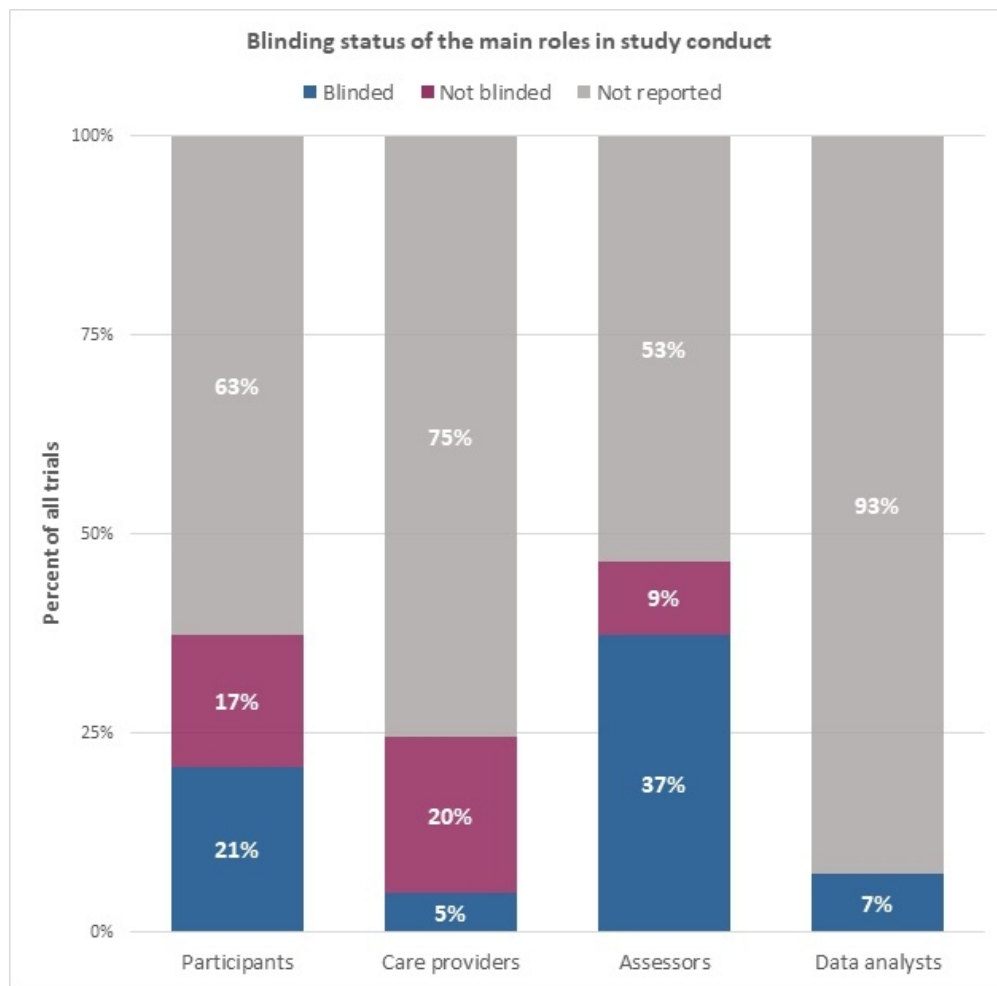

Figure 2 The blinding status across the main different stakeholder groups across all clinical trials (n=163).  
Created by the authors.

110x108mm (144 x 144 DPI)

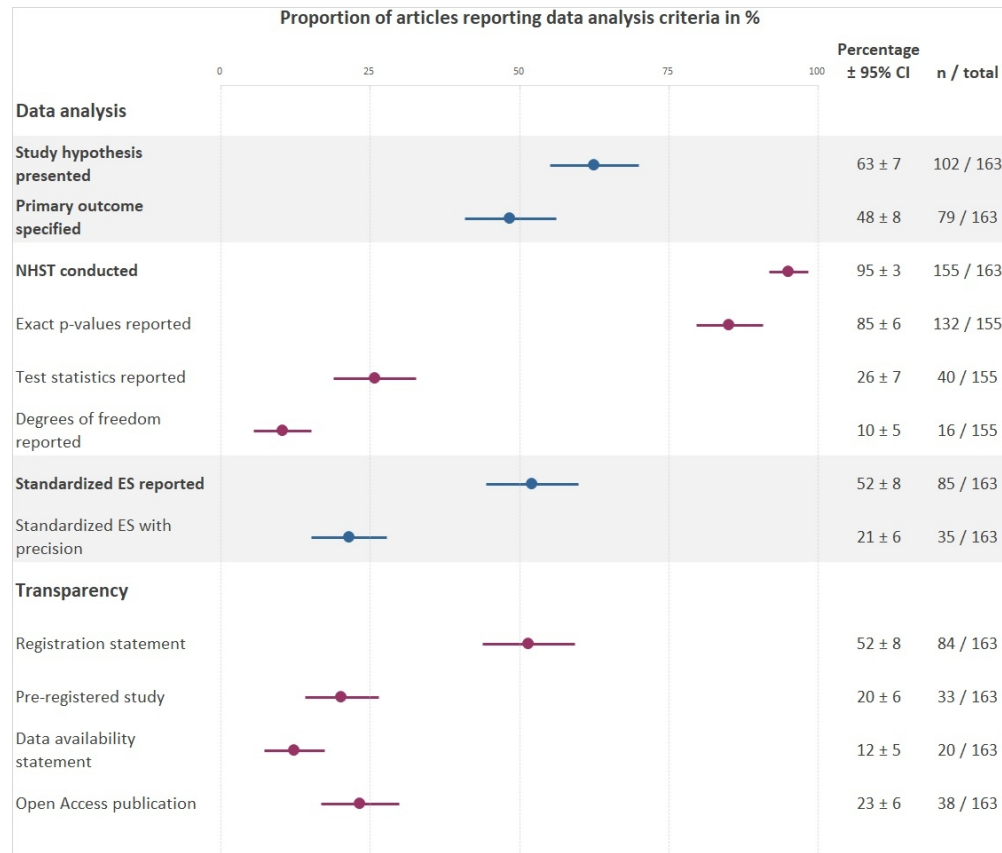

Figure 3 Reporting prevalence for data analysis and transparency criteria. This plot displays the percentage of trials that addressed each criteria. Abbreviations: NHST, null hypothesis statistical testing; ES, effect size. Created by the authors.

298x252mm (96 x 96 DPI)

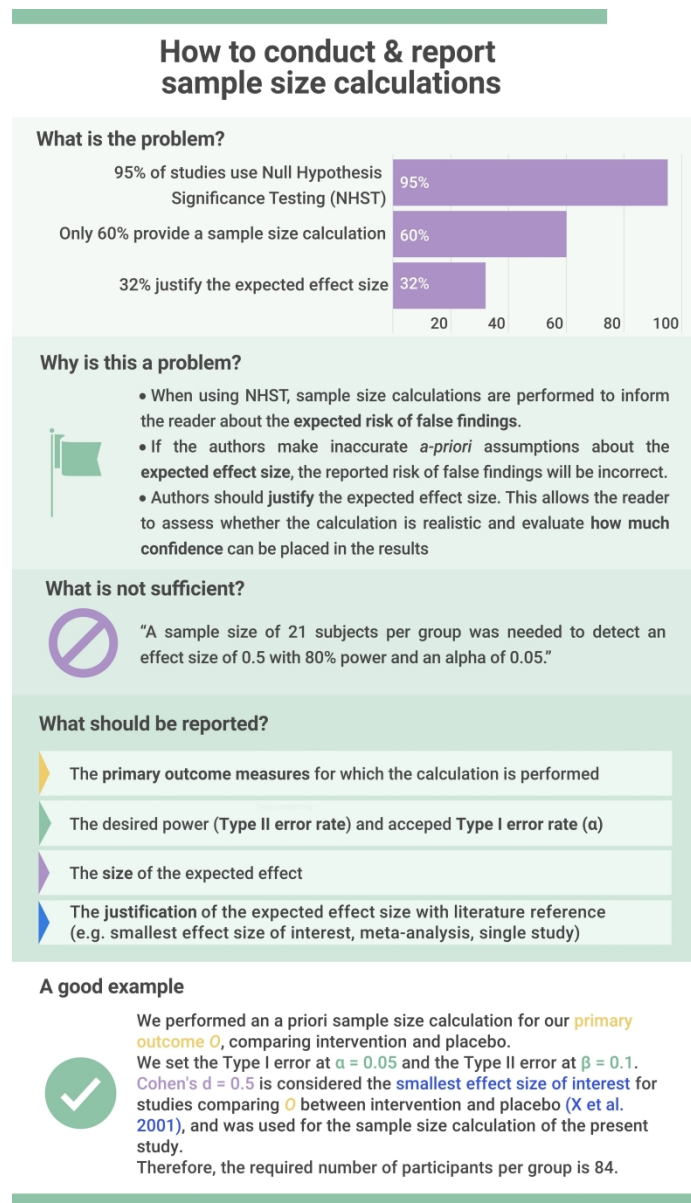

Figure 4 A priori sample size calculations are essential for generating meaningful results with clinical trials. Created by the authors. This infographic focusses on key elements a priori sample size calculations that should be reported in clinical trial publication. However, it is important to note that each element should be justified individually including the thresholds for type 1 and type 2 errors, and the expected effect size. Daniel Lakens free article on sample size justification provides an excellent overview of aspects to consider when planning empirical research studies (62).

770x1332mm (96 x 96 DPI)

# The devil is in the details: Reporting and transparent research practices in orthopedic and sports medicine clinical trials

## Supplemental material

### Methods

#### Sample Size Calculation

This exploratory study does not require formal sample size calculations. However, conventionally, sample sizes between 30 and 150 subjects or items are recommended for exploratory study designs with non-probability sampling (1).

For information purposes only, a precision-based sample size estimation was performed to obtain rough estimates of relevant sample sizes. We assumed that three-quarters of articles would report the criteria (0.75), the margin of error would be 0.05, and a level of confidence of 0.8. These assumptions result in a calculated sample size of 124 articles. The estimated proportion was based on previous investigations in general medical journals (2–5). While the reporting prevalence varied substantially depending on the criterion, we chose an estimated reporting proportion of 75%, as the proportion of trials reporting information for risk of bias assessment was between 60 and 80% for most rigor criteria, and the latest large analysis of reporting in RCTs suggested that reporting was improving over time (5).

As the values chosen were estimates, additional sample size calculations were performed by varying the basic assumptions. The first alternative was to reduce the expected proportion from 75% to 66% (resulting in  $n=148$ ) or 50% (resulting in  $n=165$ ). Increasing the level of confidence from 0.8 to 0.9, with an expected proportion of 75%, would require an  $n$  of 203. After reviewing these estimates, the target sample size was set at

1  
2  
3 approximately n=175 clinical trials. Sample size calculations were performed with the web-  
4 based application Statulator (RRID:SCR\_021003; 6).  
5

6  
7 We searched for clinical trials published in August 2020; then went backward in time  
8  
9 adding additional months until the target sample size was reached. The final search  
10  
11 dates included clinical trials published between January and August 2020.  
12  
13

## 14 **Sample selection and screening process**

15  
16  
17  
18 Journals were selected on basis of the Scimago journal ranking list from 2019 in the  
19  
20 subject category orthopedics and sports medicine as determined by 2019 by Scimago  
21  
22 Journal Rank indicator (7). The Scimago journal-ranking list was sorted by the Scientific  
23  
24 Journal Ranking. The top 25% of journals (n=65) were then entered into the PubMed  
25  
26 search with filters for article type (clinical trial) and publication date (2019/12:2020/08).  
27  
28 The search was run on September 16, 2020.  
29  
30

31  
32  
33 The search string was:  
34

```
35 (((((((((((((((((((((((((((((((((((((((((((((((((((((((((((("British journal of sports medicine"[Journal])
36 OR ("Sports Med"[jour])) OR ("The American journal of sports medicine"[Journal])) OR ("The
37 bone & joint journal"[Journal])) OR ("The Journal of arthroplasty"[Journal])) OR ("The Journal of
38 bone and joint surgery. American volume"[Journal])) OR ("Arthroscopy : the journal of
39 arthroscopic & related surgery : official publication of the Arthroscopy Association of North
40 America and the International Arthroscopy Association"[Journal])) OR ("Journal of bone and
41 mineral research : the official journal of the American Society for Bone and Mineral
42 Research"[Journal])) OR ("J Cachexia Sarcopenia Muscle"[jour])) OR ("Journal of shoulder and
43 elbow surgery"[Journal])) OR ("Medicine and science in sports and exercise"[Journal])) OR
44 ("Osteoarthritis and cartilage"[Journal])) OR ("International journal of sports physiology and
45
46
47
48
49
50
51
52
53
54
55
56
```

1  
2  
3 performance"[Journal])) OR ("Knee surgery, sports traumatology, arthroscopy : official journal  
4 of the ESSKA"[Journal])) OR ("Skeletal muscle"[Journal])) OR ("Exercise and sport sciences  
5 reviews"[Journal])) OR ("Acta orthopaedica"[Journal])) OR ("Spine"[Journal])) OR  
6 ("International orthopaedics"[Journal])) OR ("Clinical orthopaedics and related  
7 research"[Journal])) OR ("Foot & ankle international"[Journal])) OR ("Therapeutic advances in  
8 musculoskeletal disease"[Journal])) OR ("Journal of science and medicine in sport"[Journal]))  
9 OR ("Orthopaedic journal of sports medicine"[Journal])) OR ("European spine journal : official  
10 publication of the European Spine Society, the European Spinal Deformity Society, and the  
11 European Section of the Cervical Spine Research Society"[Journal])) OR ("Scandinavian  
12 journal of medicine & science in sports"[Journal])) OR ("Bone & joint research"[Journal])) OR  
13 ("Current reviews in musculoskeletal medicine"[Journal])) OR ("Global spine journal"[Journal]))  
14 OR ("The Journal of the American Academy of Orthopaedic Surgeons"[Journal])) OR ("The  
15 Journal of hand surgery"[Journal])) OR ("Journal of teaching in physical education :  
16 JTPE"[Journal])) OR ("International journal of sport nutrition and exercise  
17 metabolism"[Journal])) OR ("Journal of strength and conditioning research"[Journal])) OR  
18 ("Journal of sports sciences"[Journal])) OR ("Journal of pediatric orthopedics"[Journal])) OR  
19 ("Annals of physical and rehabilitation medicine"[Journal])) OR ("Sports health"[Journal])) OR  
20 ("Archives of orthopaedic and trauma surgery"[Journal])) OR ("Journal of sport and health  
21 science"[Journal]) ) OR ("European journal of applied physiology"[Journal])) OR ("European  
22 journal of sport science"[Journal])) OR ("The spine journal : official journal of the North American  
23 Spine Society"[Journal])) OR ("International journal of sports medicine"[Journal])) OR ("The  
24 Knee"[Journal])) OR ("The Orthopedic clinics of North America"[Journal])) OR ("Physical  
25 education and sport pedagogy"[Journal])) OR ("Journal of athletic training"[Journal])) OR  
26 ("Calcified tissue international"[Journal]) ) OR ("Sport, education and society"[Journal])) OR  
27 ("Journal of orthopaedics and traumatology : official journal of the Italian Society of  
28 Orthopaedics and Traumatology"[Journal])) OR ("Journal of orthopaedic trauma"[Journal])) OR  
29  
30  
31  
32  
33  
34  
35  
36  
37  
38  
39  
40  
41  
42  
43  
44  
45  
46  
47  
48  
49  
50  
51  
52  
53  
54  
55  
56  
57  
58  
59  
60

1  
2  
3 ("Journal of orthopaedic research : official publication of the Orthopaedic Research  
4 Society"[Journal])) OR ("Journal of biomechanics"[Journal])) OR ("Clinical journal of sport  
5 medicine : official journal of the Canadian Academy of Sport Medicine"[Journal])) OR ("EFORT  
6 open reviews"[Journal]) ) OR ("Orthopaedics & traumatology, surgery & research :  
7 OTSR"[Journal])) OR ("Sports medicine - open"[Journal])) OR ("Clinics in sports  
8 medicine"[Journal])) OR ("European physical education review"[Journal])) OR ("The journal of  
9 knee surgery"[Journal])) OR ("Injury"[Journal])) OR ("Gait & posture"[Journal])) OR ("Research  
10 in sports medicine (Print)"[Journal])) AND ((clinicaltrial[Filter]) AND (2019/12:2020/08[pdat]))  
11  
12  
13  
14  
15  
16  
17  
18  
19  
20  
21

## 22 Data Abstraction

23  
24 All reviewers completed training on a minimum of 10 articles to ensure that responses  
25 were consistent before starting data abstraction. Data from all included studies were  
26 extracted using preformatted Excel spreadsheets.  
27  
28  
29  
30  
31

## 32 Results

33  
34 The search retrieved 175 articles from 27 journals Table S1. All articles were then  
35 uploaded into Rayyan (RRID:SCR\_017584; 8) for title and abstract screening. Two  
36 reviewers (RS, GL) performed title and abstract screening to exclude articles that were  
37 obviously not clinical trials, as defined by the ICMJE. The ICMJE defines a clinical trial as  
38 any research project that prospectively assigns people or a group of people to an  
39 intervention, with or without concurrent comparison or control groups, to study the  
40 relationship between a health-related intervention and a health outcome (9). After the title  
41 and abstract screening, two independent abstractors (RS, GL, RP) reviewed each full-  
42 length, original research article and any available supplemental files. All papers meeting  
43  
44  
45  
46  
47  
48  
49  
50  
51  
52  
53  
54  
55  
56  
57  
58  
59  
60



the ICMJE definition of a clinical trial were included. Disagreements were resolved by consensus.

Table S1 Identified top 25% journals that published clinical trials in the time period of interest, the number of identified published articles, and the number of included articles

| <b>Title</b>                                               | <b>Number of articles identified in search</b> | <b>Number of included articles</b> |
|------------------------------------------------------------|------------------------------------------------|------------------------------------|
| Medicine and Science in Sports and Exercise                | 22                                             | 21                                 |
| Journal of Strength and Conditioning Research              | 22                                             | 21                                 |
| Bone and Joint Journal                                     | 21                                             | 18                                 |
| Journal of Sports Sciences                                 | 13                                             | 12                                 |
| British Journal of Sports Medicine                         | 12                                             | 12                                 |
| Knee Surgery, Sports Traumatology, Arthroscopy             | 9                                              | 6                                  |
| Journal of Bone and Joint Surgery - Series A               | 8                                              | 5                                  |
| Acta Orthopaedica                                          | 8                                              | 8                                  |
| Scandinavian Journal of Medicine and Science in Sports     | 8                                              | 8                                  |
| American Journal of Sports Medicine                        | 7                                              | 7                                  |
| Journal of Shoulder and Elbow Surgery                      | 7                                              | 7                                  |
| Spine                                                      | 6                                              | 6                                  |
| Journal of Science and Medicine in Sport                   | 6                                              | 6                                  |
| International Journal of Sports Medicine                   | 6                                              | 6                                  |
| Sports Health                                              | 5                                              | 5                                  |
| International Journal of Sports Physiology and Performance | 4                                              | 4                                  |
| European Journal of Sport Science                          | 3                                              | 3                                  |
| Journal of Sport and Health Science                        | 2                                              | 2                                  |
| Clinical Orthopaedics and Related Research                 | 1                                              | 1                                  |
| Foot and Ankle International                               | 1                                              | 1                                  |
| Archives of Orthopaedic and Trauma Surgery                 | 1                                              | 1                                  |
| Spine Journal                                              | 1                                              | 1                                  |
| Knee                                                       | 1                                              | 1                                  |
| Journal of Athletic Training                               | 1                                              | 1                                  |
|                                                            | <b>175</b>                                     | <b>163</b>                         |

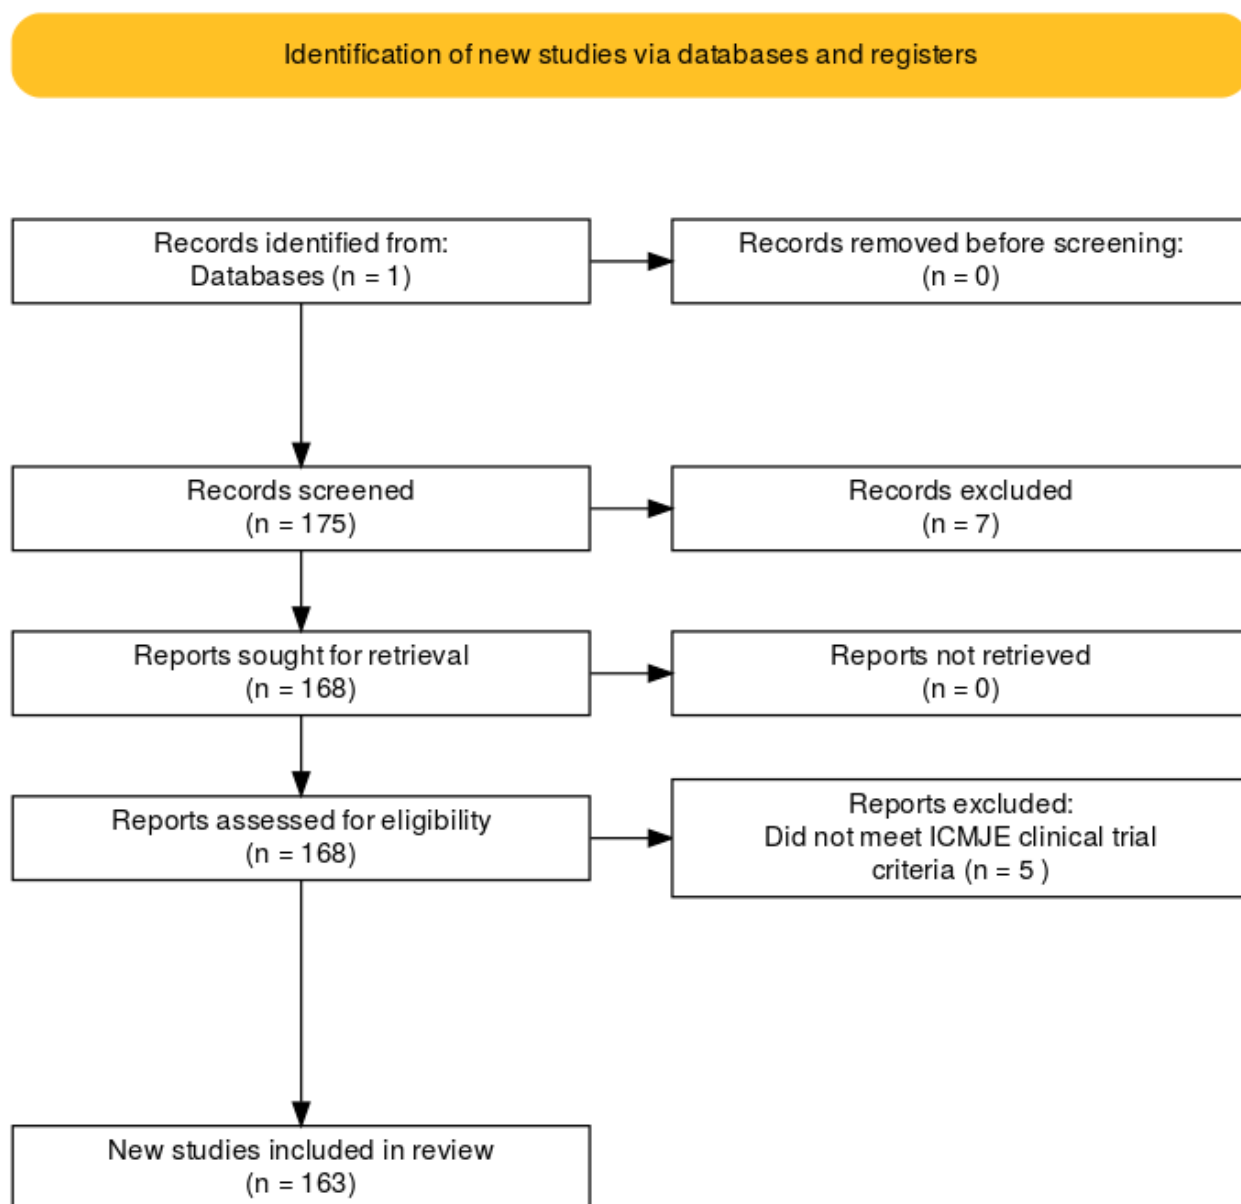

41 **Figure S1** Flow chart of the study selection process. Seven studies were excluded during the  
42 abstract screening because they did not meet the ICMJE clinical trial criteria (n=6) or were the  
43 wrong publication type (extended conference abstract; n=1). The flow diagram was created with  
44 the ShinyApp for PRISMA 2020 (RRID: 10,11).  
45  
46  
47  
48  
49  
50  
51  
52  
53  
54  
55  
56  
57  
58  
59  
60

## References

1. Daniel J, editor. *Sampling essentials: Practical guidelines for making sampling choices*. Los Angeles, Calif.: SAGE Publ; 2012. 291 p. eng.
2. Ghimire S, Kyung E, Kang W, Kim E. Assessment of adherence to the CONSORT statement for quality of reports on randomized controlled trial abstracts from four high-impact general medical journals. *Trials*. 2012;1377. doi:10.1186/1745-6215-13-77 Cited in: PubMed; PMID 22676267.
3. Turner L, Shamseer L, Altman DG, Schulz KF, Moher D. Does use of the CONSORT Statement impact the completeness of reporting of randomised controlled trials published in medical journals? A Cochrane review. *Syst Rev*. 2012;160. doi:10.1186/2046-4053-1-60 Cited in: PubMed; PMID 23194585.
4. Chess LE, Gagnier J. Risk of bias of randomized controlled trials published in orthopaedic journals. *BMC Med Res Methodol*. 2013;1376. doi:10.1186/1471-2288-13-76 Cited in: PubMed; PMID 23758875.
5. Dechartres A, Trinquart L, Atal I, Moher D, Dickersin K, Boutron I, Perrodeau E, Altman DG, Ravaut P. Evolution of poor reporting and inadequate methods over time in 20 920 randomised controlled trials included in Cochrane reviews: research on research study. *BMJ*. 2017;357j2490. doi:10.1136/bmj.j2490 Cited in: PubMed; PMID 28596181.
6. Khatkar M, Dhand N. *Statulator*; 2014.
7. SCImago (nd). SJR — SCImago Journal & Country Rank [Portal] [Internet]. 2020 [cited 2021 Feb 22]. Available from: <https://www.scimagojr.com/journalrank.php?category=2732>
8. Ouzzani M, Hammady H, Fedorowicz Z, Elmagarmid A. Rayyan-a web and mobile app for systematic reviews. *Syst Rev*. 2016;5(1):210. doi:10.1186/s13643-016-0384-4 Cited in: PubMed; PMID 27919275.
9. ICMJE. Recommendations for the Conduct, Reporting, Editing and Publication of Scholarly Work in Medical Journals [Internet]. 2020 [cited 2020 Aug 4]. Available from: <http://www.ICMJE.org>.
10. Haddaway NR, McGuinness L. PRISMA2020: R package and ShinyApp for producing PRISMA 2020 compliant flow diagrams: Zenodo; 2020.
11. Page MJ, McKenzie JE, Bossuyt PM, Boutron I, Hoffmann TC, Mulrow CD, Shamseer L, Tetzlaff JM, Akl EA, Brennan SE, Chou R, Glanville J, Grimshaw JM, Hróbjartsson A, Lalu MM, Li T, Loder EW, Mayo-Wilson E, McDonald S, McGuinness LA, Stewart LA, Thomas J, Tricco AC, Welch VA, Whiting P, Moher D. The PRISMA 2020 statement: an updated guideline for reporting systematic reviews. *BMJ*. 2021;372n71. doi:10.1136/bmj.n71 Cited in: PubMed; PMID 33782057.

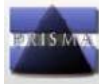

## PRISMA 2020 Checklist

*NOTE: This is a meta-research study. Despite some methodological similarities between Systematic Reviews and our meta-research study, some elements of PRISMA 2020 do not apply.*

| Section and Topic             | Item # | Checklist item                                                                                                                                                                                                                                                                                       | Location where item is reported                                                                        |
|-------------------------------|--------|------------------------------------------------------------------------------------------------------------------------------------------------------------------------------------------------------------------------------------------------------------------------------------------------------|--------------------------------------------------------------------------------------------------------|
| <b>TITLE</b>                  |        |                                                                                                                                                                                                                                                                                                      |                                                                                                        |
| Title                         | 1      | Identify the report as a systematic review.                                                                                                                                                                                                                                                          | NA, meta-research study, not systematic review, study type is given in the title (meta-research study) |
| <b>ABSTRACT</b>               |        |                                                                                                                                                                                                                                                                                                      |                                                                                                        |
| Abstract                      | 2      | See the PRISMA 2020 for Abstracts checklist.                                                                                                                                                                                                                                                         |                                                                                                        |
| <b>INTRODUCTION</b>           |        |                                                                                                                                                                                                                                                                                                      |                                                                                                        |
| Rationale                     | 3      | Describe the rationale for the review in the context of existing knowledge.                                                                                                                                                                                                                          | p. 2-3                                                                                                 |
| Objectives                    | 4      | Provide an explicit statement of the objective(s) or question(s) the review addresses.                                                                                                                                                                                                               | p. 3                                                                                                   |
| <b>METHODS</b>                |        |                                                                                                                                                                                                                                                                                                      |                                                                                                        |
| Eligibility criteria          | 5      | Specify the inclusion and exclusion criteria for the review and how studies were grouped for the syntheses.                                                                                                                                                                                          | p. 5-6                                                                                                 |
| Information sources           | 6      | Specify all databases, registers, websites, organisations, reference lists and other sources searched or consulted to identify studies. Specify the date when each source was last searched or consulted.                                                                                            | p. 5                                                                                                   |
| Search strategy               | 7      | Present the full search strategies for all databases, registers and websites, including any filters and limits used.                                                                                                                                                                                 | p. 5 + supplements                                                                                     |
| Selection process             | 8      | Specify the methods used to decide whether a study met the inclusion criteria of the review, including how many reviewers screened each record and each report retrieved, whether they worked independently, and if applicable, details of automation tools used in the process.                     | p. 5-6                                                                                                 |
| Data collection process       | 9      | Specify the methods used to collect data from reports, including how many reviewers collected data from each report, whether they worked independently, any processes for obtaining or confirming data from study investigators, and if applicable, details of automation tools used in the process. | p. 6                                                                                                   |
| Data items                    | 10a    | List and define all outcomes for which data were sought. Specify whether all results that were compatible with each outcome domain in each study were sought (e.g. for all measures, time points, analyses), and if not, the methods used to decide which results to collect.                        | p. 8-9                                                                                                 |
|                               | 10b    | List and define all other variables for which data were sought (e.g. participant and intervention characteristics, funding sources). Describe any assumptions made about any missing or unclear information.                                                                                         | NA                                                                                                     |
| Study risk of bias assessment | 11     | Specify the methods used to assess risk of bias in the included studies, including details of the tool(s) used, how many reviewers assessed each study and whether they worked independently, and if applicable, details of automation tools used in the process.                                    | NA, meta-research study                                                                                |
| Effect measures               | 12     | Specify for each outcome the effect measure(s) (e.g. risk ratio, mean difference) used in the synthesis or presentation of results.                                                                                                                                                                  | p. 7                                                                                                   |
| Synthesis methods             | 13a    | Describe the processes used to decide which studies were eligible for each synthesis (e.g. tabulating the study intervention characteristics and comparing against the planned groups for each synthesis (item #5)).                                                                                 | NA, not a systematic review                                                                            |
|                               | 13b    | Describe any methods required to prepare the data for presentation or synthesis, such as handling of missing summary statistics, or data conversions.                                                                                                                                                |                                                                                                        |

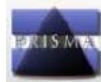

## PRISMA 2020 Checklist

*NOTE: This is a meta-research study. Despite some methodological similarities between Systematic Reviews and our meta-research study, some elements of PRISMA 2020 do not apply.*

| Section and Topic             | Item # | Checklist item                                                                                                                                                                                                                                                                       | Location where item is reported |
|-------------------------------|--------|--------------------------------------------------------------------------------------------------------------------------------------------------------------------------------------------------------------------------------------------------------------------------------------|---------------------------------|
|                               | 13c    | Describe any methods used to tabulate or visually display results of individual studies and syntheses.                                                                                                                                                                               |                                 |
|                               | 13d    | Describe any methods used to synthesize results and provide a rationale for the choice(s). If meta-analysis was performed, describe the model(s), method(s) to identify the presence and extent of statistical heterogeneity, and software package(s) used.                          |                                 |
|                               | 13e    | Describe any methods used to explore possible causes of heterogeneity among study results (e.g. subgroup analysis, meta-regression).                                                                                                                                                 |                                 |
|                               | 13f    | Describe any sensitivity analyses conducted to assess robustness of the synthesized results.                                                                                                                                                                                         |                                 |
| Reporting bias assessment     | 14     | Describe any methods used to assess risk of bias due to missing results in a synthesis (arising from reporting biases).                                                                                                                                                              |                                 |
| Certainty assessment          | 15     | Describe any methods used to assess certainty (or confidence) in the body of evidence for an outcome.                                                                                                                                                                                |                                 |
| <b>RESULTS</b>                |        |                                                                                                                                                                                                                                                                                      |                                 |
| Study selection               | 16a    | Describe the results of the search and selection process, from the number of records identified in the search to the number of studies included in the review, ideally using a flow diagram.                                                                                         | p. 10, Figure S1, Table S1      |
|                               | 16b    | Cite studies that might appear to meet the inclusion criteria, but which were excluded, and explain why they were excluded.                                                                                                                                                          | NA                              |
| Study characteristics         | 17     | Cite each included study and present its characteristics.                                                                                                                                                                                                                            | NA, not a systematic review     |
| Risk of bias in studies       | 18     | Present assessments of risk of bias for each included study.                                                                                                                                                                                                                         |                                 |
| Results of individual studies | 19     | For all outcomes, present, for each study: (a) summary statistics for each group (where appropriate) and (b) an effect estimate and its precision (e.g. confidence/credible interval), ideally using structured tables or plots.                                                     |                                 |
| Results of syntheses          | 20a    | For each synthesis, briefly summarise the characteristics and risk of bias among contributing studies.                                                                                                                                                                               |                                 |
|                               | 20b    | Present results of all statistical syntheses conducted. If meta-analysis was done, present for each the summary estimate and its precision (e.g. confidence/credible interval) and measures of statistical heterogeneity. If comparing groups, describe the direction of the effect. | p. 11-15, p. 16                 |
|                               | 20c    | Present results of all investigations of possible causes of heterogeneity among study results.                                                                                                                                                                                       |                                 |
|                               | 20d    | Present results of all sensitivity analyses conducted to assess the robustness of the synthesized results.                                                                                                                                                                           | NA, not a systematic review     |
| Reporting biases              | 21     | Present assessments of risk of bias due to missing results (arising from reporting biases) for each synthesis assessed.                                                                                                                                                              |                                 |
| Certainty of evidence         | 22     | Present assessments of certainty (or confidence) in the body of evidence for each outcome assessed.                                                                                                                                                                                  |                                 |
| <b>DISCUSSION</b>             |        |                                                                                                                                                                                                                                                                                      |                                 |
| Discussion                    | 23a    | Provide a general interpretation of the results in the context of other evidence.                                                                                                                                                                                                    | p. 17-20                        |
|                               | 23b    | Discuss any limitations of the evidence included in the review.                                                                                                                                                                                                                      | p. 22-23                        |
|                               | 23c    | Discuss any limitations of the review processes used.                                                                                                                                                                                                                                |                                 |

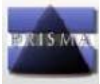

## PRISMA 2020 Checklist

*NOTE: This is a meta-research study. Despite some methodological similarities between Systematic Reviews and our meta-research study, some elements of PRISMA 2020 do not apply.*

| Section and Topic                              | Item # | Checklist item                                                                                                                                                                                                                             | Location where item is reported |
|------------------------------------------------|--------|--------------------------------------------------------------------------------------------------------------------------------------------------------------------------------------------------------------------------------------------|---------------------------------|
|                                                | 23d    | Discuss implications of the results for practice, policy, and future research.                                                                                                                                                             | p. 21-22                        |
| <b>OTHER INFORMATION</b>                       |        |                                                                                                                                                                                                                                            |                                 |
| Registration and protocol                      | 24a    | Provide registration information for the review, including register name and registration number, or state that the review was not registered.                                                                                             | p. 5                            |
|                                                | 24b    | Indicate where the review protocol can be accessed, or state that a protocol was not prepared.                                                                                                                                             | p. 5                            |
|                                                | 24c    | Describe and explain any amendments to information provided at registration or in the protocol.                                                                                                                                            | p. 6                            |
| Support                                        | 25     | Describe sources of financial or non-financial support for the review, and the role of the funders or sponsors in the review.                                                                                                              | p. 25                           |
| Competing interests                            | 26     | Declare any competing interests of review authors.                                                                                                                                                                                         | p. 25                           |
| Availability of data, code and other materials | 27     | Report which of the following are publicly available and where they can be found: template data collection forms; data extracted from included studies; data used for all analyses; analytic code; any other materials used in the review. | p. 24                           |

From: Page MJ, McKenzie JE, Bossuyt PM, Boutron I, Hoffmann TC, Mulrow CD, et al. The PRISMA 2020 statement: an updated guideline for reporting systematic reviews. *BMJ* 2021;372:n71. doi: 10.1136/bmj.n71  
 For more information, visit: <http://www.prisma-statement.org/>

# BMJ Open

## Reporting and transparent research practices in sports medicine and orthopedic clinical trials: A meta-research study

|                                 |                                                                                                                                                                                                                                                                                                                                                                                                                                                                                                                              |
|---------------------------------|------------------------------------------------------------------------------------------------------------------------------------------------------------------------------------------------------------------------------------------------------------------------------------------------------------------------------------------------------------------------------------------------------------------------------------------------------------------------------------------------------------------------------|
| Journal:                        | <i>BMJ Open</i>                                                                                                                                                                                                                                                                                                                                                                                                                                                                                                              |
| Manuscript ID                   | bmjopen-2021-059347.R2                                                                                                                                                                                                                                                                                                                                                                                                                                                                                                       |
| Article Type:                   | Original research                                                                                                                                                                                                                                                                                                                                                                                                                                                                                                            |
| Date Submitted by the Author:   | 08-Jul-2022                                                                                                                                                                                                                                                                                                                                                                                                                                                                                                                  |
| Complete List of Authors:       | Schulz, Robert; Berlin Institute of Health at Charité, BIH QUEST Center for Responsible Research; University of Potsdam, Department of Sport and Health Sciences<br>Langen, Georg; Institute for Applied Training Science<br>Prill, Robert; Brandenburg Medical School Theodor Fontane, Center of Orthopaedics and Traumatology<br>Cassel , Michael; University of Potsdam, Department of Sport and Health Sciences<br>Weissgerber, Tracey; Berlin Institute of Health at Charité, BIH QUEST Center for Responsible Research |
| <b>Primary Subject Heading</b>: | Research methods                                                                                                                                                                                                                                                                                                                                                                                                                                                                                                             |
| Secondary Subject Heading:      | Medical education and training, Medical publishing and peer review, Rehabilitation medicine, Research methods, Sports and exercise medicine                                                                                                                                                                                                                                                                                                                                                                                  |
| Keywords:                       | Clinical trials < THERAPEUTICS, STATISTICS & RESEARCH METHODS, SPORTS MEDICINE, REHABILITATION MEDICINE, ORTHOPAEDIC & TRAUMA SURGERY, MEDICAL EDUCATION & TRAINING                                                                                                                                                                                                                                                                                                                                                          |
|                                 |                                                                                                                                                                                                                                                                                                                                                                                                                                                                                                                              |

SCHOLARONE™  
Manuscripts



I, the Submitting Author has the right to grant and does grant on behalf of all authors of the Work (as defined in the below author licence), an exclusive licence and/or a non-exclusive licence for contributions from authors who are: i) UK Crown employees; ii) where BMJ has agreed a CC-BY licence shall apply, and/or iii) in accordance with the terms applicable for US Federal Government officers or employees acting as part of their official duties; on a worldwide, perpetual, irrevocable, royalty-free basis to BMJ Publishing Group Ltd ("BMJ") its licensees and where the relevant Journal is co-owned by BMJ to the co-owners of the Journal, to publish the Work in this journal and any other BMJ products and to exploit all rights, as set out in our [licence](#).

The Submitting Author accepts and understands that any supply made under these terms is made by BMJ to the Submitting Author unless you are acting as an employee on behalf of your employer or a postgraduate student of an affiliated institution which is paying any applicable article publishing charge ("APC") for Open Access articles. Where the Submitting Author wishes to make the Work available on an Open Access basis (and intends to pay the relevant APC), the terms of reuse of such Open Access shall be governed by a Creative Commons licence – details of these licences and which [Creative Commons](#) licence will apply to this Work are set out in our licence referred to above.

Other than as permitted in any relevant BMJ Author's Self Archiving Policies, I confirm this Work has not been accepted for publication elsewhere, is not being considered for publication elsewhere and does not duplicate material already published. I confirm all authors consent to publication of this Work and authorise the granting of this licence.



# Reporting and transparent research practices in sports medicine and orthopedic clinical trials: A meta-research study

Robert Schulz<sup>1,2</sup>, Georg Langen<sup>3</sup>, Robert Prill<sup>4</sup>, Michael Cassel<sup>2</sup>, Tracey Weissgerber<sup>1</sup>

<sup>1</sup> Berlin Institute of Health at Charité – Universitätsmedizin Berlin, QUEST Center for Responsible Research, Berlin, Germany

<sup>2</sup> University of Potsdam, Department of Sport and Health Sciences, Potsdam, Germany

<sup>3</sup> Institute for Applied Training Science, Leipzig, Germany

<sup>4</sup> Brandenburg Medical School Theodor Fontane, Department of Orthopedics and Traumatology, Brandenburg, Germany

## Corresponding author:

Tracey Weissgerber, PhD

Berlin Institute of Health at Charité - Universitätsmedizin Berlin

BIH QUEST Center for Responsible Research

Anna-Louisa-Karsch-Str. 2

10178 Berlin

[tracey.weissgerber@bih-charite.de](mailto:tracey.weissgerber@bih-charite.de)

**Word count:** 4459

## Abstract

**Objectives:** Transparent reporting of clinical trials is essential to assess the risk of bias and translate research findings into clinical practice. While existing studies have shown that deficiencies are common, detailed empirical and field-specific data is scarce. Therefore, this study aimed to examine current clinical trial reporting and transparent research practices in sports medicine and orthopedics.

**Setting:** Exploratory meta-research study on reporting quality and transparent research practices in orthopedics and sports medicine clinical trials.

**Participants:** The sample included clinical trials published in the top 25% of sports medicine and orthopedics journals over nine months.

**Primary and secondary outcome measures:** Two independent reviewers assessed pre-registration, open data, and criteria related to scientific rigor, like randomization, blinding, and sample size calculation, as well as the study sample, and data analysis.

**Results:** The sample included 163 clinical trials from 27 journals. While the majority of trials mentioned rigor criteria, essential details were often missing. Sixty percent (confidence interval [CI] 53-68%) of trials reported sample size calculations, but only 32% (CI 25-39%) justified the expected effect size. Few trials indicated the blinding status of all main stakeholders (4%; CI 1-7%). Only 18% (CI 12-24%) included information on randomization type, method, and concealed allocation. Most trials reported participants' sex/gender (95%; CI 92-98%) and information on inclusion and exclusion criteria (78%; CI 72-84%). Only 20% (CI 14-26%) of trials were pre-registered. No trials deposited data in open repositories.

**Conclusions:** These results will aid the sports medicine and orthopedics community in developing tailored interventions to improve reporting. While authors typically mention blinding, randomization and other factors, essential details are often missing. Greater acceptance of open science

1  
2  
3 practices, like pre-registration and open data, is needed. As these practices have been widely  
4 encouraged, we discuss systemic interventions that may improve clinical trial reporting.  
5  
6  
7

8 **Trial registration:** <https://doi.org/10.17605/OSF.IO/9648H>  
9  
10  
11  
12  
13  
14  
15  
16  
17  
18  
19  
20  
21  
22  
23  
24  
25  
26  
27  
28  
29  
30  
31  
32  
33  
34  
35  
36  
37  
38  
39  
40  
41  
42  
43  
44  
45  
46  
47  
48  
49  
50  
51  
52  
53  
54  
55  
56  
57  
58  
59  
60

## Strengths and limitations of this study

- The present study provides an in-depth assessment of clinical trial reporting quality, and utilization of transparent research practices in a recent sample of published clinical trials on orthopaedics and sports medicine.
- A comprehensive set of outcome parameters was assessed, covering fundamental aspects like scientific rigor, the study sample, and data analysis but also the utilization of pre-registration and open science practices.
- All assessments were performed by two independent reviewers and disagreements were resolved by consensus.
- The cross-sectional design and exploratory nature of the present study cannot provide information about cause-effect relationships. The odds ratios calculated in the present study were exploratory post-hoc calculations.
- The sample consisted of the top 25% of sports medicine and orthopedics journals, hence our findings may not be generalizable to journals that are not indexed by PubMed, lower tier journals, or non-English journals.

## Introduction

The overarching goal of medical research is to improve healthcare for patients, which requires the biomedical community to translate study outcomes into clinical practice (1). Clinical trials are central to this process, as properly conducted trials reduce the risk of bias and increase the likelihood that results about new treatments will be trustworthy, reproducible and generalizable (2,3). Clinical trials must be properly designed, conducted, and reported (4) to facilitate translation. Poorly designed and conducted trials may not be trustworthy or reproducible. This undermines public trust in biomedical research and raises concerns about whether the trial costs and patient risks were justified (5,6). Poor reporting makes it difficult to distinguish between trials with and without a high risk of bias.

To improve clinical trial reporting, the Consolidated Standards of Reporting Trials (CONSORT) guidelines (7,8) have been recommended by the ICMJE and widely disseminated by the EQUATOR network (9,10). While reporting has improved over time, major deficiencies that can impair translation are still common (11,12). These previous studies show that details needed to assess the risk of bias were missing from many published trials. More than half of all trials failed to address allocation concealment, and almost one third of studies did not address blinding of participants and personnel (12). Similarly, among randomized controlled trials published in the top five orthopedics journals, 60% failed to address the blinding status of the participants and 58% did not specify the number of participants included in the final analysis (13). However, these results are only available for a relative narrow set of criteria, and it is unclear whether whether these results are still applicable in recently published literature and for a broader range of journals.

Orthopedics and sports medicine researchers have joined efforts to improve study design and reporting. Newly formed societies (14,15) and editorial series (16) focus on improving research quality in sports medicine and orthopedics. These efforts are urgently needed, as only 1% of studies in high-impact orthopedic journals reported all ten criteria needed for risk of bias assessment (13). In 42% of papers, risk of bias could not be assessed due to incomplete reporting

1  
2  
3 (13). Incomplete reporting of exercise interventions (17) makes it impossible to implement  
4 interventions in clinical practice or to assess the appropriateness of the control intervention (18).  
5  
6 In sports medicine related fields, meta-researchers suggested that scientists may be using  
7 questionable research practices, such as those described in Table 1, after observing overinflated  
8 effect sizes (19) and an unreasonably high number of papers that support the study hypothesis  
9 (20). Comprehensive reporting may prevent biases like selective reporting, selection bias, attrition  
10 bias, outcome switching or wrong sample size bias, or make them easier to detect (see table 1 for  
11 selected definitions). However, earlier studies have shown that reporting deficiencies are still  
12 common in orthopedics (13) and general medical journals (12,21). Yet, available studies either  
13 lack currency, assessed a small number of criteria or are not specific to orthopedics and sports  
14 medicine. Comprehensive data on current reporting practices of orthopedics and sports medicine  
15 clinical trials are lacking.

16  
17  
18  
19  
20  
21  
22  
23  
24  
25  
26  
27  
28 Therefore, this meta-research study examined reporting among clinical trials published in the top  
29 25% of sports medicine and orthopedics journals as determined by Scientific Journal Rank. Our  
30 objective was to assess the prevalence of reporting for selected criteria, including pre-registration,  
31 open data and reporting of randomization, blinding, sample size calculations, data analysis and  
32 the flow of participants through the study. Meta-research data on clinical trial design, conduct and  
33 reporting will help researchers in sports medicine to implement targeted measures to improve trial  
34 design and reporting.

**Table 1** Terminology and concepts. Created by the authors.

|                                                   |                                                                                                                                                                                                                                                                                                                                                                                                                                                                 |
|---------------------------------------------------|-----------------------------------------------------------------------------------------------------------------------------------------------------------------------------------------------------------------------------------------------------------------------------------------------------------------------------------------------------------------------------------------------------------------------------------------------------------------|
| <b>Concept</b>                                    |                                                                                                                                                                                                                                                                                                                                                                                                                                                                 |
| <b>Questionable research practices</b>            | Questionable research practices are defined as “Design, analytic, or reporting practices that have been questioned because of the potential for the practice to be employed with the purpose of presenting biased evidence in favor of an assertion” (22)                                                                                                                                                                                                       |
| <b>Selective reporting/ cherry picking</b>        | The decision about whether to publish a study or parts of a study is based on the direction or statistical significance of the results (23,24). Pre-registration and Registered Reports may prevent selective reporting (25,26), which is also known as cherry picking.                                                                                                                                                                                         |
| <b>Publication bias</b>                           | The decision about whether to publish research findings depends on the strength and direction of the findings (27). The odds of publication are nearly four times higher among clinical trials with positive findings, compared to trials with negative or null findings (28).                                                                                                                                                                                  |
| <b>Outcome reporting bias</b>                     | Only particular outcome variables are included in publications and decisions about which variables to include are based on the statistical significance or direction of the results (23). Outcomes that are statistically significant have higher odds of being fully reported than non-significant outcomes (29,30).                                                                                                                                           |
| <b>Attrition bias</b>                             | Attrition refers to reductions in the number of participants throughout the study due to withdrawals, dropouts, or protocol deviations. Attrition bias occurs when there are systematic differences between people who leave the study and those who continue (31).<br><br>For example, a trial shows no differences between two treatments. In one group, however, half the participants dropped out because they underwent surgery due to worsening symptoms. |
| <b>Null hypothesis statistical testing (NHST)</b> | NHST is originally based on theories of Fischer and Neyman-Pearson. The null hypothesis is rejected or accepted depending on the position of an observed value in a test distribution. While NHST is standard practice in many fields, the International Committee of Medical Journal Editors warns against the inappropriate use and sole reliance on NHST due to several shortcomings of using this approach inappropriately (32).                            |
| <b>p-Hacking</b>                                  | Describes the process of analyzing the data in multiple ways until statistically significant results are found.                                                                                                                                                                                                                                                                                                                                                 |
| <b>HARKing</b>                                    | HARKing, or hypothesizing after results are known, is defined as presenting a post hoc hypothesis as if it were an a priori hypothesis (33).                                                                                                                                                                                                                                                                                                                    |

## Methods

### Protocol Pre-registration

The study was pre-registered on the Open Science Framework (RRID:SCR\_003238) at <https://doi.org/10.17605/OSF.IO/9648H> and all generated data was made openly available (34). Additional details regarding sample selection and screening, data abstraction, a sample size calculation, and data for each included study can be found in the supplemental materials.

### Sample selection and screening

We systematically examined clinical trials published in the top 25% of orthopedics and sports medicine journals over nine months. This sampling strategy provides an overview of practices in the field, particularly among journals whose articles receive the most attention. The large number of journals included ensures that findings are not driven by practices or policies of individual journals. Journals in the orthopedics and sports medicine category were selected based on the Scimago Journal Rank indicator (35) (supplementary methods). The top 25% of journals (n=65) were entered into the PubMed search with article type (clinical trial) and publication date (2019/12:2020/08) filters. The search was run on September 16, 2020. All articles (n=175 from 27 journals) were uploaded into Rayyan (RRID:SCR\_017584; 36) to screen titles and abstracts.

### Inclusion and exclusion criteria

Two reviewers (RS, GL) screened titles and abstracts to exclude articles that were obviously not clinical trials, as defined by the ICMJE. The ICMJE defines a clinical trial as any research project that “prospectively assigns people or a group of people to an intervention, with or without concurrent comparison or control groups, to study the relationship between a health-related intervention and a health outcome”(9). Two independent reviewers (RS, GL, RP) then performed full-text screening. All papers meeting the ICMJE clinical trial definition were included, whereas articles that did not meet the definition were excluded. Studies looking at both health-related and



1  
2  
3 non-health-related outcomes were included but data abstraction focused on health-related  
4  
5 outcomes only. Disagreements were resolved by consensus.  
6  
7

## 8 **Data abstraction**

9  
10 Two independent assessors (RS, GL, RP) reviewed each article and its supplemental files to  
11  
12 evaluate the reporting of pre-specified criteria and extracted data using preformatted Excel  
13  
14 spreadsheets. Table 2 presents the main criteria that were abstracted and a reason for their  
15  
16 selection. The transparency and rigor criteria are based on CONSORT criteria for methods and  
17  
18 results reporting (7,8). We also abstracted additional open science criteria, focusing on the open  
19  
20 access status of the trial publication, whether a data availability statement was included and  
21  
22 whether data were deposited in a public repository (37). The abstraction protocol was deposited  
23  
24 on the Open Science Framework (RRID:SCR\_003238) at <https://osf.io/q8b46/>.  
25  
26  
27

## 28 **Protocol Deviations**

29  
30 For trials with exercise interventions, we assessed the frequency, intensity, and volume of exercise  
31  
32 for experimental and control interventions. The protocol was modified if the control intervention  
33  
34 did not involve exercise. Control interventions were rated as fully reported if the frequency, the  
35  
36 content, and the duration was described. Control groups that received no intervention (e.g. wait-  
37  
38 and-see) were rated as fully reported if the activity status or number of other treatments were  
39  
40 monitored.  
41  
42

43 Trial registration statement assessments were amended to determine whether trials were  
44  
45 registered prospectively or retrospectively. Two abstractors (RS, MP) assessed each trial  
46  
47 registration. Trials were considered pre-registered if their registration was completed before the  
48  
49 first participant was enrolled. Otherwise, the trial was classified as retrospectively registered. If the  
50  
51 primary outcome was changed after the study began, the trial was classified as retrospectively  
52  
53 registered.  
54  
55

## 56 **Statistical Analysis**

1  
2  
3 This exploratory study assessed the prevalence of reporting for selected criteria in sports medicine  
4 and orthopedics clinical trials. Results are presented as the percentage of trials reporting each  
5 outcome measure, with a 95% confidence interval.  
6  
7

8  
9 Odds ratios and their 95% confidence intervals were calculated to examine the relationship  
10 between the completeness of reporting and pre-registration, the use of flow charts, or the presence  
11 of sample size calculations and the completeness of reporting. Odds ratios were interpreted as  
12 unclear if the confidence interval included 1. These analyses were not pre-registered.  
13  
14  
15  
16

### 17 18 **Sample Size Calculation** 19

20 This exploratory study does not require formal sample size calculations. However, we adhered to  
21 conventional sample size recommendations for exploratory designs and performed a precision-  
22 based sample size calculation to obtain rough estimates of relevant sample sizes (supplemental  
23 methods). Depending on different assumptions, a required sample size of 124 to 203 trials was  
24 estimated.  
25  
26  
27  
28  
29  
30

### 31 32 **Patient and public involvement** 33

34 Patients or the public were not involved in the design, or conduct, or reporting, or dissemination  
35 plans of our research.  
36  
37  
38  
39  
40  
41  
42  
43  
44  
45  
46  
47  
48  
49  
50  
51  
52  
53  
54  
55  
56  
57  
58  
59  
60

**Table 2** Criteria for reporting and transparent research practices. The table shows specific questions used to assess each outcome criteria and provides a brief justification for why each criteria was selected. Created by the authors.

| Category                                        | Assessment                                                                                                                                                                                                                                                                                                                                                                                              | Rationale and Context                                                                                                                                                                                                                                                                                                                                                                                                                                                                                                                                                                                                           |
|-------------------------------------------------|---------------------------------------------------------------------------------------------------------------------------------------------------------------------------------------------------------------------------------------------------------------------------------------------------------------------------------------------------------------------------------------------------------|---------------------------------------------------------------------------------------------------------------------------------------------------------------------------------------------------------------------------------------------------------------------------------------------------------------------------------------------------------------------------------------------------------------------------------------------------------------------------------------------------------------------------------------------------------------------------------------------------------------------------------|
| <b>Sample Size calculation</b>                  | <p>Was an a priori sample size calculation performed?</p> <p>What type of sample size calculation was performed?</p> <p>Did the authors provide a justification for the expected effect size?</p>                                                                                                                                                                                                       | <ul style="list-style-type: none"> <li>- Low power is associated with high rates of spurious findings and overinflated effect sizes (38), and there is evidence for low median statistical power in rehabilitation research (39).</li> <li>- A priori sample size calculations help to prevent underpowered trials, however, they are regularly performed inadequately. Common problems include failing to justify the expected treatment effect and not stating all values required for calculation (40). The majority of sample size calculations in rehabilitation trials are missing expected effect sizes (41).</li> </ul> |
| <b>Randomization &amp; concealed allocation</b> | <p>Did the authors address whether randomization was used?</p> <p>If so, were the randomization type and method mentioned?</p> <p>Were the following details of the allocation concealment procedure addressed?</p> <ul style="list-style-type: none"> <li>- Who generated the randomization sequence?</li> <li>- Who enrolled participants?</li> <li>- Who assigned participants to groups?</li> </ul> | <ul style="list-style-type: none"> <li>- Inadequate randomization and allocation concealment procedures introduce selection bias and are associated with increased odds of significant but spurious results (42) and overestimated treatment effects (43).</li> </ul>                                                                                                                                                                                                                                                                                                                                                           |
| <b>Blinding</b>                                 | <p>Did the article include a statement on blinding?</p> <p>Was the blinding status of each of the major stakeholders mentioned (participants, healthcare providers, outcome assessors, data analysts)?</p> <p>Was each stakeholder group blinded?</p>                                                                                                                                                   | <ul style="list-style-type: none"> <li>- Blinding prevents ascertainment bias in clinical trials. A lack of blinding is associated with overinflated effect sizes (44). Terms like double-blind are ambiguous, interpreted differently, and don't provide reliable information on blinding of specific stakeholder groups (45). These terms should be abandoned in favor of reporting the blinding status of all relevant stakeholders (8).</li> </ul>                                                                                                                                                                          |
| <b>Flow of participants</b>                     | <p>Were the inclusion and exclusion criteria clearly stated?</p> <p>Did the authors define how many participants were excluded at each phase of the study and list reasons for exclusion?</p> <p>Did the authors present this information in a flow chart?</p>                                                                                                                                          | <ul style="list-style-type: none"> <li>- Detailed inclusion and exclusion criteria help the reader to assess generalizability.</li> <li>- Knowing when and why participants dropped out or were removed from the study is essential to estimate attrition bias.</li> </ul>                                                                                                                                                                                                                                                                                                                                                      |
| <b>Data analysis</b>                            | <p>Was a study hypothesis presented and a primary outcome specified?</p> <p>Was the hypothesis supported or rejected?</p>                                                                                                                                                                                                                                                                               | <ul style="list-style-type: none"> <li>- Specifying the study hypothesis and the primary outcome prospectively safeguards against selective reporting. Discrepancies between the registration</li> </ul>                                                                                                                                                                                                                                                                                                                                                                                                                        |

|                                                                                        |                                                                                                                                                                                                                                                                                                                                                                                               |                                                                                                                                                                                                                                                                                                                                                                                                                                                                                                                                                                                                                                                                                                                                                                                                                                  |
|----------------------------------------------------------------------------------------|-----------------------------------------------------------------------------------------------------------------------------------------------------------------------------------------------------------------------------------------------------------------------------------------------------------------------------------------------------------------------------------------------|----------------------------------------------------------------------------------------------------------------------------------------------------------------------------------------------------------------------------------------------------------------------------------------------------------------------------------------------------------------------------------------------------------------------------------------------------------------------------------------------------------------------------------------------------------------------------------------------------------------------------------------------------------------------------------------------------------------------------------------------------------------------------------------------------------------------------------|
| <p>1<br/>2<br/>3<br/>4<br/>5<br/>6<br/>7<br/>8<br/>9<br/>10<br/>11<br/>12<br/>13</p>   | <p>If NHST was performed, were exact p-values, degrees of freedom, and the test statistics presented?<br/>Were standardized effect sizes and their precision reported?</p>                                                                                                                                                                                                                    | <p>and the study report may indicate outcome switching, which favors statistically significant results and introduces selective reporting bias (46,47).</p> <ul style="list-style-type: none"> <li>- Reporting the test statistic and degrees of freedom allows readers to identify misreported p-values. In 13% of psychology studies, meta-researchers detected mismatches between p-values and the reported test statistic and degrees of freedom that would affect statistical conclusions (48).</li> <li>- Analyses should take the magnitude, confidence, and likelihood of an effect into account, instead of focusing on whether effects are statistically significant. Effect sizes show the magnitude of effects within a study, while standardized effect sizes allow for comparisons across studies (49).</li> </ul> |
| <p>14<br/>15<br/>16<br/>17</p>                                                         | <p><b>Data visualization</b><br/>Were bar graphs used to visualize continuous data?</p>                                                                                                                                                                                                                                                                                                       | <ul style="list-style-type: none"> <li>- Using bar graphs to visualize continuous data is problematic because many different data distributions can lead to the same bar graph. The actual data may suggest different conclusions from the summary statistics alone (50,51).</li> </ul>                                                                                                                                                                                                                                                                                                                                                                                                                                                                                                                                          |
| <p>18<br/>19<br/>20<br/>21<br/>22<br/>23<br/>24<br/>25<br/>26<br/>27<br/>28<br/>29</p> | <p><b>Intervention reporting</b><br/>What type of intervention was performed (e.g. exercise, physical therapy, surgery)?<br/>For exercise interventions:<br/>- Was monitoring of adherence to the intervention addressed?<br/>- Were essential details needed to replicate the experimental and control interventions (e.g. frequency, intensity, volume, and type of exercise) provided?</p> | <ul style="list-style-type: none"> <li>- When clinical trials do not report details needed to implement the intervention, findings cannot be translated into clinical practice. The minority of exercise studies provided enough information to allow others to replicate interventions (52). The high prevalence of insufficient reporting led to the establishment of new intervention reporting guidelines (53,54).</li> <li>- Adherence can effect intervention efficacy. Intervention effects can be up to three times larger in fully adherent participants compared to partly adherent participants (55).</li> </ul>                                                                                                                                                                                                      |
| <p>30<br/>31<br/>32<br/>33<br/>34<br/>35<br/>36<br/>37<br/>38<br/>39</p>               | <p><b>Transparency criteria</b><br/>Was the study registered or pre-registered?<br/>Was a data availability statement included? Were the data publically available?<br/>Was the study openly accessible?</p>                                                                                                                                                                                  | <ul style="list-style-type: none"> <li>- Half of researchers admit to selectively reporting results and presenting post hoc analyses as if they had been pre-specified (22). Pre-registration protects against this. Pre-registration (since 2005) and data availability statements (since 2018) are mandatory for clinical trials (56).</li> <li>- Open access papers generate more media coverage and citations (57).</li> <li>- Open data facilitates collaboration and benefits society (57). In 2017, 21% of 316 biomedical journals (58) and 28% of funders (59) required open data.</li> </ul>                                                                                                                                                                                                                            |

## Results

175 articles were screened, and 168 articles were reviewed from 27 sports medicine and orthopedics journals (Figure S1, Table S1). Eleven articles were excluded because they did not meet the ICMJE clinical trial criteria. One extended conference abstract was excluded because it was not a full-length research article. Analyses included the remaining 163 papers.

For peer review only

## Rigor and Sample Criteria

**Figure 1** Reporting prevalence for rigor and sample criteria. This plot displays the percentage of trials that addressed each criteria. For information on the actual randomization or blinding status, please refer to the text. The different colored data points are for better visual differentiation of each subcategory. Created by the authors.

**Sample size calculations:** The reporting prevalence of sample size calculations and related results can be found in Figure 1. In trials not reporting a priori sample size calculation (Figure 1), 2% (CI 0-5%; n=4) reported that no sample size calculation was performed because the study was an exploratory pilot study. Among trials reporting sample size calculations (n=98), 53% (CI 43-63%; n=52) included a justification for the expected effect size. The remaining trials either presented no justification (39%; CI 23-42; n=32) or used arbitrary effect size thresholds (14%; CI 7-21%; n=14). Almost all sample size calculations were based on statistical power (93%; CI 88-98%; n=96). Two sample size calculations were based on precision (2%; CI 0-5%). No calculations were based on Bayes methods.

**Randomization and allocation concealment:** The reporting prevalence of randomization, allocation concealment and related results can be found in Figure 1. In trials not addressing randomization (Figure 1), two trials (1%; CI 0-3%) were not randomized, and five trials did not mention randomization (3%; CI 0-6%).

Eight percent (CI 4-12%; n=13) of trials provided complete information on the allocation concealment procedure (defined as reporting who generated the randomization sequence, and who enrolled participants and assigned them to interventions). Some of this information was available 23% (CI 16-29%; n=37) of trials, and 69% (CI 62-76%; n=113) did not report any information. Few studies reported at least some information on all three factors needed to assess randomization and allocation concealment (randomization type, method, and allocation concealment; 18%; CI 12-24%; n=30).

**Blinding:** The reporting prevalence of statements on blinding of different stakeholders can be found in Figure 1. The actual blinding status of included trials is visualized in Figure 2. Two-thirds

1  
2  
3 of trials addressed blinding (Figure 2). Among trials that addressed blinding (Figure 1), 81% (CI  
4 73-88%; n=84) used blinding, while 19% (CI 12-27%; n=20) were not blinded. Only 4% (CI 1-7%;  
5 n=7) of all trials addressed the blinding status of all four stakeholder groups (Figure 2). Trials were  
6 most likely to address the blinding status of the outcome assessors and the participants. The  
7 blinding status of data analysts is typically unreported.  
8  
9  
10  
11  
12

13  
14  
15 **Figure 2** The blinding status across the main different stakeholder groups across all clinical trials  
16 (n=163). Created by the authors.  
17  
18  
19  
20  
21  
22  
23  
24  
25  
26  
27  
28  
29  
30  
31  
32  
33  
34  
35  
36  
37  
38  
39  
40  
41  
42  
43  
44  
45  
46  
47  
48  
49  
50  
51  
52  
53  
54  
55  
56  
57  
58  
59  
60

## Sample-related Criteria

The reporting prevalence of criteria related to the study sample can be found in Figure 1. Approximately three-quarters of trials reported the inclusion and exclusion criteria and provided complete information on the number of participants at enrollment, after enrollment, and included in data analysis (Figure 1). Fewer trials used a flow chart to illustrate the number of included and excluded participants at each stage. Among trials that did not report the reasons for all exclusions after enrollment (Figure 1), 17% (CI 11-22%; n=24/90) reported the reasons for some exclusions and 33% (CI 26-41%; n=41/90) did not report any information.

In trials that stated participants' sex or gender (Figure 1), a median of 51% (interquartile range (IQR) 27-71%) of participants were women in the group with the highest proportion of women, vs. 49% (IQR 22-66%) in the group with the lowest proportion of women.

## Intervention Criteria

The most frequent intervention type was exercise (44%; CI 37-52%; n=72), followed by surgery (26%; CI 19-32%; n=42). Diet (6%; CI 2-9%; n=9), physical therapy (5%; CI 2-8%; n=8), pharmacological interventions (4%; CI 0-2%; n=7) and manual therapy (1%; CI 0-2%; n=1) were uncommon. Fifteen percent (CI 9-20% n=24) of studies used other interventions.

We next examined reporting of details needed to assess or implement exercise interventions. Sixty-two percent (CI 50-73%; n=42) of trials with exercise interventions monitored adherence or compliance, one trial (1%; CI 0-4%) reported that adherence was not monitored, and 37% (CI 25-48%; n=25) of trials did not mention intervention adherence or compliance. All trials reported at least some information about the experimental exercise intervention, and most trials provided complete information (Table 2) (83%; CI 75-92%; n=60). Fewer trials reported complete information for the control interventions (63%; CI 51-74%; n=45). Five trials did not provide any information about the control intervention (7%; CI 1-13%).



## Data analysis and Transparency Criteria

**Figure 3** Reporting prevalence for data analysis and transparency criteria. This plot displays the percentage of trials that addressed each criteria. Abbreviations: NHST, null hypothesis statistical testing; ES, effect size. Created by the authors.

**Hypotheses and outcome measures:** The reporting prevalence of the study hypotheses and outcome measures can be found in Figure 3. Nearly half of the articles specified a primary outcome and almost two-thirds of articles presented a hypothesis (Figure 3). Among clinical trials that reported a hypothesis (Figure 3), 61% (CI 53-68%; n=62) supported the main hypothesis, while 39% of trials (CI 32-47; n=40) did not support the main hypothesis.

**Statistical Reporting:** Figure 3 shows the reporting prevalence of criteria related to statistical reporting and data visualization. Almost all studies used NHST (Figure 3). While most trials reported exact p-values, few reported test statistics and degrees of freedom. Approximately half of the trials reported standardized effect sizes but only 21% included the precision of the effect size estimates. One study reported Bayesian statistics (1%; CI 0-2%).

**Data visualization:** Bar graphs were used to display continuous data in 21% (CI 15-21%; n=34) of trials.

### Transparency

The reporting prevalence of transparency criteria are shown in Figure 3. Most of the studies with registration statements (Figure 3) were registered in ClinicalTrials.gov (n=52), followed by the Australian New Zealand Clinical Trials Registry (n=9), International Standard Randomized Controlled Trial Number Register (n=4), and other regional clinical trials registries (n=9). Less than half of the registered trials, and 20% of all trials, were pre-registered. The remaining trials with registration statements were registered retrospectively (58%; CI 48-69%; n=49/84). This included six prospectively registered trials where the primary outcome was changed after data collection started. Two studies with registration statements did not provide sufficient information to determine whether the study was registered prospectively or retrospectively (2%; CI 0-6%; n=2/84).

1  
2  
3 Data availability statements were uncommon (Figure 3). No trial with a data availability statement  
4 deposited data publically in an open repository. Twenty-one percent of trials with data availability  
5 statements (15-27%; n=4) noted that data were not publicly available, whereas 74% (67-80%;  
6 n=15) stated that data were available upon request. One study (5%; CI 2-9%) reported that all  
7 data were available in the main text and its supplements, however, raw data was not available in  
8 either location.  
9  
10  
11  
12  
13  
14  
15  
16  
17  
18  
19  
20  
21  
22  
23  
24  
25  
26  
27  
28  
29  
30  
31  
32  
33  
34  
35  
36  
37  
38  
39  
40  
41  
42  
43  
44  
45  
46  
47  
48  
49  
50  
51  
52  
53  
54  
55  
56  
57  
58  
59  
60

## Exploratory analyses

**Pre-registration and reporting:** Compared to unregistered or retrospectively registered studies, pre-registered studies were more likely to report complete information for randomization (type and method) and allocation concealment (OR 4.3; CI 1.9-10.0), whether all stakeholders were blinded (OR 8.6; CI 1.6-46.5), a priori sample size calculations (OR 2.5; CI 1.1-5.8), justifications for expected effect sizes used in power calculations (OR 2.5; CI 1.1-5.8), and specifying the primary outcome measure (OR 3.3; CI 1.5-7.1). The odds of reporting (OR 1.0; CI 0.48-2.1) or rejecting (OR 1.0; CI 0.42-2.6) the study hypothesis were not clearly different between unregistered and pre-registered studies.

**Sample size calculations and reporting:** The odds of rejecting the main hypothesis in trials with a priori sample calculations were unclear (OR 1.3; CI 0.6-2.8). Trials that provided justifications for the expected effect size were more likely to reject the study hypothesis (OR 2.5; CI 1.2-5.2).

**Flow charts and reporting:** The odds of reporting all reasons for dropouts (OR 4.6; CI 2.3-9.3) and explicitly reporting the number of participants in each group that were included in the data analysis (OR 163.3; CI 21.4-1248.5) were higher among studies that used flow charts to track participant flow, compared to those that did not.

## Discussion

Sports medicine and orthopedics researchers have recently emphasized rigorous study design and reporting to make research easier to understand, interpret, and translate into clinical practice (16). Calls for more transparent reporting in orthopedics and sports medicine (19,26,60) followed older studies suggesting that poor clinical trial reporting limits readers ability to assess study quality and risk of bias (13,61,62). Our study shows that while most studies include a general statement about rigor criteria, like blinding or randomization, these statements lack essential details needed to assess the risk of bias. The majority of trials report criteria related to the study sample, such as the sex of participants, inclusion and exclusion criteria, or the number of participants finally included in the analysis. Only 20% of studies were pre-registered. No study shared data in open repositories.

### Opportunities to improve reporting

These results highlight two main opportunities to improve transparency and reproducibility in sports medicine and orthopedics clinical trials; improving reporting for essential details of the main CONSORT elements and increasing uptake of open science practices.

First, our results indicate that most authors are aware that they need to address factors like blinding, randomization and sample size calculations; however, few provide the essential details required to evaluate the trial and interpret the results. Almost all trials addressed blinding, for example, but only 4% reported the blinding status of all main stakeholders. Educational efforts should emphasize the difference between informative and uninformative reporting (see example in Figure 4).

**Figure 4** A priori sample size calculations are essential for generating meaningful results with clinical trials. Created by the authors. This infographic focusses on key elements a priori sample size calculations that should be reported in clinical trial publication. However, it is important to note that each element should be justified individually including the thresholds for type 1 and type 2 errors, and the expected effect size. Daniel Lakens free article on sample size justification

1  
2  
3 provides an excellent overview of aspects to consider when planning empirical research studies  
4 (63).  
5

6 CONSORT writing templates may also help (61). Target criteria should include the blinding status  
7  
8 of all main stakeholders, randomization type and method, how and by whom concealed allocation  
9  
10 was performed, and effect size justifications in sample size calculations.  
11

12  
13 Second, interventions are needed to increase pre-registration and data sharing. Although the  
14  
15 ICJME has required clinical trial pre-registration since 2005 (62), only one-fifth of trials were pre-  
16  
17 registered. Pre-registered studies had higher odds of reporting several rigor criteria, potentially  
18  
19 suggesting that authors who preregister may be more aware of reporting guidelines. Our results  
20  
21 are consistent with previous findings (64) that trial registrations were among the least reported  
22  
23 CONSORT items in sports medicine. A recent study in kinesiology shows even lower rates of pre-  
24  
25 registration, data-availability statements, and data sharing in open repositories (65). Sports  
26  
27 medicine researchers have already noted that pre-registration and registered reports can prevent  
28  
29 questionable research practices (26) (Table 1) or make them easier to detect (66).  
30  
31

32  
33 Data were not shared in public repositories, suggesting that this topic requires special attention.  
34  
35 The benefits of data sharing for authors include more citations (67,68), likely increased  
36  
37 trustworthiness (69), and increased opportunities to collaborate with researchers who want to  
38  
39 perform secondary analyses (70). Recent materials have addressed many common concerns  
40  
41 about sharing patient data, including data privacy and confidentiality (71–73). Regulations vary  
42  
43 by country and institution. Some institutions have designated support staff for data sharing.  
44  
45 Researchers should contact their institutions' data privacy, statistics, or ethics offices to identify  
46  
47 local experts. Seventy-four percent of trials with data availability statements noted that data were  
48  
49 available on request. This is problematic, as such data are often unavailable and the odds of  
50  
51 obtaining data decline precipitously with time since publication (74).  
52  
53

54  
55 Interestingly, our exploratory analysis revealed that the odds of rejecting the study hypothesis  
56  
57 were 2.5 (CI 1.2-5.2) times higher in trials that provided a justification for the expected effect size  
58  
59

1  
2  
3 in sample size calculations. This might indicate overinflated effect sizes, as trials that based their  
4 sample size calculation on effect sizes published in earlier studies more often failed to find a similar  
5 sized effect. Inflated effect sizes were also observed in the psychological science reproducibility  
6 project, where replicated effects were generally smaller than those in the initial studies (75).

7  
8  
9  
10  
11 Authors should also be encouraged to report the data analysis transparently. Our study shows  
12 that more than one-fifth of the included trials used bar graphs to visualize continuous data. While  
13 this practice is common in many fields (76), these figures are problematic because many different  
14 data distributions can lead to the same summary statistics shown in bar graphs. Researchers  
15 should use data visualisations that show the data distribution, such as dot plots, box plots, or violin  
16 plots (50,51). Reporting of test statistics and degrees of freedom yields much potential for  
17 improvement, as well as reporting of standardized effect sizes and their precision. Instead of  
18 making decisions based on p-values alone, reporting the size and precision of effects in  
19 combination with the p-value provides a more complete representation of the results and reduces  
20 the likelihood of spurious findings. Twenty-five to 38% of medical articles (77), and up to 50% in  
21 psychology papers (48), contain p-values that don't match the reported test-statistic and degrees  
22 of freedom. These inaccurate p-values may alter study conclusions in 13% of psychology papers  
23 (48). Our study shows that these assessments are impossible in sports medicine and orthopedics  
24 clinical trials, as test statistics and degrees of freedom are rarely reported.

25  
26  
27  
28  
29  
30  
31  
32  
33  
34  
35  
36  
37  
38  
39  
40  
41 Reporting of criteria related to the study sample and to exercise interventions highlighted some  
42 positive points. Whereas Costello et al. (78) observed that less than 40% of sports and exercise  
43 study participants were females, indicating sex bias, our study, on average, shows an even  
44 distribution of sex/gender. Similarly the number of participants included in the analysis was  
45 reported in 75% of trials in the present study, compared to 42% of randomized controlled trials in  
46 orthopedic journals (13). The introduction of flow charts to display the participant flow in  
47 CONSORT 2010 may improve reporting for sample related criteria, as trials which included flow  
48 charts were more likely to report the number of participants included in the analysis and reasons  
49  
50  
51  
52  
53  
54  
55  
56  
57  
58  
59

1  
2  
3 for all exclusions. While the majority of studies reported key details of exercise interventions,  
4 reporting was less comprehensive for the control intervention and for intervention adherence or  
5 compliance.  
6  
7  
8  
9  
10  
11  
12  
13  
14  
15  
16  
17  
18  
19  
20  
21  
22  
23  
24  
25  
26  
27  
28  
29  
30  
31  
32  
33  
34  
35  
36  
37  
38  
39  
40  
41  
42  
43  
44  
45  
46  
47  
48  
49  
50  
51  
52  
53  
54  
55  
56  
57  
58  
59  
60

For peer review only

## Options for systemic interventions to improve reporting

Ongoing reporting deficiencies in clinical trials highlight the need for systemic interventions to improve reporting. The 2010 CONSORT guideline has been endorsed by more than 50% of the core medical journals and the ICMJE (79). Transparent research practices and reporting need to be incentivized on different levels and by different stakeholders in the academic research lifecycle (80,81). Persistent reporting deficiencies (12,21) indicate that endorsement without enforcement is insufficient (82,83), and engaging individuals, journals, funders, and institutions is necessary to improve reporting (80,84).

One option to improve reporting is for journals to enforce existing guidelines and policies. All journals in our sample were peer reviewed; yet there were major essential details were often missing from published trials. This suggests that peer review alone is insufficient. Alternatives include rigorous manual review by trained “trial reporting” assessors, automated screening or a combined approach. A journal program that trained early career researchers to check for common data visualization errors was well accepted by authors and increased compliance with data presentation guidelines (85). Implementing similar programs, using paid staff, could improve CONSORT compliance. Alternatively, automated screening tools may efficiently flag missing information for peer reviewers (86,87). Peer review systems at several journals include an automated tool that checks statistical reporting and guideline adherence (88). Tools are available to screen for risk of bias (RobotReviewer;RRID:SCR\_021064 (89)), and CONSORT methodology criteria (CONSORT-TM;RRID:SCR\_021051 (90)). The CONSORT tool performs well for frequently reported criteria, but needs more training data for less often reported criteria (90). New tools may need to be created to assess details like the specifics of allocation concealment, blinding of specific stakeholders, or justifications of expected effect sizes. As 52% of clinical trials in our sample were published in only five journals, systemic efforts to improve reporting on journal level can make a noticeable difference on clinical trial reporting in the field.



1  
2  
3 A second option is automated screening of sports medicine and orthopedics preprints. Preprints,  
4 which are posted on public servers such as medRxiv and sportRxiv prior to peer review, allow  
5 authors to receive feedback and improve their manuscripts before journal submission. Large-scale  
6 automated screening of bioRxiv and medRxiv preprints for rigor and transparency criteria is  
7 feasible and could raise awareness about factors affecting transparency and reproducibility (91).  
8 Automated screening has limitations – the tools make mistakes and cannot always determine  
9 whether a particular item is relevant to a given study. Automated screening may complement peer  
10 review, but is not a replacement. The value of this approach will also depend on the proportion of  
11 trials that are posted as preprints.  
12  
13  
14  
15  
16  
17  
18  
19  
20  
21

22 Dashboards may offer a third option for monitoring changes in practice over time, and raising  
23 awareness about the importance of specific reporting practices among researchers, policymakers  
24 and the public. When used to inform incentives systems, dashboards may potentially contribute  
25 to improved reporting. Dashboards may work best in combination with other measures, like policy  
26 changes, incorporating practices described in dashboards into researcher assessments, or  
27 rewarding researchers for improving reporting.. Policymakers and the scientific community can  
28 use dashboards to evaluate the effectiveness of interventions to improve scientific practice.  
29 Dashboards can show if interventions fail to make an impact on scientific practice or that further  
30 incentives are needed to drive the desired change. Examples include dashboards on open science  
31 (92), and trial results reporting (93). In sports medicine and orthopedics, clinical trial dashboards  
32 could track transparent research practices for journals, society publishers, or all publications, and  
33 should include commonly missed items identified in this study. Researchers may need to develop  
34 new automated tools to track some criteria.  
35  
36  
37  
38  
39  
40  
41  
42  
43  
44  
45  
46  
47  
48  
49

50 The scientific community has long relied on educational resources to improve reporting. On-  
51 demand resources include the CONSORT guideline use webinar by Altman (94), and open  
52 webinars on pre-registration, sample size justification and other topics offered by the Society for  
53 Transparency, Openness, and Replication in Kinesiology (95). Creating a single platform with  
54  
55  
56  
57  
58  
59

1  
2  
3 field-relevant resources; then collaborating with large journals, publishers, and societies, may help  
4  
5 to disseminate materials to the global orthopedics and sports medicine community.  
6  
7

## 8 **Limitations**

9  
10  
11 Our CONSORT-based evaluation criteria for intervention reporting were not optimized for non-  
12  
13 exercise or wait-and-see control interventions. While the assessments required by guidelines for  
14  
15 intervention reporting (53,54) were beyond the scope of this study, previous studies assessed  
16  
17 intervention reporting in detail (17,52,55,96). Larger, confirmatory studies are needed to examine  
18  
19 relationships between different variables, as odds ratios calculated in the present study were  
20  
21 exploratory post-hoc calculations. We examined the top 25% sports medicine and orthopedics  
22  
23 journals; hence our findings may not be generalizable to journals that are not indexed by PubMed,  
24  
25 lower tier journals, non-English journals, or unpublished trials. The use of the clinical trial filter may  
26  
27 have led to the exclusion of a small number of trials that were incorrectly classified upon indexing.  
28  
29  
30

## 31 **Conclusions**

32  
33  
34  
35 The present study in recent sports medicine and orthopedic clinical trials shows that authors often  
36  
37 report general information on rigor criteria but few provide the essential details to assess risk of  
38  
39 bias required by existing guidelines. Examples include the blinding status of all main stakeholders,  
40  
41 information on the concealed assignment, or the justification of expected effect sizes in sample  
42  
43 size calculations. Further, transparent research practices like pre-registration or data sharing are  
44  
45 rarely used in sports medicine and orthopedics.  
46  
47

48  
49 As reporting guidelines for clinical trial reporting are long established and well accepted across  
50  
51 medical fields, the persistent lack of detailed reporting suggests that education and existing  
52  
53 guidelines alone are not working. Better incentives, further interventions, and other innovative  
54  
55 approaches are needed to improve clinical trial reporting further. We present different options for  
56  
57 future interventions might investigate rigorous peer-reviewer training, automated screening of  
58  
59

1  
2  
3 submitted manuscripts and preprints, and field-specific dashboards to monitor reporting and  
4 transparent research practices to increase awareness and track improvements over time. Our  
5 results show which aspects of clinical trial reporting have the greatest need for improvement.  
6  
7 Researchers can use this data to tailor future interventions to improve reporting to the needs of  
8  
9 the sports medicine and orthopedics community.  
10  
11  
12  
13  
14  
15  
16  
17  
18  
19  
20  
21  
22  
23  
24  
25  
26  
27  
28  
29  
30  
31  
32  
33  
34  
35  
36  
37  
38  
39  
40  
41  
42  
43  
44  
45  
46  
47  
48  
49  
50  
51  
52  
53  
54  
55  
56  
57  
58  
59  
60

For peer review only

## Data availability statement

All data are available on the OSF and may be accessed under the Creative Commons Attribution 4.0 International License at the following link: <https://osf.io/q8b46/>.

## Contributorship statement

Robert Schulz was involved in conceptualization, project administration, methodology, investigation, data curation, formal analysis, validation, visualization, and writing the original draft and edited versions. Tracey Weissgerber was involved in conceptualization, supervision, visualization and writing the original draft and edited versions. Georg Langen was involved in investigation, data curation, validation, and review and editing of the manuscript. Robert Prill was involved in investigation, and review and editing of the manuscript. Michael Cassel was involved in supervision, and review and editing the manuscript.

## Patient and public involvement

This meta-research study is not directly related to patients. Therefore, patients or the public were not involved in the design, or conduct, or reporting, or dissemination plans of our research.

## Research Ethics Approval

This is a meta-research study that does not involve human or animal participation and did not require ethical approval.

## Acknowledgements

We would like to acknowledge Mia Pattillo for her valuable contributions to extracting the registration status of trials.

## Funding

This research received no specific grant from any funding agency in the public, commercial, or not-for-profit sectors.

## Competing Interests

All authors declare no competing interests.

**Figure 1** Reporting prevalence for rigor and sample criteria. This plot displays the percentage of trials that addressed each criteria. For information on the actual randomization or blinding status, please refer to the text. The different colored data points are for better visual differentiation of each subcategory. Created by the authors.

**Figure 2** The blinding status across the main different stakeholder groups across all clinical trials (n=163). Created by the authors.

**Figure 3** Reporting prevalence for data analysis and transparency criteria. This plot displays the percentage of trials that addressed each criteria. Abbreviations: NHST, null hypothesis statistical testing; ES, effect size. Created by the authors.

**Figure 4** A priori sample size calculations are essential for generating meaningful results with clinical trials. Created by the authors.

view only

## References

1. Emanuel EJ, Wendler D, Grady C. What makes clinical research ethical? *JAMA*. 2000;283(20):2701–11. doi:10.1001/jama.283.20.2701 Cited in: PubMed; PMID 10819955.
2. Califf RM, DeMets DL. Principles from clinical trials relevant to clinical practice: Part I. *Circulation*. 2002;106(8):1015–21. doi:10.1161/01.CIR.0000023260.78078.BB Cited in: PubMed; PMID 12186809.
3. Gerstein HC, McMurray J, Holman RR. Real-world studies no substitute for RCTs in establishing efficacy. *The Lancet*. 2019;393(10168):210–1. doi:10.1016/S0140-6736(18)32840-X
4. Zarin DA, Goodman SN, Kimmelman J. Harms From Uninformative Clinical Trials. *JAMA*. 2019. doi:10.1001/jama.2019.9892 Cited in: PubMed; PMID 31343666.
5. Feudtner C, Schreiner M, Lantos JD. Risks (and benefits) in comparative effectiveness research trials. *N Engl J Med*. 2013;369(10):892–4. doi:10.1056/NEJMp1309322 Cited in: PubMed; PMID 23964898.
6. van Delden JJM, van der Graaf R. Revised CIOMS International Ethical Guidelines for Health-Related Research Involving Humans. *JAMA*. 2017;317(2):135–6. doi:10.1001/jama.2016.18977 Cited in: PubMed; PMID 27923072.
7. Schulz KF, Altman DG, Moher D. CONSORT 2010 statement: updated guidelines for reporting parallel group randomised trials. *PLoS Med*. 2010;7(3):e1000251. doi:10.1371/journal.pmed.1000251 Cited in: PubMed; PMID 20352064.
8. Moher D, Hopewell S, Schulz KF, Montori V, Gøtzsche PC, Devereaux PJ, Elbourne D, Egger M, Altman DG. CONSORT 2010 explanation and elaboration: updated guidelines for reporting parallel group randomised trials. *BMJ*. 2010;340:c869. doi:10.1136/bmj.c869 Cited in: PubMed; PMID 20332511.
9. ICMJE. Recommendations for the Conduct, Reporting, Editing and Publication of Scholarly Work in Medical Journals [Internet]. 2020 [cited 2020 Aug 4]. Available from: <http://www.ICMJE.org>.
10. Moher D, Simera I, Schulz KF, Hoey J, Altman DG. Helping editors, peer reviewers and authors improve the clarity, completeness and transparency of reporting health research. *BMC Med*. 2008;6:13. doi:10.1186/1741-7015-6-13 Cited in: PubMed; PMID 18558004.
11. Turner L, Shamseer L, Altman DG, Schulz KF, Moher D. Does use of the CONSORT Statement impact the completeness of reporting of randomised controlled trials published in medical journals? A Cochrane review. *Syst Rev*. 2012;160. doi:10.1186/2046-4053-1-60 Cited in: PubMed; PMID 23194585.
12. Dechartres A, Trinquart L, Atal I, Moher D, Dickersin K, Boutron I, Perrodeau E, Altman DG, Ravaut P. Evolution of poor reporting and inadequate methods over time in 20 920 randomised controlled trials included in Cochrane reviews: research on research study. *BMJ*. 2017;357:j2490. doi:10.1136/bmj.j2490 Cited in: PubMed; PMID 28596181.
13. Chess LE, Gagnier J. Risk of bias of randomized controlled trials published in orthopaedic journals. *BMC Med Res Methodol*. 2013;13:76. doi:10.1186/1471-2288-13-76 Cited in: PubMed; PMID 23758875.
14. Nielsen RO, Shrier I, Casals M, Nettel-Aguirre A, Møller M, Bolling C, Bittencourt NFN, Clarsen B, Wedderkopp N, Soligard T, Timpka T, Emery C, Bahr R, Jacobsson J, Whiteley R, Dahlstrom O, van Dyk N, Pluim BM, Stamatakis E, Palacios-Derflingher L, Fagerland MW, Khan KM, Ardern CL,

- 1  
2  
3 Verhagen E. Statement on methods in sport injury research from the 1st METHODS MATTER  
4 Meeting, Copenhagen, 2019. *Br J Sports Med.* 2020;54(15):941. doi:10.1136/bjsports-2019-  
5 101323 Cited in: PubMed; PMID 32371524.  
6
- 7 15. Zenko Z, Steele J, Mills J. *Communications in Kinesiology: A new open access journal from the*  
8 *Society for Transparency, Openness, and Replication in Kinesiology*; 2020. en.  
9
- 10 16. Verhagen E, Stovitz SD, Mansournia MA, Nielsen RO, Shrier I. *BJSM educational editorials:*  
11 *methods matter.* *Br J Sports Med.* 2018;52(18):1159–60. doi:10.1136/bjsports-2017-097998 Cited  
12 in: PubMed; PMID 28818955.  
13
- 14 17. Holden S, Rathleff MS, Jensen MB, Barton CJ. How can we implement exercise therapy for  
15 patellofemoral pain if we don't know what was prescribed? A systematic review. *Br J Sports Med.*  
16 2018;52(6):385. doi:10.1136/bjsports-2017-097547 Cited in: PubMed; PMID 29084726.  
17
- 18 18. Losina E. Why past research successes do not translate to clinical reality: gaps in evidence on  
19 exercise program efficacy. *Osteoarthritis Cartilage.* 2019;27(1):1–2.  
20 doi:10.1016/j.joca.2018.09.006 Cited in: PubMed; PMID 30248501.  
21
- 22 19. Knudson D. Confidence crisis of results in biomechanics research. *Sports Biomech.*  
23 2017;16(4):425–33. doi:10.1080/14763141.2016.1246603 Cited in: PubMed; PMID 28632059.  
24
- 25 20. Büttner F, Toomey E, McClean S, Roe M, Delahunt E. Are questionable research practices  
26 facilitating new discoveries in sport and exercise medicine? The proportion of supported  
27 hypotheses is implausibly high. *Br J Sports Med.* 2020. doi:10.1136/bjsports-2019-101863 Cited in:  
28 PubMed; PMID 32699001.  
29
- 30 21. Kane RL, Wang J, Garrard J. Reporting in randomized clinical trials improved after adoption of the  
31 CONSORT statement. *J Clin Epidemiol.* 2007;60(3):241–9. doi:10.1016/j.jclinepi.2006.06.016 Cited  
32 in: PubMed; PMID 17292017.  
33
- 34 22. Banks GC, O'Boyle EH, Pollack JM, White CD, Batchelor JH, Whelpley CE, Abston KA, Bennett AA,  
35 Adkins CL. Questions About Questionable Research Practices in the Field of Management. *Journal*  
36 *of Management.* 2016;42(1):5–20. doi:10.1177/0149206315619011  
37
- 38 23. Hutton JL, Williamson PR. Bias in meta-analysis due to outcome variable selection within studies.  
39 *Journal of the Royal Statistical Society: Series C (Applied Statistics).* 2000;49(3):359–70.  
40 doi:10.1111/1467-9876.00197  
41
- 42 24. Bernard R, Weissgerber TL, Bobrov E, Winham SJ, Dirnagl U, Riedel N. fiddle: a tool to combat  
43 publication bias by getting research out of the file drawer and into the scientific community. *Clin*  
44 *Sci (Lond).* 2020;134(20):2729–39. doi:10.1042/CS20201125 Cited in: PubMed; PMID 33111948.  
45
- 46 25. Chambers C. What's next for Registered Reports? *Nature.* 2019;573(7773):187–9.  
47 doi:10.1038/d41586-019-02674-6 Cited in: PubMed; PMID 31506624.  
48
- 49 26. Caldwell AR, Vigotsky AD, Tenan MS, Radel R, Mellor DT, Kreutzer A, Lahart IM, Mills JP,  
50 Boisgontier MP. Moving Sport and Exercise Science Forward: A Call for the Adoption of More  
51 Transparent Research Practices. *Sports Med.* 2020;50(3):449–59. doi:10.1007/s40279-019-01227-  
52 1 Cited in: PubMed; PMID 32020542.  
53
- 54 27. Chalmers I. Underreporting Research Is Scientific Misconduct. *JAMA.* 1990;263(10):1405.  
55 doi:10.1001/jama.1990.03440100121018  
56
- 57 28. Hopewell S, Loudon K, Clarke MJ, Oxman AD, Dickersin K. Publication bias in clinical trials due to  
58 statistical significance or direction of trial results. *Cochrane Database Syst Rev.*  
59 2009;(1):MR000006. doi:10.1002/14651858.MR000006.pub3 Cited in: PubMed; PMID 19160345.  
60

- 1
  - 2
  - 3
  - 4
  - 5
  - 6
  - 7
  - 8
  - 9
  - 10
  - 11
  - 12
  - 13
  - 14
  - 15
  - 16
  - 17
  - 18
  - 19
  - 20
  - 21
  - 22
  - 23
  - 24
  - 25
  - 26
  - 27
  - 28
  - 29
  - 30
  - 31
  - 32
  - 33
  - 34
  - 35
  - 36
  - 37
  - 38
  - 39
  - 40
  - 41
  - 42
  - 43
  - 44
  - 45
  - 46
  - 47
  - 48
  - 49
  - 50
  - 51
  - 52
  - 53
  - 54
  - 55
  - 56
  - 57
  - 58
  - 59
  - 60
29. Dwan K, Gamble C, Williamson PR, Kirkham JJ. Systematic review of the empirical evidence of study publication bias and outcome reporting bias - an updated review. *PLoS ONE*. 2013;8(7):e66844. doi:10.1371/journal.pone.0066844 Cited in: PubMed; PMID 23861749.
30. Kirkham JJ, Altman DG, Chan A-W, Gamble C, Dwan KM, Williamson PR. Outcome reporting bias in trials: a methodological approach for assessment and adjustment in systematic reviews. *BMJ*. 2018;362k3802. doi:10.1136/bmj.k3802 Cited in: PubMed; PMID 30266736.
31. Nunan D, Aronson J, Bankhead C. Catalogue of bias: attrition bias. *BMJ Evid Based Med*. 2018;23(1):21–2. doi:10.1136/ebmed-2017-110883 Cited in: PubMed; PMID 29367321.
32. ICMJE. Recommendations | Preparing a Manuscript for Submission to a Medical Journal: Methods - statistics [Internet]. 2021 [updated 2021 Apr 14; cited 2021 Apr 14]. Available from: <http://www.icmje.org/recommendations/browse/manuscript-preparation/preparing-for-submission.html>
33. Kerr NL. HARKing: hypothesizing after the results are known. *Pers Soc Psychol Rev*. 1998;2(3):196–217. doi:10.1207/s15327957pspr0203\_4 Cited in: PubMed; PMID 15647155.
34. Schulz R, Langen G, Prill R, Cassel M, Weissgerber T. The devil is in the details: Reporting and transparent research practices in sports medicine and orthopedic clinical trials; 2021. Retrieved from <https://osf.io/dm549>.
35. SCImago (SJR — SCImago Journal & Country Rank [Portal] [Internet]. 2020 [cited 2021 Feb 22]. Available from: <https://www.scimagojr.com/journalrank.php?category=2732>
36. Ouzzani M, Hammady H, Fedorowicz Z, Elmagarmid A. Rayyan-a web and mobile app for systematic reviews. *Syst Rev*. 2016;5(1):210. doi:10.1186/s13643-016-0384-4 Cited in: PubMed; PMID 27919275.
37. Nosek BA, Alter G, Banks GC, Borsboom D, Bowman SD, Breckler SJ, Buck S, Chambers CD, Chin G, Christensen G, Contestabile M, Dafoe A, Eich E, Freese J, Glennerster R, Goroff D, Green DP, Hesse B, Humphreys M, Ishiyama J, Karlan D, Kraut A, Lupia A, Mabry P, Madon TA, Malhotra N, Mayo-Wilson E, McNutt M, Miguel E, Paluck EL, Simonsohn U, Soderberg C, Spellman BA, Turitto J, VandenBos G, Vazire S, Wagenmakers EJ, Wilson R, Yarkoni T. SCIENTIFIC STANDARDS. Promoting an open research culture. *Science*. 2015;348(6242):1422–5. doi:10.1126/science.aab2374 Cited in: PubMed; PMID 26113702.
38. Button KS, Ioannidis JPA, Mokrysz C, Nosek BA, Flint J, Robinson ESJ, Munafò MR. Power failure: why small sample size undermines the reliability of neuroscience. *Nat Rev Neurosci*. 2013;14(5):365–76. doi:10.1038/nrn3475 Cited in: PubMed; PMID 23571845.
39. Kinney AR, Eakman AM, Graham JE. Novel Effect Size Interpretation Guidelines and an Evaluation of Statistical Power in Rehabilitation Research. *Arch Phys Med Rehabil*. 2020;101(12):2219–26. doi:10.1016/j.apmr.2020.02.017 Cited in: PubMed; PMID 32272106.
40. Charles P, Giraudeau B, Dechartres A, Baron G, Ravaud P. Reporting of sample size calculation in randomised controlled trials: review. *BMJ*. 2009;338b1732. doi:10.1136/bmj.b1732 Cited in: PubMed; PMID 19435763.
41. Abdul Latif L, Daud Amadera JE, Pimentel D, Pimentel T, Fregni F. Sample size calculation in physical medicine and rehabilitation: a systematic review of reporting, characteristics, and results in randomized controlled trials. *Arch Phys Med Rehabil*. 2011;92(2):306–15. doi:10.1016/j.apmr.2010.10.003 Cited in: PubMed; PMID 21272730.



- 1  
2  
3 42. Hewitt C, Hahn S, Torgerson DJ, Watson J, Bland JM. Adequacy and reporting of allocation  
4 concealment: review of recent trials published in four general medical journals. *BMJ*.  
5 2005;330(7499):1057–8. doi:10.1136/bmj.38413.576713.AE Cited in: PubMed; PMID 15760970.  
6  
7 43. Armijo-Olivo S, Saltaji H, da Costa BR, Fuentes J, Ha C, Cummings GG. What is the influence of  
8 randomisation sequence generation and allocation concealment on treatment effects of physical  
9 therapy trials? A meta-epidemiological study. *BMJ Open*. 2015;5(9):e008562.  
10 doi:10.1136/bmjopen-2015-008562 Cited in: PubMed; PMID 26338841.  
11  
12 44. Holman L, Head ML, Lanfear R, Jennions MD. Evidence of Experimental Bias in the Life Sciences:  
13 Why We Need Blind Data Recording. *PLoS Biol*. 2015;13(7):e1002190.  
14 doi:10.1371/journal.pbio.1002190 Cited in: PubMed; PMID 26154287.  
15  
16 45. Haahr MT, Hróbjartsson A. Who is blinded in randomized clinical trials? A study of 200 trials and a  
17 survey of authors. *Clin Trials*. 2006;3(4):360–5. doi:10.1177/1740774506069153 Cited in: PubMed;  
18 PMID 17060210.  
19  
20 46. Mathieu S, Boutron I, Moher D, Altman DG, Ravaud P. Comparison of registered and published  
21 primary outcomes in randomized controlled trials. *JAMA*. 2009;302(9):977–84.  
22 doi:10.1001/jama.2009.1242 Cited in: PubMed; PMID 19724045.  
23  
24 47. Chen T, Li C, Qin R, Wang Y, Yu D, Dodd J, Wang D, Cornelius V. Comparison of Clinical Trial  
25 Changes in Primary Outcome and Reported Intervention Effect Size Between Trial Registration and  
26 Publication. *JAMA Netw Open*. 2019;2(7):e197242. doi:10.1001/jamanetworkopen.2019.7242  
27 Cited in: PubMed; PMID 31322690.  
28  
29 48. Nuijten MB, Hartgerink CHJ, van Assen MALM, Epskamp S, Wicherts JM. The prevalence of  
30 statistical reporting errors in psychology (1985-2013). *Behav Res Methods*. 2016;48(4):1205–26.  
31 doi:10.3758/s13428-015-0664-2 Cited in: PubMed; PMID 26497820.  
32  
33 49. Lakens D. Calculating and reporting effect sizes to facilitate cumulative science: a practical primer  
34 for t-tests and ANOVAs. *Front Psychol*. 2013;4863. doi:10.3389/fpsyg.2013.00863 Cited in:  
35 PubMed; PMID 24324449.  
36  
37 50. Weissgerber TL, Milic NM, Winham SJ, Garovic VD. Beyond bar and line graphs: time for a new  
38 data presentation paradigm. *PLoS Biol*. 2015;13(4):e1002128. doi:10.1371/journal.pbio.1002128  
39 Cited in: PubMed; PMID 25901488.  
40  
41 51. Weissgerber TL, Winham SJ, Heinzen EP, Milin-Lazovic JS, Garcia-Valencia O, Bukumiric Z, Savic  
42 MD, Garovic VD, Milic NM. Reveal, Don't Conceal: Transforming Data Visualization to Improve  
43 Transparency. *Circulation*. 2019;140(18):1506–18. doi:10.1161/CIRCULATIONAHA.118.037777  
44 Cited in: PubMed; PMID 31657957.  
45  
46 52. Slade SC, Keating JL. Exercise prescription: a case for standardised reporting. *Br J Sports Med*.  
47 2012;46(16):1110–3. doi:10.1136/bjsports-2011-090290 Cited in: PubMed; PMID 22089077.  
48  
49 53. Hoffmann TC, Glasziou PP, Boutron I, Milne R, Perera R, Moher D, Altman DG, Barbour V,  
50 Macdonald H, Johnston M, Lamb SE, Dixon-Woods M, McCulloch P, Wyatt JC, Chan A-W, Michie S.  
51 Better reporting of interventions: template for intervention description and replication (TIDieR)  
52 checklist and guide. *BMJ*. 2014;348g1687. doi:10.1136/bmj.g1687 Cited in: PubMed; PMID  
53 24609605.  
54  
55 54. Slade SC, Dionne CE, Underwood M, Buchbinder R, Beck B, Bennell K, Brosseau L, Costa L, Cramp F,  
56 Cup E, Feehan L, Ferreira M, Forbes S, Glasziou P, Habetts B, Harris S, Hay-Smith J, Hillier S, Hinman  
57 R, Holland A, Hondras M, Kelly G, Kent P, Lauret G-J, Long A, Maher C, Morso L, Osteras N,  
58  
59

- Peterson T, Quinlivan R, Rees K, Regnaud J-P, Rietberg M, Saunders D, Skoetz N, Sogaard K, Takken T, van Tulder M, Voet N, Ward L, White C. Consensus on Exercise Reporting Template (CERT): Modified Delphi Study. *Phys Ther*. 2016;96(10):1514–24. doi:10.2522/ptj.20150668 Cited in: PubMed; PMID 27149962.
55. Verhagen EALM, Hupperets MDW, Finch CF, van Mechelen W. The impact of adherence on sports injury prevention effect estimates in randomised controlled trials: looking beyond the CONSORT statement. *J Sci Med Sport*. 2011;14(4):287–92. doi:10.1016/j.jsams.2011.02.007 Cited in: PubMed; PMID 21429793.
56. ICMJE. Recommendations | Clinical Trials [Internet]. 2021 [updated 2021 Jan 19; cited 2021 Jan 19]. Available from: <http://www.icmje.org/recommendations/browse/publishing-and-editorial-issues/clinical-trial-registration.html>
57. McKiernan EC, Bourne PE, Brown CT, Buck S, Kenall A, Lin J, McDougall D, Nosek BA, Ram K, Soderberg CK, Spies JR, Thaney K, Updegrave A, Woo KH, Yarkoni T. How open science helps researchers succeed. *Elife*. 2016;5. doi:10.7554/eLife.16800 Cited in: PubMed; PMID 27387362.
58. Vasilevsky NA, Minnier J, Haendel MA, Champieux RE. Reproducible and reusable research: are journal data sharing policies meeting the mark? *PeerJ*. 2017;5e3208. doi:10.7717/peerj.3208 Cited in: PubMed; PMID 28462024.
59. European Commission. Facts and Figures for open research data: Figures and case studies related to accessing and reusing the data produced in the course of scientific production. [Internet]. 2019 [updated 2019 Nov 5; cited 2021 Apr 8]. Available from: [https://ec.europa.eu/info/research-and-innovation/strategy/goals-research-and-innovation-policy/open-science/open-science-monitor/facts-and-figures-open-research-data\\_en#funderspolicies](https://ec.europa.eu/info/research-and-innovation/strategy/goals-research-and-innovation-policy/open-science/open-science-monitor/facts-and-figures-open-research-data_en#funderspolicies)
60. Halperin I, Vigotsky AD, Foster C, Pyne DB. Strengthening the Practice of Exercise and Sport-Science Research. *Int J Sports Physiol Perform*. 2018;13(2):127–34. doi:10.1123/ijsp.2017-0322 Cited in: PubMed; PMID 28787228.
61. Barnes C, Boutron I, Giraudeau B, Porcher R, Altman DG, Ravaud P. Impact of an online writing aid tool for writing a randomized trial report: the COBWEB (Consort-based WEB tool) randomized controlled trial. *BMC Med*. 2015;13(1):221. doi:10.1186/s12916-015-0460-y Cited in: PubMed; PMID 26370288.
62. Angelis C de, Drazen JM, Frizelle FA, Haug C, Hoey J, Horton R, Kotzin S, Laine C, Marusic A, Overbeke AJPM, Schroeder TV, Sox HC, van der Weyden MB. Clinical trial registration: a statement from the International Committee of Medical Journal Editors. *Ann Intern Med*. 2004;141(6):477–8. doi:10.7326/0003-4819-141-6-200409210-00109 Cited in: PubMed; PMID 15355883.
63. Lakens D. Sample Size Justification; 2021.
64. Harris JD, Cvetanovich G, Erickson BJ, Abrams GD, Chahal J, Gupta AK, McCormick FM, Bach BR. Current status of evidence-based sports medicine. *Arthroscopy*. 2014;30(3):362–71. doi:10.1016/j.arthro.2013.11.015 Cited in: PubMed; PMID 24581261.
65. Twomey R, Yingling V, Warne J, Schneider C, McCrum C, Atkins W, Murphy J, Romero Medina C, Harlley S, Caldwell A. Nature of Our Literature. *Commun in Kinesiology*. 2021;1(3). doi:10.51224/cik.v1i3.43
66. Warren M. First analysis of ‘pre-registered’ studies shows sharp rise in null findings. *Nature*. 2018. doi:10.1038/d41586-018-07118-1

- 1  
2  
3 67. Christensen G, Dafoe A, Miguel E, Moore DA, Rose AK. A study of the impact of data sharing on  
4 article citations using journal policies as a natural experiment. *PLOS ONE*. 2019;14(12):e0225883.  
5 doi:10.1371/journal.pone.0225883 Cited in: PubMed; PMID 31851689.  
6
- 7 68. Colavizza G, Hrynaszkiwicz I, Staden I, Whitaker K, McGillivray B. The citation advantage of linking  
8 publications to research data. *PLOS ONE*. 2020;15(4):e0230416.  
9 doi:10.1371/journal.pone.0230416 Cited in: PubMed; PMID 32320428.  
10
- 11 69. Lesk M, Mattern JB, Moulaison Sandy H. Are Papers with Open Data More Credible? An Analysis of  
12 Open Data Availability in Retracted PLoS Articles. In: Taylor NG, Christian-Lamb C, Martin MH,  
13 Nardi B, editors. *Information in Contemporary Society*. Cham: Springer International Publishing;  
14 2019. p. 154–61. (Lecture Notes in Computer Science; vol. 11420).  
15
- 16 70. Lo B, DeMets DL. Incentives for Clinical Trialists to Share Data. *N Engl J Med*. 2016;375(12):1112–5.  
17 doi:10.1056/NEJMp1608351 Cited in: PubMed; PMID 27653562.  
18
- 19 71. Mello MM, Francer JK, Wilenzick M, Teden P, Bierer BE, Barnes M. Preparing for responsible  
20 sharing of clinical trial data. *N Engl J Med*. 2013;369(17):1651–8. doi:10.1056/NEJMp1309073  
21 Cited in: PubMed; PMID 24144394.  
22
- 23 72. Taichman DB, Sahni P, Pinborg A, Peiperl L, Laine C, James A, Hong S-T, Haileamlak A, Gollogly L,  
24 Godlee F, Frizelle FA, Florenzano F, Drazen JM, Bauchner H, Baethge C, Backus J. Data Sharing  
25 Statements for Clinical Trials - A Requirement of the International Committee of Medical Journal  
26 Editors. *N Engl J Med*. 2017;376(23):2277–9. doi:10.1056/NEJMe1705439 Cited in: PubMed; PMID  
27 28581902.  
28
- 29 73. Keerie C, Tuck C, Milne G, Eldridge S, Wright N, Lewis SC. Data sharing in clinical trials - practical  
30 guidance on anonymising trial datasets. *Trials*. 2018;19(1):25. doi:10.1186/s13063-017-2382-9  
31 Cited in: PubMed; PMID 29321053.  
32
- 33 74. Vines TH, Albert AYK, Andrew RL, Débarre F, Bock DG, Franklin MT, Gilbert KJ, Moore J-S, Renaut S,  
34 Rennison DJ. The availability of research data declines rapidly with article age. *Curr Biol*.  
35 2014;24(1):94–7. doi:10.1016/j.cub.2013.11.014 Cited in: PubMed; PMID 24361065.  
36
- 37 75. Nosek B. Estimating the reproducibility of psychological science. *Science*. 2015;349(6251):aac4716.  
38 doi:10.1126/science.aac4716 Cited in: PubMed; PMID 26315443.
- 39 76. Riedel N, Schulz R, Kazezian V, Weissgerber T. Replacing bar graphs of continuous data with more  
40 informative graphics: Are we making progress?; 2022.  
41
- 42 77. García-Berthou E, Alcaraz C. Incongruence between test statistics and P values in medical papers.  
43 *BMC Med Res Methodol*. 2004;4(1):13. doi:10.1186/1471-2288-4-13 Cited in: PubMed; PMID  
44 15169550.  
45
- 46 78. Costello JT, Bieuzen F, Bleakley CM. Where are all the female participants in Sports and Exercise  
47 Medicine research? *Eur J Sport Sci*. 2014;14(8):847–51. doi:10.1080/17461391.2014.911354 Cited  
48 in: PubMed; PMID 24766579.  
49
- 50 79. CONSORT. Consort - Endorsers [Internet]. 2021 [updated 2021 Mar 19; cited 2021 Mar 19].  
51 Available from: <http://www.consort-statement.org/about-consort/endorsers1>
- 52 80. MacLeod MR, Michie S, Roberts I, Dirnagl U, Chalmers I, Ioannidis JPA, Salman RA-S, Chan A-W,  
53 Glasziou P. Biomedical research: increasing value, reducing waste. *The Lancet*.  
54 2014;383(9912):101–4. doi:10.1016/S0140-6736(13)62329-6  
55
- 56 81. Mellor D. Improving norms in research culture to incentivize transparency and rigor. *Educational*  
57 *Psychologist*. 2021;56(2):122–31. doi:10.1080/00461520.2021.1902329  
58  
59

- 1  
2  
3 82. Hirst A, Altman DG. Are peer reviewers encouraged to use reporting guidelines? A survey of 116  
4 health research journals. *PLoS ONE*. 2012;7(4):e35621. doi:10.1371/journal.pone.0035621 Cited  
5 in: PubMed; PMID 22558178.  
6  
7 83. Shamseer L, Hopewell S, Altman DG, Moher D, Schulz KF. Update on the endorsement of  
8 CONSORT by high impact factor journals: a survey of journal "Instructions to Authors" in 2014.  
9 *Trials*. 2016;17(1):301. doi:10.1186/s13063-016-1408-z Cited in: PubMed; PMID 27343072.  
10  
11 84. Moher D. Reporting guidelines: doing better for readers. *BMC Med*. 2018;16(1):233.  
12 doi:10.1186/s12916-018-1226-0 Cited in: PubMed; PMID 30545364.  
13  
14 85. Keehan KH, Gaffney MC, Zucker IH. CORP: Assessing author compliance with data presentation  
15 guidelines for manuscript figures. *Am J Physiol Heart Circ Physiol*. 2020;318(5):H1051-H1058.  
16 doi:10.1152/ajpheart.00071.2020 Cited in: PubMed; PMID 32196356.  
17  
18 86. Halffman W, Horbach SPJM. What are innovations in peer review and editorial assessment for?  
19 *Genome Biol*. 2020;21(1):87. doi:10.1186/s13059-020-02004-4 Cited in: PubMed; PMID 32362286.  
20  
21 87. Checco A, Bracciale L, Loreti P, Pinfield S, Bianchi G. AI-assisted peer review. *Humanit Soc Sci*  
22 *Commun*. 2021;8(1):1–11. En;en. doi:10.1057/s41599-020-00703-8  
23  
24 88. BMC. Advancing peer review at BMC [Internet]. 2021 [updated 2021 Apr 8; cited 2021 Apr 8].  
25 Available from: <https://www.biomedcentral.com/about/advancing-peer-review>  
26  
27 89. Soboczenski F, Trikalinos TA, Kuiper J, Bias RG, Wallace BC, Marshall IJ. Machine learning to help  
28 researchers evaluate biases in clinical trials: a prospective, randomized user study. *BMC Med*  
29 *Inform Decis Mak*. 2019;19(1):96. doi:10.1186/s12911-019-0814-z Cited in: PubMed; PMID  
30 31068178.  
31  
32 90. Kilicoglu H, Rosemblat G, Hoang L, Wadhwa S, Peng Z, Malički M, Schneider J, Ter Riet G. Toward  
33 assessing clinical trial publications for reporting transparency. *J Biomed Inform*. 2021;116:103717.  
34 doi:10.1016/j.jbi.2021.103717 Cited in: PubMed; PMID 33647518.  
35  
36 91. Weissgerber T, Riedel N, Kilicoglu H, Labbé C, Eckmann P, Ter Riet G, Byrne J, Cabanac G, Capes-  
37 Davis A, Favier B, Saladi S, Grabitz P, Bannach-Brown A, Schulz R, McCann S, Bernard R,  
38 Bandrowski A. Automated screening of COVID-19 preprints: can we help authors to improve  
39 transparency and reproducibility? *Nat Med*. 2021;27(1):6–7. doi:10.1038/s41591-020-01203-7  
40 Cited in: PubMed; PMID 33432174.  
41  
42 92. European Commission. Open science monitor [Internet]. 2018 [updated 2018 Nov 7; cited  
43 2021 Apr 10]. Available from: [https://ec.europa.eu/info/research-and-innovation/strategy/goals-](https://ec.europa.eu/info/research-and-innovation/strategy/goals-research-and-innovation-policy/open-science/open-science-monitor_en)  
44 [research-and-innovation-policy/open-science/open-science-monitor\\_en](https://ec.europa.eu/info/research-and-innovation-policy/open-science/open-science-monitor_en)  
45  
46 93. EU Trials Tracker. EU Trials Tracker — Who's not sharing clinical trial results? [Internet]: Evidence-  
47 Based Medicine Data Lab; University of Oxford. 2021 [updated 2021 Apr 12; cited 2021 Apr 12].  
48 Available from: <https://eu.trialstracker.net/>  
49  
50 94. Altman DG. WEBINAR: Doug Altman – CONSORT Statement guidance for reporting randomised  
51 trials | The EQUATOR Network [Internet]: EQUATOR. 2013 [updated 2021 Apr 8; cited 2021 Apr 8].  
52 Available from: [https://www.equator-network.org/2013/06/24/webinar-doug-altman-consort-](https://www.equator-network.org/2013/06/24/webinar-doug-altman-consort-statement-guidance-for-reporting-randomised-trials/)  
53 [statement-guidance-for-reporting-randomised-trials/](https://www.equator-network.org/2013/06/24/webinar-doug-altman-consort-statement-guidance-for-reporting-randomised-trials/)  
54  
55 95. Society for Transparency, Openness, and Replication in Kinesiology. Stork - Resources [Internet].  
56 2021 [updated 2021 Apr 8; cited 2021 Apr 8]. Available from:  
57 <https://storkinesiology.org/resources/>  
58  
59  
60

- 1  
2  
3 96. Hoffmann TC, Erueti C, Glasziou PP. Poor description of non-pharmacological interventions:  
4 analysis of consecutive sample of randomised trials. BMJ. 2013;347f3755. doi:10.1136/bmj.f3755  
5 Cited in: PubMed; PMID 24021722.  
6  
7  
8  
9  
10  
11  
12  
13  
14  
15  
16  
17  
18  
19  
20  
21  
22  
23  
24  
25  
26  
27  
28  
29  
30  
31  
32  
33  
34  
35  
36  
37  
38  
39  
40  
41  
42  
43  
44  
45  
46  
47  
48  
49  
50  
51  
52  
53  
54  
55  
56  
57  
58  
59  
60

For peer review only

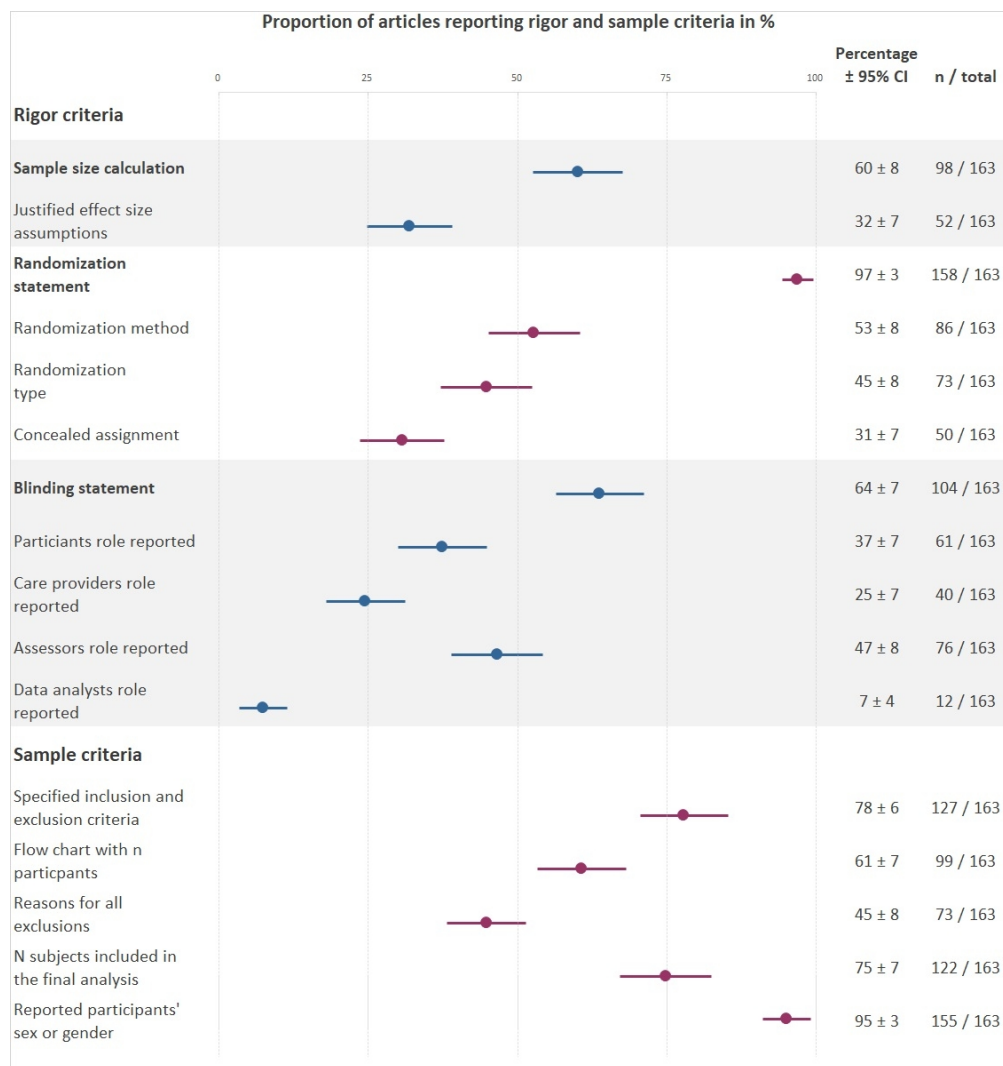

Figure 1 Reporting prevalence for rigor and sample criteria. This plot displays the percentage of trials that addressed each criteria. For information on the actual randomization or blinding status, please refer to the text. The different colored data points are for better visual differentiation of each subcategory. Created by the authors.

298x315mm (96 x 96 DPI)



Figure 2 The blinding status across the main different stakeholder groups across all clinical trials (n=163).  
Created by the authors.

110x108mm (144 x 144 DPI)

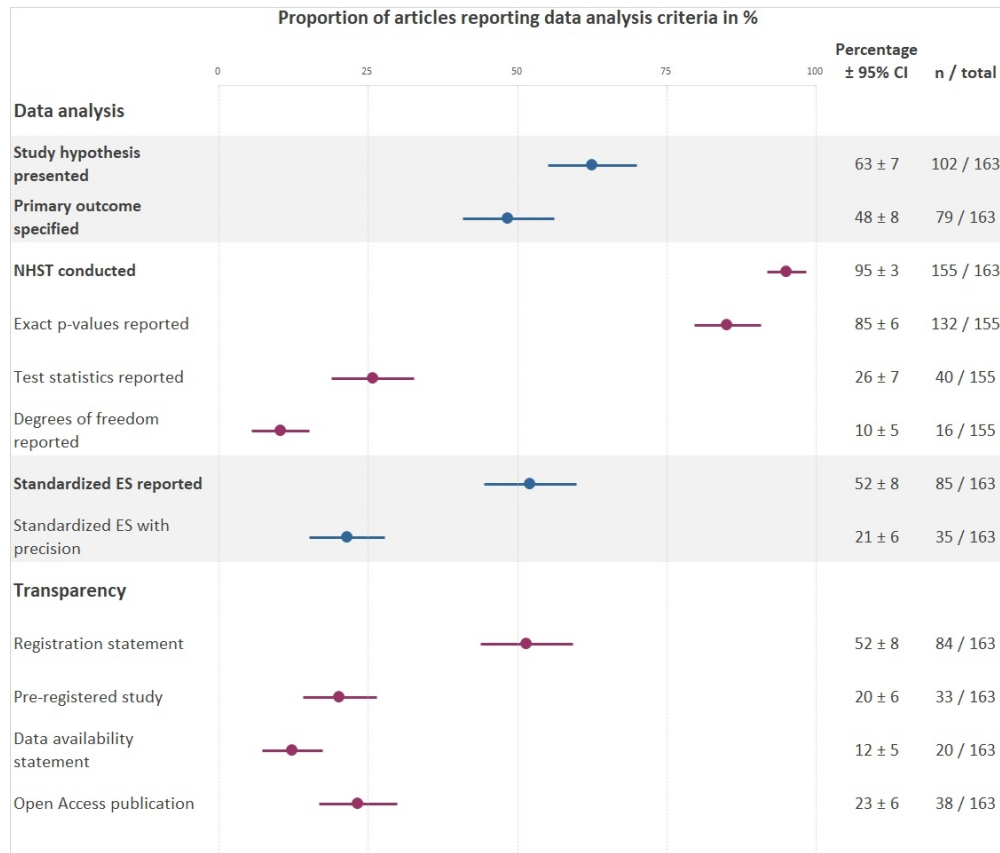

Figure 3 Reporting prevalence for data analysis and transparency criteria. This plot displays the percentage of trials that addressed each criteria. Abbreviations: NHST, null hypothesis statistical testing; ES, effect size. Created by the authors.

298x252mm (96 x 96 DPI)





Figure 4 A priori sample size calculations are essential for generating meaningful results with clinical trials. Created by the authors. This infographic focusses on key elements a priori sample size calculations that should be reported in clinical trial publication. However, it is important to note that each element should be justified individually including the thresholds for type 1 and type 2 errors, and the expected effect size. Daniel Lakens free article on sample size justification provides an excellent overview of aspects to consider when planning empirical research studies (62).

770x1332mm (96 x 96 DPI)

# The devil is in the details: Reporting and transparent research practices in orthopedic and sports medicine clinical trials

## Supplemental material

### Methods

#### Sample Size Calculation

This exploratory study does not require formal sample size calculations. However, conventionally, sample sizes between 30 and 150 subjects or items are recommended for exploratory study designs with non-probability sampling (1).

For information purposes only, a precision-based sample size estimation was performed to obtain rough estimates of relevant sample sizes. We assumed that three-quarters of articles would report the criteria (0.75), the margin of error would be 0.05, and a level of confidence of 0.8. These assumptions result in a calculated sample size of 124 articles. The estimated proportion was based on previous investigations in general medical journals (2–5). While the reporting prevalence varied substantially depending on the criterion, we chose an estimated reporting proportion of 75%, as the proportion of trials reporting information for risk of bias assessment was between 60 and 80% for most rigor criteria, and the latest large analysis of reporting in RCTs suggested that reporting was improving over time (5).

As the values chosen were estimates, additional sample size calculations were performed by varying the basic assumptions. The first alternative was to reduce the expected proportion from 75% to 66% (resulting in  $n=148$ ) or 50% (resulting in  $n=165$ ). Increasing the level of confidence from 0.8 to 0.9, with an expected proportion of 75%, would require an  $n$  of 203. After reviewing these estimates, the target sample size was set at

approximately n=175 clinical trials. Sample size calculations were performed with the web-based application Statulator (RRID:SCR\_021003; 6).

We searched for clinical trials published in August 2020; then went backward in time adding additional months until the target sample size was reached. The final search dates included clinical trials published between January and August 2020.

## Sample selection and screening process

Journals were selected on basis of the Scimago journal ranking list from 2019 in the subject category orthopedics and sports medicine as determined by 2019 by Scimago Journal Rank indicator (7). The Scimago journal-ranking list was sorted by the Scientific Journal Ranking. The top 25% of journals (n=65) were then entered into the PubMed search with filters for article type (clinical trial) and publication date (2019/12:2020/08). The search was run on September 16, 2020.

The search string was:

(((((("British journal of sports medicine"[Journal]) OR ("Sports Med"[jour]) OR ("The American journal of sports medicine"[Journal]) OR ("The bone & joint journal"[Journal]) OR ("The Journal of arthroplasty"[Journal]) OR ("The Journal of bone and joint surgery. American volume"[Journal]) OR ("Arthroscopy : the journal of arthroscopic & related surgery : official publication of the Arthroscopy Association of North America and the International Arthroscopy Association"[Journal]) OR ("Journal of bone and mineral research : the official journal of the American Society for Bone and Mineral Research"[Journal]) OR ("J Cachexia Sarcopenia Muscle"[jour]) OR ("Journal of shoulder and elbow surgery"[Journal]) OR ("Medicine and science in sports and exercise"[Journal]) OR ("Osteoarthritis and cartilage"[Journal]) OR ("International journal of sports physiology and

1  
2  
3 performance"[Journal])) OR ("Knee surgery, sports traumatology, arthroscopy : official journal  
4 of the ESSKA"[Journal])) OR ("Skeletal muscle"[Journal])) OR ("Exercise and sport sciences  
5 reviews"[Journal])) OR ("Acta orthopaedica"[Journal])) OR ("Spine"[Journal])) OR  
6 ("International orthopaedics"[Journal])) OR ("Clinical orthopaedics and related  
7 research"[Journal])) OR ("Foot & ankle international"[Journal])) OR ("Therapeutic advances in  
8 musculoskeletal disease"[Journal])) OR ("Journal of science and medicine in sport"[Journal]))  
9 OR ("Orthopaedic journal of sports medicine"[Journal])) OR ("European spine journal : official  
10 publication of the European Spine Society, the European Spinal Deformity Society, and the  
11 European Section of the Cervical Spine Research Society"[Journal])) OR ("Scandinavian  
12 journal of medicine & science in sports"[Journal])) OR ("Bone & joint research"[Journal])) OR  
13 ("Current reviews in musculoskeletal medicine"[Journal])) OR ("Global spine journal"[Journal]))  
14 OR ("The Journal of the American Academy of Orthopaedic Surgeons"[Journal])) OR ("The  
15 Journal of hand surgery"[Journal])) OR ("Journal of teaching in physical education :  
16 JTPE"[Journal])) OR ("International journal of sport nutrition and exercise  
17 metabolism"[Journal])) OR ("Journal of strength and conditioning research"[Journal])) OR  
18 ("Journal of sports sciences"[Journal])) OR ("Journal of pediatric orthopedics"[Journal])) OR  
19 ("Annals of physical and rehabilitation medicine"[Journal])) OR ("Sports health"[Journal])) OR  
20 ("Archives of orthopaedic and trauma surgery"[Journal])) OR ("Journal of sport and health  
21 science"[Journal]) ) OR ("European journal of applied physiology"[Journal])) OR ("European  
22 journal of sport science"[Journal])) OR ("The spine journal : official journal of the North American  
23 Spine Society"[Journal])) OR ("International journal of sports medicine"[Journal])) OR ("The  
24 Knee"[Journal])) OR ("The Orthopedic clinics of North America"[Journal])) OR ("Physical  
25 education and sport pedagogy"[Journal])) OR ("Journal of athletic training"[Journal])) OR  
26 ("Calcified tissue international"[Journal]) ) OR ("Sport, education and society"[Journal])) OR  
27 ("Journal of orthopaedics and traumatology : official journal of the Italian Society of  
28 Orthopaedics and Traumatology"[Journal])) OR ("Journal of orthopaedic trauma"[Journal])) OR  
29  
30  
31  
32  
33  
34  
35  
36  
37  
38  
39  
40  
41  
42  
43  
44  
45  
46  
47  
48  
49  
50  
51  
52  
53  
54  
55  
56  
57  
58  
59  
60

1  
2  
3 ("Journal of orthopaedic research : official publication of the Orthopaedic Research  
4 Society"[Journal])) OR ("Journal of biomechanics"[Journal])) OR ("Clinical journal of sport  
5 medicine : official journal of the Canadian Academy of Sport Medicine"[Journal])) OR ("EFORT  
6 open reviews"[Journal]) ) OR ("Orthopaedics & traumatology, surgery & research :  
7 OTSR"[Journal])) OR ("Sports medicine - open"[Journal])) OR ("Clinics in sports  
8 medicine"[Journal])) OR ("European physical education review"[Journal])) OR ("The journal of  
9 knee surgery"[Journal])) OR ("Injury"[Journal])) OR ("Gait & posture"[Journal])) OR ("Research  
10 in sports medicine (Print)"[Journal])) AND ((clinicaltrial[Filter]) AND (2019/12:2020/08[pdat]))  
11  
12  
13  
14  
15  
16  
17  
18  
19  
20  
21

## 22 Data Abstraction

23  
24 All reviewers completed training on a minimum of 10 articles to ensure that responses  
25 were consistent before starting data abstraction. Data from all included studies were  
26 extracted using preformatted Excel spreadsheets.  
27  
28  
29  
30  
31

## 32 Results

33  
34 The search retrieved 175 articles from 27 journals Table S1. All articles were then  
35 uploaded into Rayyan (RRID:SCR\_017584; 8) for title and abstract screening. Two  
36 reviewers (RS, GL) performed title and abstract screening to exclude articles that were  
37 obviously not clinical trials, as defined by the ICMJE. The ICMJE defines a clinical trial as  
38 any research project that prospectively assigns people or a group of people to an  
39 intervention, with or without concurrent comparison or control groups, to study the  
40 relationship between a health-related intervention and a health outcome (9). After the title  
41 and abstract screening, two independent abstractors (RS, GL, RP) reviewed each full-  
42 length, original research article and any available supplemental files. All papers meeting  
43  
44  
45  
46  
47  
48  
49  
50  
51  
52  
53  
54  
55  
56  
57  
58  
59  
60

the ICMJE definition of a clinical trial were included. Disagreements were resolved by consensus.

Table S1 Identified top 25% journals that published clinical trials in the time period of interest, the number of identified published articles, and the number of included articles

| <b>Title</b>                                               | <b>Number of articles identified in search</b> | <b>Number of included articles</b> |
|------------------------------------------------------------|------------------------------------------------|------------------------------------|
| Medicine and Science in Sports and Exercise                | 22                                             | 21                                 |
| Journal of Strength and Conditioning Research              | 22                                             | 21                                 |
| Bone and Joint Journal                                     | 21                                             | 18                                 |
| Journal of Sports Sciences                                 | 13                                             | 12                                 |
| British Journal of Sports Medicine                         | 12                                             | 12                                 |
| Knee Surgery, Sports Traumatology, Arthroscopy             | 9                                              | 6                                  |
| Journal of Bone and Joint Surgery - Series A               | 8                                              | 5                                  |
| Acta Orthopaedica                                          | 8                                              | 8                                  |
| Scandinavian Journal of Medicine and Science in Sports     | 8                                              | 8                                  |
| American Journal of Sports Medicine                        | 7                                              | 7                                  |
| Journal of Shoulder and Elbow Surgery                      | 7                                              | 7                                  |
| Spine                                                      | 6                                              | 6                                  |
| Journal of Science and Medicine in Sport                   | 6                                              | 6                                  |
| International Journal of Sports Medicine                   | 6                                              | 6                                  |
| Sports Health                                              | 5                                              | 5                                  |
| International Journal of Sports Physiology and Performance | 4                                              | 4                                  |
| European Journal of Sport Science                          | 3                                              | 3                                  |
| Journal of Sport and Health Science                        | 2                                              | 2                                  |
| Clinical Orthopaedics and Related Research                 | 1                                              | 1                                  |
| Foot and Ankle International                               | 1                                              | 1                                  |
| Archives of Orthopaedic and Trauma Surgery                 | 1                                              | 1                                  |
| Spine Journal                                              | 1                                              | 1                                  |
| Knee                                                       | 1                                              | 1                                  |
| Journal of Athletic Training                               | 1                                              | 1                                  |
|                                                            | <b>175</b>                                     | <b>163</b>                         |

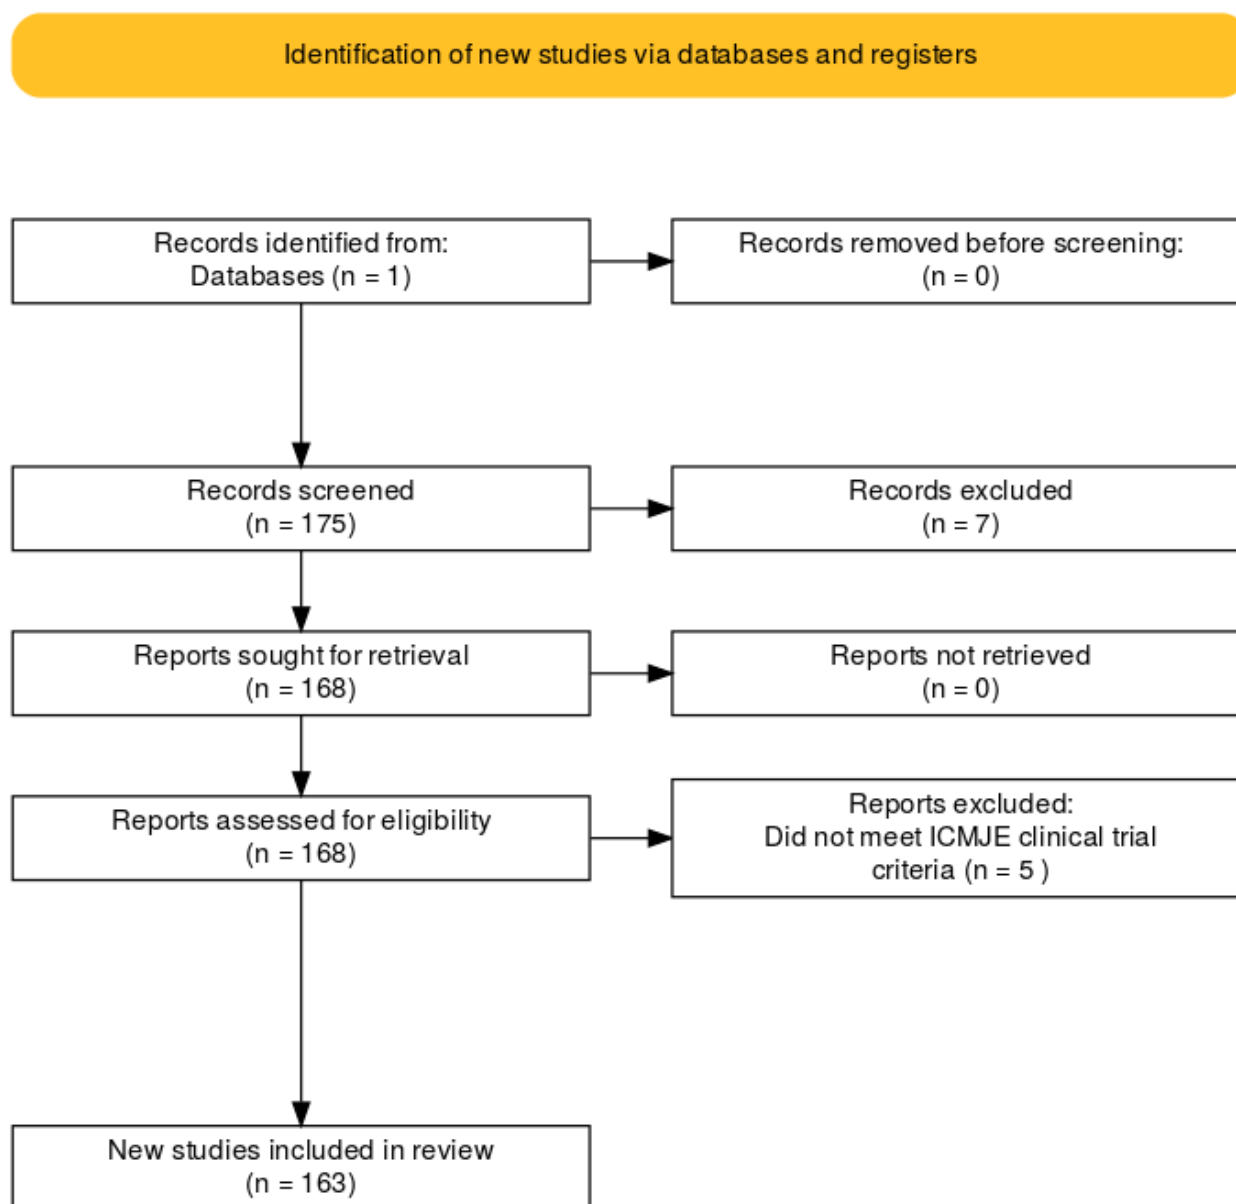

41 **Figure S1** Flow chart of the study selection process. Seven studies were excluded during the  
42 abstract screening because they did not meet the ICMJE clinical trial criteria (n=6) or were the  
43 wrong publication type (extended conference abstract; n=1). The flow diagram was created with  
44 the ShinyApp for PRISMA 2020 (RRID: 10,11).  
45  
46  
47  
48  
49  
50  
51  
52  
53  
54  
55  
56  
57  
58  
59  
60

## References

1. Daniel J, editor. *Sampling essentials: Practical guidelines for making sampling choices*. Los Angeles, Calif.: SAGE Publ; 2012. 291 p. eng.
2. Ghimire S, Kyung E, Kang W, Kim E. Assessment of adherence to the CONSORT statement for quality of reports on randomized controlled trial abstracts from four high-impact general medical journals. *Trials*. 2012;1377. doi:10.1186/1745-6215-13-77 Cited in: PubMed; PMID 22676267.
3. Turner L, Shamseer L, Altman DG, Schulz KF, Moher D. Does use of the CONSORT Statement impact the completeness of reporting of randomised controlled trials published in medical journals? A Cochrane review. *Syst Rev*. 2012;160. doi:10.1186/2046-4053-1-60 Cited in: PubMed; PMID 23194585.
4. Chess LE, Gagnier J. Risk of bias of randomized controlled trials published in orthopaedic journals. *BMC Med Res Methodol*. 2013;1376. doi:10.1186/1471-2288-13-76 Cited in: PubMed; PMID 23758875.
5. Dechartres A, Trinquart L, Atal I, Moher D, Dickersin K, Boutron I, Perrodeau E, Altman DG, Ravaut P. Evolution of poor reporting and inadequate methods over time in 20 920 randomised controlled trials included in Cochrane reviews: research on research study. *BMJ*. 2017;357j2490. doi:10.1136/bmj.j2490 Cited in: PubMed; PMID 28596181.
6. Khatkar M, Dhand N. *Statulator*; 2014.
7. SCImago (nd). SJR — SCImago Journal & Country Rank [Portal] [Internet]. 2020 [cited 2021 Feb 22]. Available from: <https://www.scimagojr.com/journalrank.php?category=2732>
8. Ouzzani M, Hammady H, Fedorowicz Z, Elmagarmid A. Rayyan-a web and mobile app for systematic reviews. *Syst Rev*. 2016;5(1):210. doi:10.1186/s13643-016-0384-4 Cited in: PubMed; PMID 27919275.
9. ICMJE. Recommendations for the Conduct, Reporting, Editing and Publication of Scholarly Work in Medical Journals [Internet]. 2020 [cited 2020 Aug 4]. Available from: <http://www.ICMJE.org>.
10. Haddaway NR, McGuinness L. PRISMA2020: R package and ShinyApp for producing PRISMA 2020 compliant flow diagrams: Zenodo; 2020.
11. Page MJ, McKenzie JE, Bossuyt PM, Boutron I, Hoffmann TC, Mulrow CD, Shamseer L, Tetzlaff JM, Akl EA, Brennan SE, Chou R, Glanville J, Grimshaw JM, Hróbjartsson A, Lalu MM, Li T, Loder EW, Mayo-Wilson E, McDonald S, McGuinness LA, Stewart LA, Thomas J, Tricco AC, Welch VA, Whiting P, Moher D. The PRISMA 2020 statement: an updated guideline for reporting systematic reviews. *BMJ*. 2021;372n71. doi:10.1136/bmj.n71 Cited in: PubMed; PMID 33782057.



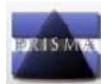

## PRISMA 2020 Checklist

*NOTE: This is a meta-research study. Despite some methodological similarities between Systematic Reviews and our meta-research study, some elements of PRISMA 2020 do not apply.*

| Section and Topic             | Item # | Checklist item                                                                                                                                                                                                                                                                                       | Location where item is reported                                                                        |
|-------------------------------|--------|------------------------------------------------------------------------------------------------------------------------------------------------------------------------------------------------------------------------------------------------------------------------------------------------------|--------------------------------------------------------------------------------------------------------|
| <b>TITLE</b>                  |        |                                                                                                                                                                                                                                                                                                      |                                                                                                        |
| Title                         | 1      | Identify the report as a systematic review.                                                                                                                                                                                                                                                          | NA, meta-research study, not systematic review, study type is given in the title (meta-research study) |
| <b>ABSTRACT</b>               |        |                                                                                                                                                                                                                                                                                                      |                                                                                                        |
| Abstract                      | 2      | See the PRISMA 2020 for Abstracts checklist.                                                                                                                                                                                                                                                         |                                                                                                        |
| <b>INTRODUCTION</b>           |        |                                                                                                                                                                                                                                                                                                      |                                                                                                        |
| Rationale                     | 3      | Describe the rationale for the review in the context of existing knowledge.                                                                                                                                                                                                                          | p. 2-3                                                                                                 |
| Objectives                    | 4      | Provide an explicit statement of the objective(s) or question(s) the review addresses.                                                                                                                                                                                                               | p. 3                                                                                                   |
| <b>METHODS</b>                |        |                                                                                                                                                                                                                                                                                                      |                                                                                                        |
| Eligibility criteria          | 5      | Specify the inclusion and exclusion criteria for the review and how studies were grouped for the syntheses.                                                                                                                                                                                          | p. 5-6                                                                                                 |
| Information sources           | 6      | Specify all databases, registers, websites, organisations, reference lists and other sources searched or consulted to identify studies. Specify the date when each source was last searched or consulted.                                                                                            | p. 5                                                                                                   |
| Search strategy               | 7      | Present the full search strategies for all databases, registers and websites, including any filters and limits used.                                                                                                                                                                                 | p. 5 + supplements                                                                                     |
| Selection process             | 8      | Specify the methods used to decide whether a study met the inclusion criteria of the review, including how many reviewers screened each record and each report retrieved, whether they worked independently, and if applicable, details of automation tools used in the process.                     | p. 5-6                                                                                                 |
| Data collection process       | 9      | Specify the methods used to collect data from reports, including how many reviewers collected data from each report, whether they worked independently, any processes for obtaining or confirming data from study investigators, and if applicable, details of automation tools used in the process. | p. 6                                                                                                   |
| Data items                    | 10a    | List and define all outcomes for which data were sought. Specify whether all results that were compatible with each outcome domain in each study were sought (e.g. for all measures, time points, analyses), and if not, the methods used to decide which results to collect.                        | p. 8-9                                                                                                 |
|                               | 10b    | List and define all other variables for which data were sought (e.g. participant and intervention characteristics, funding sources). Describe any assumptions made about any missing or unclear information.                                                                                         | NA                                                                                                     |
| Study risk of bias assessment | 11     | Specify the methods used to assess risk of bias in the included studies, including details of the tool(s) used, how many reviewers assessed each study and whether they worked independently, and if applicable, details of automation tools used in the process.                                    | NA, meta-research study                                                                                |
| Effect measures               | 12     | Specify for each outcome the effect measure(s) (e.g. risk ratio, mean difference) used in the synthesis or presentation of results.                                                                                                                                                                  | p. 7                                                                                                   |
| Synthesis methods             | 13a    | Describe the processes used to decide which studies were eligible for each synthesis (e.g. tabulating the study intervention characteristics and comparing against the planned groups for each synthesis (item #5)).                                                                                 | NA, not a systematic review                                                                            |
|                               | 13b    | Describe any methods required to prepare the data for presentation or synthesis, such as handling of missing summary statistics, or data conversions.                                                                                                                                                |                                                                                                        |



## PRISMA 2020 Checklist

*NOTE: This is a meta-research study. Despite some methodological similarities between Systematic Reviews and our meta-research study, some elements of PRISMA 2020 do not apply.*

| Section and Topic             | Item # | Checklist item                                                                                                                                                                                                                                                                       | Location where item is reported |
|-------------------------------|--------|--------------------------------------------------------------------------------------------------------------------------------------------------------------------------------------------------------------------------------------------------------------------------------------|---------------------------------|
|                               | 13c    | Describe any methods used to tabulate or visually display results of individual studies and syntheses.                                                                                                                                                                               |                                 |
|                               | 13d    | Describe any methods used to synthesize results and provide a rationale for the choice(s). If meta-analysis was performed, describe the model(s), method(s) to identify the presence and extent of statistical heterogeneity, and software package(s) used.                          |                                 |
|                               | 13e    | Describe any methods used to explore possible causes of heterogeneity among study results (e.g. subgroup analysis, meta-regression).                                                                                                                                                 |                                 |
|                               | 13f    | Describe any sensitivity analyses conducted to assess robustness of the synthesized results.                                                                                                                                                                                         |                                 |
| Reporting bias assessment     | 14     | Describe any methods used to assess risk of bias due to missing results in a synthesis (arising from reporting biases).                                                                                                                                                              |                                 |
| Certainty assessment          | 15     | Describe any methods used to assess certainty (or confidence) in the body of evidence for an outcome.                                                                                                                                                                                |                                 |
| <b>RESULTS</b>                |        |                                                                                                                                                                                                                                                                                      |                                 |
| Study selection               | 16a    | Describe the results of the search and selection process, from the number of records identified in the search to the number of studies included in the review, ideally using a flow diagram.                                                                                         | p. 10, Figure S1, Table S1      |
|                               | 16b    | Cite studies that might appear to meet the inclusion criteria, but which were excluded, and explain why they were excluded.                                                                                                                                                          | NA                              |
| Study characteristics         | 17     | Cite each included study and present its characteristics.                                                                                                                                                                                                                            | NA, not a systematic review     |
| Risk of bias in studies       | 18     | Present assessments of risk of bias for each included study.                                                                                                                                                                                                                         |                                 |
| Results of individual studies | 19     | For all outcomes, present, for each study: (a) summary statistics for each group (where appropriate) and (b) an effect estimate and its precision (e.g. confidence/credible interval), ideally using structured tables or plots.                                                     |                                 |
| Results of syntheses          | 20a    | For each synthesis, briefly summarise the characteristics and risk of bias among contributing studies.                                                                                                                                                                               |                                 |
|                               | 20b    | Present results of all statistical syntheses conducted. If meta-analysis was done, present for each the summary estimate and its precision (e.g. confidence/credible interval) and measures of statistical heterogeneity. If comparing groups, describe the direction of the effect. | p. 11-15, p. 16                 |
|                               | 20c    | Present results of all investigations of possible causes of heterogeneity among study results.                                                                                                                                                                                       |                                 |
|                               | 20d    | Present results of all sensitivity analyses conducted to assess the robustness of the synthesized results.                                                                                                                                                                           | NA, not a systematic review     |
| Reporting biases              | 21     | Present assessments of risk of bias due to missing results (arising from reporting biases) for each synthesis assessed.                                                                                                                                                              |                                 |
| Certainty of evidence         | 22     | Present assessments of certainty (or confidence) in the body of evidence for each outcome assessed.                                                                                                                                                                                  |                                 |
| <b>DISCUSSION</b>             |        |                                                                                                                                                                                                                                                                                      |                                 |
| Discussion                    | 23a    | Provide a general interpretation of the results in the context of other evidence.                                                                                                                                                                                                    | p. 17-20                        |
|                               | 23b    | Discuss any limitations of the evidence included in the review.                                                                                                                                                                                                                      | p. 22-23                        |
|                               | 23c    | Discuss any limitations of the review processes used.                                                                                                                                                                                                                                |                                 |



## PRISMA 2020 Checklist

*NOTE: This is a meta-research study. Despite some methodological similarities between Systematic Reviews and our meta-research study, some elements of PRISMA 2020 do not apply.*

| Section and Topic                              | Item # | Checklist item                                                                                                                                                                                                                             | Location where item is reported |
|------------------------------------------------|--------|--------------------------------------------------------------------------------------------------------------------------------------------------------------------------------------------------------------------------------------------|---------------------------------|
|                                                | 23d    | Discuss implications of the results for practice, policy, and future research.                                                                                                                                                             | p. 21-22                        |
| <b>OTHER INFORMATION</b>                       |        |                                                                                                                                                                                                                                            |                                 |
| Registration and protocol                      | 24a    | Provide registration information for the review, including register name and registration number, or state that the review was not registered.                                                                                             | p. 5                            |
|                                                | 24b    | Indicate where the review protocol can be accessed, or state that a protocol was not prepared.                                                                                                                                             | p. 5                            |
|                                                | 24c    | Describe and explain any amendments to information provided at registration or in the protocol.                                                                                                                                            | p. 6                            |
| Support                                        | 25     | Describe sources of financial or non-financial support for the review, and the role of the funders or sponsors in the review.                                                                                                              | p. 25                           |
| Competing interests                            | 26     | Declare any competing interests of review authors.                                                                                                                                                                                         | p. 25                           |
| Availability of data, code and other materials | 27     | Report which of the following are publicly available and where they can be found: template data collection forms; data extracted from included studies; data used for all analyses; analytic code; any other materials used in the review. | p. 24                           |

From: Page MJ, McKenzie JE, Bossuyt PM, Boutron I, Hoffmann TC, Mulrow CD, et al. The PRISMA 2020 statement: an updated guideline for reporting systematic reviews. *BMJ* 2021;372:n71. doi: 10.1136/bmj.n71  
 For more information, visit: <http://www.prisma-statement.org/>
